# Supplementary material for: Weak intramolecular and intermolecular hydrogen bonding of benzyl alcohol, 2-phenylethanol and 2-phenylethylamine in the adsorption on graphitized thermal carbon black
Source: Royal Society of Chemistry journal article supplement (doi:10.1039/c5cp04295j), 2015-01-01
Supplement: c5cp04295j6.pdf [file c5cp04295j6.pdf]

This journal is © the Owner Societies 2015

| $\tau_2 \backslash \tau_1$ | $\tau_1 = 0$ | $\tau_1 = 10$ | $\tau_1 = 20$ | $\tau_1 = 30$ | $\tau_1 = 40$ | $\tau_1 = 50$ | $\tau_1 = 60$ | $\tau_1 = 70$ | $\tau_1 = 80$ | $\tau_1 = 90$ | $\Delta E$ , kJ/mol | $\tau_2$ | $\tau_3$ | $\tau_1 = 0$ | $\tau_1 = 10$ | $\tau_1 = 20$ | $\tau_1 = 30$ | $\tau_1 = 40$ | $\tau_1 = 50$ | $\tau_1 = 60$ | $\tau_1 = 70$ | $\tau_1 = 80$ | $\tau_1 = 90$ |
|----------------------------|--------------|---------------|---------------|---------------|---------------|---------------|---------------|---------------|---------------|---------------|---------------------|----------|----------|--------------|---------------|---------------|---------------|---------------|---------------|---------------|---------------|---------------|---------------|
| 0 0                        | 67,8         | 65,3          | 58,0          | 48,5          | 39,5          | 32,5          | 28,2          | 26,3          | 25,7          | 25,5          | 180                 | 0        | 0        | 14,9         | 14,9          | 15,0          | 14,7          | 13,9          | 12,6          | 11,0          | 9,7           | 9,0           | 8,8           |
| 0 10                       | 66,9         | 62,6          | 54,7          | 45,7          | 37,4          | 31,2          | 27,6          | 26,0          | 25,5          | 25,3          |                     | 10       | 10       | 14,6         | 14,7          | 14,8          | 14,5          | 13,6          | 12,2          | 10,6          | 9,3           | 8,7           | 8,4           |
| 0 20                       | 64,1         | 58,7          | 51,0          | 42,6          | 35,2          | 29,7          | 26,7          | 25,4          | 25,0          | 24,8          |                     | 20       | 20       | 13,7         | 13,8          | 13,9          | 13,6          | 12,7          | 11,3          | 9,6           | 8,3           | 7,7           | 7,4           |
| 0 30                       | 60,1         | 54,5          | 47,3          | 39,8          | 33,2          | 28,4          | 25,9          | 24,8          | 24,3          | 24,2          |                     | 30       | 30       | 12,4         | 12,6          | 12,8          | 12,4          | 11,5          | 10,0          | 8,3           | 7,0           | 6,3           | 6,1           |
| 0 40                       | 55,9         | 50,6          | 44,1          | 37,4          | 31,6          | 27,4          | 25,2          | 24,2          | 23,8          | 23,7          |                     | 40       | 40       | 11,2         | 11,4          | 11,5          | 11,2          | 10,2          | 8,7           | 7,0           | 5,6           | 4,9           | 4,7           |
| 0 50                       | 52,2         | 47,4          | 41,7          | 35,9          | 30,8          | 27,0          | 24,9          | 24,0          | 23,6          | 23,6          |                     | 50       | 50       | 10,2         | 10,5          | 10,6          | 10,3          | 9,2           | 7,7           | 6,0           | 4,6           | 3,9           | 3,6           |
| 0 60                       | 49,5         | 45,3          | 40,4          | 35,3          | 30,6          | 27,1          | 25,1          | 24,2          | 24,0          | 24,1          |                     | 60       | 60       | 9,8          | 10,0          | 10,2          | 9,8           | 8,8           | 7,2           | 5,5           | 4,1           | 3,3           | 3,1           |
| 0 70                       | 47,9         | 44,4          | 40,2          | 35,6          | 31,3          | 27,9          | 25,9          | 25,1          | 24,9          | 25,0          |                     | 70       | 70       | 9,9          | 10,1          | 10,3          | 9,9           | 8,9           | 7,3           | 5,5           | 4,1           | 3,4           | 3,1           |
| 0 80                       | 47,5         | 44,6          | 40,9          | 36,7          | 32,6          | 29,3          | 27,4          | 26,6          | 26,4          | 26,5          |                     | 80       | 80       | 10,5         | 10,8          | 10,9          | 10,5          | 9,5           | 7,9           | 6,2           | 4,8           | 4,0           | 3,7           |
| 0 90                       | 47,9         | 45,5          | 42,2          | 38,3          | 34,2          | 31,0          | 29,1          | 28,4          | 28,2          | 28,3          |                     | 90       | 90       | 11,4         | 11,6          | 11,7          | 11,4          | 10,4          | 8,9           | 7,2           | 5,8           | 5,0           | 4,6           |
| 0 100                      | 48,8         | 46,7          | 43,7          | 40,0          | 36,0          | 32,9          | 31,0          | 30,2          | 30,0          | 30,1          |                     | 100      | 100      | 12,3         | 12,5          | 12,6          | 12,3          | 11,3          | 9,9           | 8,2           | 6,8           | 6,0           | 5,6           |
| 0 110                      | 49,7         | 48,0          | 45,2          | 41,6          | 37,6          | 34,5          | 32,6          | 31,8          | 31,5          | 31,6          |                     | 110      | 110      | 13,0         | 13,1          | 13,2          | 12,9          | 12,0          | 10,6          | 9,0           | 7,6           | 6,7           | 6,4           |
| 0 120                      | 50,4         | 49,0          | 46,3          | 42,6          | 38,7          | 35,5          | 33,6          | 32,8          | 32,5          | 32,6          |                     | 120      | 120      | 13,2         | 13,2          | 13,3          | 13,0          | 12,2          | 10,8          | 9,2           | 7,8           | 7,0           | 6,7           |
| 0 130                      | 50,7         | 49,4          | 46,7          | 43,1          | 39,2          | 36,0          | 34,0          | 33,2          | 32,8          | 32,9          |                     | 130      | 130      | 12,8         | 12,9          | 12,9          | 12,7          | 11,9          | 10,5          | 9,0           | 7,6           | 6,8           | 6,4           |
| 0 140                      | 50,4         | 49,2          | 46,6          | 43,0          | 39,0          | 35,8          | 33,8          | 32,9          | 32,5          | 32,5          |                     | 140      | 140      | 12,0         | 12,0          | 12,1          | 11,8          | 11,1          | 9,8           | 8,2           | 6,9           | 6,0           | 5,7           |
| 0 150                      | 49,6         | 48,5          | 46,0          | 42,4          | 38,4          | 35,2          | 33,1          | 32,1          | 31,7          | 31,7          |                     | 150      | 150      | 10,8         | 10,8          | 10,9          | 10,7          | 9,9           | 8,7           | 7,1           | 5,8           | 5,0           | 4,7           |
| 0 160                      | 48,6         | 47,6          | 45,2          | 41,7          | 37,8          | 34,5          | 32,3          | 31,2          | 30,8          | 30,8          |                     | 160      | 160      | 9,5          | 9,6           | 9,7           | 9,5           | 8,8           | 7,5           | 6,0           | 4,7           | 3,9           | 3,6           |
| 0 170                      | 47,8         | 47,0          | 44,7          | 41,3          | 37,4          | 34,0          | 31,7          | 30,5          | 30,1          | 30,0          |                     | 170      | 170      | 8,6          | 8,7           | 8,8           | 8,6           | 7,9           | 6,7           | 5,2           | 3,9           | 3,1           | 2,9           |
| 0 180                      | 47,5         | 46,8          | 44,7          | 41,4          | 37,5          | 34,0          | 31,6          | 30,3          | 29,8          | 29,7          |                     | 180      | 180      | 8,2          | 8,3           | 8,4           | 8,2           | 7,5           | 6,3           | 4,8           | 3,5           | 2,8           | 2,6           |
| 0 190                      | 47,8         | 47,3          | 45,3          | 42,0          | 38,1          | 34,5          | 32,0          | 30,8          | 30,2          | 30,0          |                     | 190      | 190      | 8,6          | 8,7           | 8,7           | 8,5           | 7,8           | 6,5           | 5,0           | 3,7           | 3,1           | 2,9           |
| 0 200                      | 48,6         | 48,2          | 46,3          | 43,1          | 39,2          | 35,6          | 33,0          | 31,6          | 31,0          | 30,8          |                     | 200      | 200      | 9,5          | 9,6           | 9,6           | 9,4           | 8,6           | 7,3           | 5,7           | 4,5           | 3,8           | 3,7           |
| 0 210                      | 49,6         | 49,3          | 47,5          | 44,4          | 40,5          | 36,8          | 34,2          | 32,8          | 32,0          | 31,7          |                     | 210      | 210      | 10,8         | 10,8          | 10,8          | 10,5          | 9,7           | 8,3           | 6,7           | 5,5           | 4,9           | 4,7           |
| 0 220                      | 50,4         | 50,2          | 48,5          | 45,6          | 41,7          | 38,0          | 35,2          | 33,7          | 32,9          | 32,5          |                     | 220      | 220      | 12,0         | 12,0          | 12,0          | 11,7          | 10,8          | 9,4           | 7,7           | 6,5           | 5,9           | 5,7           |
| 0 230                      | 50,7         | 50,7          | 49,2          | 46,4          | 42,6          | 38,7          | 35,9          | 34,2          | 33,3          | 32,8          |                     | 230      | 230      | 12,8         | 12,8          | 12,8          | 12,4          | 11,5          | 10,1          | 8,5           | 7,2           | 6,6           | 6,5           |
| 0 240                      | 50,4         | 50,6          | 49,4          | 46,7          | 42,9          | 39,0          | 35,9          | 34,1          | 33,1          | 32,6          |                     | 240      | 240      | 13,2         | 13,1          | 13,1          | 12,7          | 11,8          | 10,4          | 8,7           | 7,5           | 6,9           | 6,7           |
| 0 250                      | 49,7         | 50,2          | 49,2          | 46,7          | 42,9          | 38,7          | 35,3          | 33,3          | 32,1          | 31,6          |                     | 250      | 250      | 13,0         | 12,9          | 12,8          | 12,4          | 11,5          | 10,1          | 8,5           | 7,2           | 6,6           | 6,4           |
| 0 260                      | 48,8         | 49,6          | 48,9          | 46,5          | 42,5          | 38,0          | 34,3          | 32,0          | 30,7          | 30,1          |                     | 260      | 260      | 12,3         | 12,2          | 12,1          | 11,7          | 10,8          | 9,4           | 7,7           | 6,5           | 5,8           | 5,7           |
| 0 270                      | 47,9         | 49,1          | 48,7          | 46,4          | 42,2          | 37,2          | 33,0          | 30,4          | 29,0          | 28,3          |                     | 270      | 270      | 11,4         | 11,2          | 11,1          | 10,7          | 9,8           | 8,4           | 6,8           | 5,5           | 4,9           | 4,7           |
| 0 280                      | 47,5         | 49,2          | 49,0          | 46,7          | 42,1          | 36,5          | 31,8          | 28,8          | 27,2          | 26,5          |                     | 280      | 280      | 10,5         | 10,3          | 10,2          | 9,7           | 8,8           | 7,4           | 5,9           | 4,6           | 3,9           | 3,7           |
| 0 290                      | 47,9         | 50,1          | 50,2          | 47,7          | 42,3          | 36,0          | 30,8          | 27,5          | 25,7          | 25,0          |                     | 290      | 290      | 9,9          | 9,7           | 9,5           | 9,1           | 8,2           | 6,8           | 5,3           | 4,0           | 3,4           | 3,1           |
| 0 300                      | 49,5         | 52,1          | 52,2          | 49,2          | 42,8          | 35,6          | 30,0          | 26,5          | 24,7          | 24,0          |                     | 300      | 300      | 9,8          | 9,5           | 9,4           | 9,0           | 8,1           | 6,8           | 5,2           | 4,0           | 3,3           | 3,1           |
| 0 310                      | 52,2         | 55,1          | 55,0          | 50,9          | 43,3          | 35,5          | 29,5          | 26,0          | 24,2          | 23,6          |                     | 310      | 310      | 10,2         | 10,0          | 9,9           | 9,5           | 8,6           | 7,3           | 5,8           | 4,6           | 3,9           | 3,6           |
| 0 320                      | 55,9         | 58,8          | 57,9          | 52,3          | 43,6          | 35,3          | 29,3          | 25,8          | 24,2          | 23,7          |                     | 320      | 320      | 11,2         | 11,0          | 10,9          | 10,5          | 9,7           | 8,4           | 6,9           | 5,6           | 5,0           | 4,7           |
| 0 330                      | 60,1         | 62,4          | 60,2          | 52,9          | 43,4          | 35,0          | 29,2          | 25,9          | 24,5          | 24,2          |                     | 330      | 330      | 12,4         | 12,3          | 12,2          | 11,9          | 11,1          | 9,8           | 8,3           | 7,0           | 6,4           | 6,1           |
| 0 340                      | 64,1         | 65,1          | 61,1          | 52,4          | 42,6          | 34,5          | 29,0          | 26,2          | 25,0          | 24,8          |                     | 340      | 340      | 13,7         | 13,6          | 13,6          | 13,3          | 12,4          | 11,1          | 9,6           | 8,4           | 7,7           | 7,4           |
| 0 350                      | 66,9         | 66,2          | 60,3          | 50,9          | 41,3          | 33,7          | 28,7          | 26,3          | 25,5          | 25,3          |                     | 350      | 350      | 14,6         | 14,5          | 14,6          | 14,3          | 13,5          | 12,2          | 10,6          | 9,3           | 8,7           | 8,4           |
| 0 360                      | 67,8         | 65,3          | 58,0          | 48,5          | 39,5          | 32,5          | 28,2          | 26,3          | 25,7          | 25,5          |                     | 360      | 360      | 14,9         | 14,9          | 15,0          | 14,7          | 13,9          | 12,6          | 11,0          | 9,7           | 9,0           | 8,8           |
| 10 0                       | 64,2         | 58,0          | 49,5          | 40,8          | 33,5          | 28,5          | 26,0          | 25,0          | 24,4          | 24,3          | 190                 | 0        | 0        | 16,2         | 16,7          | 16,8          | 16,4          | 15,2          | 13,6          | 11,8          | 10,5          | 9,9           | 9,8           |
| 10 10                      | 61,3         | 54,6          | 46,6          | 38,7          | 32,2          | 28,0          | 25,8          | 25,0          | 24,5          | 24,3          |                     | 10       | 10       | 16,0         | 16,5          | 16,7          | 16,2          | 15,0          | 13,3          | 11,5          | 10,2          | 9,6           | 9,5           |
| 10 20                      | 57,4         | 50,8          | 43,5          | 36,5          | 30,8          | 27,2          | 25,4          | 24,7          | 24,2          | 24,1          |                     | 20       | 20       | 15,2         | 15,8          | 15,9          | 15,4          | 14,2          | 12,4          | 10,6          | 9,3           | 8,7           | 8,6           |
| 10 30                      | 53,2         | 47,2          | 40,6          | 34,5          | 29,5          | 26,4          | 24,8          | 24,1          | 23,7          | 23,7          |                     | 30       | 30       | 14,1         | 14,6          | 14,8          | 14,3          | 13,0          | 11,2          | 9,4           | 8,1           | 7,5           | 7,4           |
| 10 40                      | 49,3         | 44,0          | 38,3          | 32,9          | 28,5          | 25,7          | 24,2          | 23,6          | 23,3          | 23,4          |                     | 40       | 40       | 12,9         | 13,5          | 13,7          | 13,1          | 11,9          | 10,0          | 8,1           | 6,8           | 6,2           | 6,1           |
| 10 50                      | 46,1         | 41,6          | 36,7          | 31,9          | 28,0          | 25,3          | 23,9          | 23,4          | 23,1          | 23,3          |                     | 50       | 50       | 12,1         | 12,7          | 12,8          | 12,3          | 10,9          | 9,1           | 7,2           | 5,8           | 5,2           | 5,1           |
| 10 60                      | 44,1         | 40,2          | 36,0          | 31,7          | 28,0          | 25,4          | 24,1          | 23,6          | 23,3          | 23,6          |                     | 60       | 60       | 11,6         | 12,3          | 12,4          | 11,8          | 10,5          | 8,6           | 6,8           | 5,4           | 4,7           | 4,6           |
| 10 70                      | 43,2         | 39,9          | 36,2          | 32,2          | 28,6          | 26,2          | 24,8          | 24,3          | 24,1          | 24,4          |                     | 70       | 70       | 11,8         | 12,4          | 12,5          | 12,0          | 10,7          | 8,8           | 6,9           | 5,5           | 4,9           | 4,7           |

|    |     |      |      |      |      |      |      |      |      |      |      |
|----|-----|------|------|------|------|------|------|------|------|------|------|
| 10 | 170 | 45,7 | 44,2 | 41,5 | 38,0 | 34,3 | 31,5 | 29,8 | 29,0 | 28,5 | 28,4 |
| 10 | 180 | 45,7 | 44,4 | 41,8 | 38,2 | 34,5 | 31,6 | 29,8 | 28,9 | 28,4 | 28,2 |
| 10 | 190 | 46,3 | 45,1 | 42,6 | 39,1 | 35,3 | 32,3 | 30,4 | 29,5 | 28,9 | 28,7 |
| 10 | 200 | 47,4 | 46,3 | 43,9 | 40,3 | 36,5 | 33,4 | 31,4 | 30,4 | 29,8 | 29,5 |
| 10 | 210 | 48,6 | 47,6 | 45,2 | 41,8 | 37,9 | 34,7 | 32,7 | 31,6 | 30,9 | 30,6 |
| 10 | 220 | 49,5 | 48,7 | 46,5 | 43,1 | 39,2 | 35,9 | 33,7 | 32,5 | 31,7 | 31,4 |
| 10 | 230 | 50,1 | 49,5 | 47,4 | 44,2 | 40,2 | 36,7 | 34,3 | 32,9 | 32,1 | 31,7 |
| 10 | 240 | 50,1 | 49,8 | 47,9 | 44,7 | 40,6 | 36,8 | 34,2 | 32,7 | 31,8 | 31,3 |
| 10 | 250 | 49,7 | 49,7 | 48,1 | 44,9 | 40,5 | 36,4 | 33,5 | 31,8 | 30,8 | 30,3 |
| 10 | 260 | 49,2 | 49,5 | 48,0 | 44,7 | 40,0 | 35,4 | 32,2 | 30,3 | 29,2 | 28,7 |
| 10 | 270 | 48,8 | 49,4 | 48,1 | 44,6 | 39,3 | 34,2 | 30,6 | 28,4 | 27,2 | 26,7 |
| 10 | 280 | 48,9 | 49,9 | 48,6 | 44,7 | 38,7 | 33,0 | 28,9 | 26,5 | 25,3 | 24,8 |
| 10 | 290 | 49,9 | 51,1 | 49,7 | 45,0 | 38,1 | 31,8 | 27,4 | 24,9 | 23,6 | 23,2 |
| 10 | 300 | 52,0 | 53,3 | 51,3 | 45,5 | 37,6 | 30,8 | 26,2 | 23,6 | 22,4 | 22,1 |
| 10 | 310 | 55,0 | 55,6 | 53,0 | 45,8 | 37,2 | 30,1 | 25,4 | 23,0 | 21,9 | 21,6 |
| 10 | 320 | 58,7 | 58,5 | 54,3 | 45,7 | 36,7 | 29,6 | 25,1 | 22,9 | 22,0 | 21,8 |
| 10 | 330 | 62,1 | 60,8 | 54,5 | 45,2 | 36,2 | 29,4 | 25,2 | 23,3 | 22,5 | 22,4 |
| 10 | 340 | 64,5 | 61,5 | 53,7 | 44,2 | 35,5 | 29,2 | 25,5 | 24,0 | 23,3 | 23,2 |
| 10 | 350 | 65,4 | 60,4 | 52,0 | 42,7 | 34,6 | 28,9 | 25,9 | 24,6 | 24,1 | 23,9 |
| 10 | 360 | 64,2 | 58,0 | 49,5 | 40,8 | 33,5 | 28,5 | 26,0 | 25,0 | 24,4 | 24,3 |
| 20 | 0   | 54,4 | 47,0 | 39,1 | 32,1 | 26,9 | 23,9 | 22,5 | 21,7 | 21,2 | 21,2 |
| 20 | 10  | 51,0 | 44,1 | 37,0 | 30,9 | 26,4 | 23,9 | 22,7 | 22,0 | 21,5 | 21,6 |
| 20 | 20  | 47,4 | 41,1 | 34,8 | 29,5 | 25,7 | 23,6 | 22,5 | 21,8 | 21,5 | 21,7 |
| 20 | 30  | 43,7 | 38,2 | 32,8 | 28,2 | 24,9 | 23,0 | 22,0 | 21,4 | 21,2 | 21,6 |
| 20 | 40  | 40,5 | 35,8 | 31,2 | 27,2 | 24,2 | 22,4 | 21,4 | 21,0 | 20,8 | 21,3 |
| 20 | 50  | 38,1 | 34,2 | 30,2 | 26,5 | 23,7 | 22,0 | 21,1 | 20,6 | 20,5 | 21,1 |
| 20 | 60  | 36,8 | 33,4 | 29,8 | 26,4 | 23,7 | 22,0 | 21,2 | 20,7 | 20,7 | 21,2 |
| 20 | 70  | 36,4 | 33,5 | 30,2 | 26,9 | 24,3 | 22,7 | 21,8 | 21,4 | 21,3 | 21,8 |
| 20 | 80  | 37,0 | 34,3 | 31,2 | 28,0 | 25,4 | 23,8 | 22,9 | 22,5 | 22,4 | 22,8 |
| 20 | 90  | 38,1 | 35,6 | 32,6 | 29,4 | 26,9 | 25,3 | 24,4 | 24,0 | 23,8 | 24,1 |
| 20 | 100 | 39,5 | 37,1 | 34,1 | 31,0 | 28,5 | 26,9 | 26,0 | 25,5 | 25,3 | 25,5 |
| 20 | 110 | 40,7 | 38,4 | 35,4 | 32,3 | 29,8 | 28,1 | 27,2 | 26,7 | 26,5 | 26,7 |
| 20 | 120 | 41,6 | 39,3 | 36,3 | 33,1 | 30,6 | 28,9 | 28,0 | 27,5 | 27,2 | 27,3 |
| 20 | 130 | 41,9 | 39,6 | 36,6 | 33,4 | 30,8 | 29,1 | 28,1 | 27,6 | 27,3 | 27,4 |
| 20 | 140 | 41,7 | 39,4 | 36,4 | 33,2 | 30,5 | 28,8 | 27,7 | 27,2 | 26,9 | 26,9 |
| 20 | 150 | 41,1 | 38,9 | 35,9 | 32,7 | 30,0 | 28,1 | 27,0 | 26,4 | 26,1 | 26,0 |
| 20 | 160 | 40,5 | 38,4 | 35,5 | 32,2 | 29,4 | 27,4 | 26,3 | 25,6 | 25,2 | 25,1 |
| 20 | 170 | 40,2 | 38,3 | 35,4 | 32,1 | 29,1 | 27,0 | 25,8 | 25,1 | 24,7 | 24,5 |
| 20 | 180 | 40,6 | 38,7 | 35,8 | 32,5 | 29,4 | 27,2 | 25,9 | 25,2 | 24,7 | 24,5 |
| 20 | 190 | 41,4 | 39,7 | 36,8 | 33,4 | 30,2 | 27,9 | 26,6 | 25,8 | 25,2 | 25,0 |
| 20 | 200 | 42,7 | 41,1 | 38,2 | 34,8 | 31,5 | 29,1 | 27,6 | 26,7 | 26,2 | 25,9 |
| 20 | 210 | 44,1 | 42,5 | 39,8 | 36,3 | 33,0 | 30,4 | 28,8 | 27,9 | 27,3 | 27,0 |
| 20 | 220 | 45,3 | 43,9 | 41,3 | 37,8 | 34,3 | 31,5 | 29,8 | 28,7 | 28,1 | 27,8 |
| 20 | 230 | 46,2 | 45,0 | 42,5 | 38,9 | 35,2 | 32,2 | 30,3 | 29,1 | 28,4 | 28,1 |
| 20 | 240 | 46,6 | 45,6 | 43,2 | 39,6 | 35,5 | 32,3 | 30,1 | 28,8 | 28,0 | 27,7 |
| 20 | 250 | 46,7 | 45,9 | 43,6 | 39,7 | 35,3 | 31,6 | 29,3 | 27,8 | 27,0 | 26,6 |
| 20 | 260 | 46,6 | 46,1 | 43,7 | 39,4 | 34,5 | 30,4 | 27,7 | 26,2 | 25,3 | 24,9 |
| 20 | 270 | 46,6 | 46,3 | 43,7 | 38,9 | 33,3 | 28,7 | 25,8 | 24,1 | 23,2 | 22,9 |
| 20 | 280 | 47,2 | 46,9 | 44,0 | 38,4 | 32,0 | 27,0 | 23,8 | 22,0 | 21,2 | 20,8 |
| 20 | 290 | 48,5 | 48,1 | 44,4 | 37,7 | 30,7 | 25,3 | 21,9 | 20,2 | 19,4 | 19,2 |
| 20 | 300 | 50,7 | 49,7 | 44,8 | 37,1 | 29,5 | 23,9 | 20,6 | 18,9 | 18,3 | 18,1 |
| 20 | 310 | 53,0 | 51,4 | 45,0 | 36,4 | 28,6 | 23,0 | 19,8 | 18,4 | 17,8 | 17,6 |
| 20 | 320 | 55,0 | 52,4 | 44,7 | 35,6 | 28,0 | 22,6 | 19,8 | 18,5 | 18,0 | 17,9 |
| 20 | 330 | 57,8 | 52,4 | 43,9 | 34,9 | 27,6 | 22,8 | 20,3 | 19,2 | 18,8 | 18,6 |
| 20 | 340 | 58,2 | 51,4 | 42,6 | 34,1 | 27,5 | 23,2 | 21,1 | 20,2 | 19,7 | 19,5 |
| 20 | 350 | 56,9 | 49,5 | 41,1 | 33,2 | 27,3 | 23,7 | 21,9 | 21,1 | 20,6 | 20,5 |

|     |     |      |      |      |      |      |      |      |      |      |      |
|-----|-----|------|------|------|------|------|------|------|------|------|------|
| 190 | 170 | 9,9  | 10,4 | 10,7 | 10,3 | 9,3  | 7,8  | 6,1  | 4,8  | 4,1  | 4,0  |
| 190 | 180 | 9,4  | 9,9  | 10,1 | 9,8  | 8,8  | 7,2  | 5,5  | 4,2  | 3,6  | 3,5  |
| 190 | 190 | 9,6  | 10,0 | 10,2 | 9,9  | 8,8  | 7,2  | 5,5  | 4,3  | 3,6  | 3,6  |
| 190 | 200 | 10,3 | 10,8 | 11,0 | 10,6 | 9,5  | 7,8  | 6,1  | 4,8  | 4,2  | 4,2  |
| 190 | 210 | 11,4 | 11,9 | 12,0 | 11,6 | 10,5 | 8,8  | 7,0  | 5,7  | 5,2  | 5,1  |
| 190 | 220 | 12,5 | 13,0 | 13,1 | 12,7 | 11,5 | 9,8  | 8,0  | 6,7  | 6,1  | 6,1  |
| 190 | 230 | 13,3 | 13,7 | 13,9 | 13,4 | 12,2 | 10,5 | 8,7  | 7,3  | 6,8  | 6,7  |
| 190 | 240 | 13,6 | 14,0 | 14,1 | 13,7 | 12,5 | 10,8 | 8,9  | 7,6  | 7,0  | 7,0  |
| 190 | 250 | 13,4 | 13,7 | 13,9 | 13,4 | 12,2 | 10,5 | 8,6  | 7,3  | 6,7  | 6,6  |
| 190 | 260 | 12,7 | 13,0 | 13,1 | 12,7 | 11,5 | 9,7  | 7,9  | 6,5  | 6,0  | 5,9  |
| 190 | 270 | 11,8 | 12,1 | 12,2 | 11,7 | 10,5 | 8,8  | 7,0  | 5,6  | 5,0  | 4,9  |
| 190 | 280 | 10,9 | 11,2 | 11,2 | 10,8 | 9,6  | 7,9  | 6,1  | 4,8  | 4,2  | 4,0  |
| 190 | 290 | 10,3 | 10,5 | 10,6 | 10,2 | 9,0  | 7,4  | 5,6  | 4,3  | 3,6  | 3,5  |
| 190 | 300 | 10,2 | 10,5 | 10,6 | 10,1 | 9,0  | 7,4  | 5,6  | 4,3  | 3,7  | 3,6  |
| 190 | 310 | 10,8 | 11,1 | 11,1 | 10,7 | 9,6  | 8,0  | 6,3  | 5,0  | 4,4  | 4,2  |
| 190 | 320 | 11,9 | 12,2 | 12,3 | 11,8 | 10,7 | 9,2  | 7,5  | 6,2  | 5,6  | 5,4  |
| 190 | 330 | 13,3 | 13,6 | 13,7 | 13,3 | 12,2 | 10,6 | 8,9  | 7,6  | 7,0  | 6,9  |
| 190 | 340 | 14,7 | 15,1 | 15,2 | 14,8 | 13,7 | 12,1 | 10,4 | 9,1  | 8,5  | 8,4  |
| 190 | 350 | 15,7 | 16,2 | 16,3 | 15,9 | 14,8 | 13,1 | 11,4 | 10,1 | 9,5  | 9,4  |
| 190 | 360 | 16,2 | 16,7 | 16,8 | 16,4 | 15,2 | 13,6 | 11,8 | 10,5 | 9,9  | 9,8  |
| 200 | 0   | 19,8 | 20,4 | 20,4 | 19,6 | 18,1 | 16,1 | 14,4 | 13,2 | 12,7 | 12,7 |
| 200 | 10  | 19,6 | 20,2 | 20,2 | 19,4 | 17,9 | 15,8 | 14,1 | 12,9 | 12,4 | 12,5 |
| 200 | 20  | 18,9 | 19,5 | 19,5 | 18,7 | 17,1 | 15,0 | 13,2 | 12,1 | 11,6 | 11,6 |
| 200 | 30  | 17,9 | 18,5 | 18,5 | 17,7 | 16,0 | 13,9 | 12,1 | 10,9 | 10,4 | 10,4 |
| 200 | 40  | 16,7 | 17,4 | 17,4 | 16,5 | 14,9 | 12,7 | 10,9 | 9,7  | 9,2  | 9,2  |
| 200 | 50  | 15,8 | 16,5 | 16,5 | 15,6 | 14,0 | 11,8 | 10,0 | 8,8  | 8,3  | 8,2  |
| 200 | 60  | 15,4 | 16,1 | 16,1 | 15,2 | 13,5 | 11,4 | 9,6  | 8,3  | 7,8  | 7,7  |
| 200 | 70  | 15,5 | 16,2 | 16,2 | 15,3 | 13,7 | 11,6 | 9,7  | 8,5  | 7,9  | 7,8  |
| 200 | 80  | 16,1 | 16,8 | 16,8 | 16,0 | 14,3 | 12,3 | 10,4 | 9,2  | 8,6  | 8,4  |
| 200 | 90  | 17,1 | 17,7 | 17,7 | 16,9 | 15,3 | 13,3 | 11,5 | 10,2 | 9,5  | 9,4  |
| 200 | 100 | 18,0 | 18,6 | 18,6 | 17,9 | 16,4 | 14,3 | 12,5 | 11,3 | 10,6 | 10,4 |
| 200 | 110 | 18,6 | 19,2 | 19,3 | 18,6 | 17,1 | 15,1 | 13,3 | 12,0 | 11,3 | 11,1 |
| 200 | 120 | 18,7 | 19,4 | 19,4 | 18,8 | 17,3 | 15,3 | 13,5 | 12,3 | 11,6 | 11,4 |
| 200 | 130 | 18,3 | 18,9 | 19,0 | 18,4 | 16,9 | 15,0 | 13,2 | 11,9 | 11,2 | 11,0 |
| 200 | 140 | 17,3 | 17,9 | 18,0 | 17,4 | 16,0 | 14,1 | 12,3 | 11,0 | 10,4 | 10,2 |
| 200 | 150 | 15,9 | 16,6 | 16,7 | 16,1 | 14,7 | 12,8 | 11,0 | 9,8  | 9,1  | 9,0  |
| 200 | 160 | 14,4 | 15,1 | 15,2 | 14,6 | 13,2 | 11,3 | 9,6  | 8,4  | 7,8  | 7,7  |
| 200 | 170 | 13,2 | 13,8 | 13,9 | 13,3 | 12,0 | 10,1 | 8,4  | 7,2  | 6,6  | 6,6  |
| 200 | 180 | 12,5 | 13,2 | 13,2 | 12,6 | 11,2 | 9,3  | 7,6  | 6,5  | 5,9  | 5,9  |
| 200 | 190 | 12,6 | 13,2 | 13,2 | 12,6 | 11,1 | 9,2  | 7,5  | 6,3  | 5,8  | 5,8  |
| 200 | 200 | 13,2 | 13,8 | 13,9 | 13,2 | 11,7 | 9,7  | 8,0  | 6,8  | 6,3  | 6,4  |
| 200 | 210 | 14,2 | 14,8 | 14,9 | 14,2 | 12,7 | 10,7 | 8,8  | 7,6  | 7,2  | 7,3  |
| 200 | 220 | 15,2 | 15,8 | 15,9 | 15,2 | 13,7 | 11,6 | 9,8  | 8,5  | 8,1  | 8,2  |
| 200 | 230 | 15,9 | 16,6 | 16,6 | 15,9 | 14,4 | 12,4 | 10,5 | 9,2  | 8,7  | 8,8  |
| 200 | 240 | 16,2 | 16,8 | 16,9 | 16,2 | 14,7 | 12,6 | 10,7 | 9,4  | 8,9  | 9,0  |
| 200 | 250 | 16,0 | 16,6 | 16,6 | 15,9 | 14,4 | 12,3 | 10,4 | 9,1  | 8,6  | 8,7  |
| 200 | 260 | 15,3 | 15,9 | 15,9 | 15,2 | 13,7 | 11,6 | 9,7  | 8,4  | 7,9  | 7,9  |
| 200 | 270 | 14,4 | 14,9 | 15,0 | 14,2 | 12,7 | 10,7 | 8,8  | 7,5  | 6,9  | 7,0  |
| 200 | 280 | 13,5 | 14,0 | 14,1 | 13,4 | 11,9 | 9,9  | 8,0  | 6,7  | 6,1  | 6,1  |
| 200 | 290 | 12,9 | 13,5 | 13,5 | 12,8 | 11,3 | 9,4  | 7,5  | 6,3  | 5,7  | 5,7  |
| 200 | 300 | 13,0 | 13,5 | 13,5 | 12,8 | 11,4 | 9,5  | 7,6  | 6,4  | 5,8  | 5,8  |
| 200 | 310 | 13,7 | 14,2 | 14,2 | 13,5 | 12,1 | 10,2 | 8,4  | 7,2  | 6,6  | 6,6  |
| 200 | 320 | 15,0 | 15,5 | 15,5 | 14,8 | 13,4 | 11,5 | 9,7  | 8,5  | 8,0  | 7,9  |
| 200 | 330 | 16,5 | 17,1 | 17,1 | 16,4 | 14,9 | 13,0 | 11,3 | 10,1 | 9,6  | 9,6  |
| 200 | 340 | 18,1 | 18,6 | 18,6 | 17,9 | 16,4 | 14,5 | 12,8 | 11,6 | 11,1 | 11,1 |
| 200 | 350 | 19,2 | 19,8 | 19,8 | 19,0 | 17,6 | 15,6 | 13,9 | 12,7 | 12,2 | 12,2 |

|    |     |      |      |      |      |      |      |      |      |      |      |
|----|-----|------|------|------|------|------|------|------|------|------|------|
| 20 | 360 | 54,4 | 47,0 | 39,1 | 32,1 | 26,9 | 23,9 | 22,5 | 21,7 | 21,2 | 21,2 |
| 30 | 0   | 42,0 | 35,1 | 28,8 | 23,9 | 20,7 | 19,0 | 18,2 | 17,4 | 17,0 | 17,4 |
| 30 | 10  | 39,2 | 33,1 | 27,6 | 23,4 | 20,8 | 19,4 | 18,6 | 17,9 | 17,7 | 18,2 |
| 30 | 20  | 36,2 | 30,9 | 26,2 | 22,7 | 20,5 | 19,2 | 18,6 | 18,0 | 17,8 | 18,6 |
| 30 | 30  | 33,4 | 28,9 | 24,9 | 21,9 | 19,9 | 18,7 | 18,1 | 17,6 | 17,6 | 18,4 |
| 30 | 40  | 31,0 | 27,2 | 23,8 | 21,0 | 19,2 | 18,1 | 17,5 | 17,1 | 17,1 | 18,0 |
| 30 | 50  | 29,3 | 26,1 | 23,0 | 20,5 | 18,7 | 17,6 | 17,1 | 16,7 | 16,7 | 17,5 |
| 30 | 60  | 28,5 | 25,7 | 22,8 | 20,4 | 18,7 | 17,6 | 17,1 | 16,7 | 16,6 | 17,4 |
| 30 | 70  | 28,6 | 26,0 | 23,3 | 20,9 | 19,2 | 18,2 | 17,6 | 17,2 | 17,1 | 17,7 |
| 30 | 80  | 29,3 | 26,8 | 24,2 | 21,9 | 20,3 | 19,2 | 18,6 | 18,1 | 18,0 | 18,5 |
| 30 | 90  | 30,5 | 28,1 | 25,6 | 23,2 | 21,6 | 20,6 | 19,9 | 19,4 | 19,3 | 19,6 |
| 30 | 100 | 31,9 | 29,5 | 26,9 | 24,6 | 23,0 | 22,0 | 21,3 | 20,8 | 20,5 | 20,8 |
| 30 | 110 | 33,1 | 30,7 | 28,1 | 25,7 | 24,2 | 23,1 | 22,4 | 21,8 | 21,6 | 21,8 |
| 30 | 120 | 33,8 | 31,4 | 28,7 | 26,4 | 24,8 | 23,7 | 23,0 | 22,4 | 22,1 | 22,3 |
| 30 | 130 | 34,0 | 31,6 | 28,9 | 26,5 | 24,9 | 23,8 | 23,0 | 22,5 | 22,1 | 22,2 |
| 30 | 140 | 33,7 | 31,3 | 28,6 | 26,2 | 24,5 | 23,3 | 22,6 | 21,9 | 21,5 | 21,6 |
| 30 | 150 | 33,1 | 30,8 | 28,1 | 25,7 | 23,8 | 22,5 | 21,8 | 21,1 | 20,7 | 20,7 |
| 30 | 160 | 32,7 | 30,4 | 27,7 | 25,2 | 23,2 | 21,8 | 21,0 | 20,3 | 19,9 | 19,8 |
| 30 | 170 | 32,6 | 30,4 | 27,7 | 25,0 | 22,9 | 21,4 | 20,6 | 19,9 | 19,3 | 19,2 |
| 30 | 180 | 33,1 | 31,0 | 28,2 | 25,4 | 23,1 | 21,6 | 20,7 | 19,9 | 19,4 | 19,2 |
| 30 | 190 | 34,1 | 32,0 | 29,2 | 26,3 | 23,9 | 22,3 | 21,3 | 20,5 | 19,9 | 19,7 |
| 30 | 200 | 35,6 | 33,5 | 30,7 | 27,7 | 25,1 | 23,4 | 22,3 | 21,4 | 20,9 | 20,7 |
| 30 | 210 | 37,1 | 35,2 | 32,4 | 29,2 | 26,5 | 24,6 | 23,4 | 22,5 | 21,9 | 21,7 |
| 30 | 220 | 38,6 | 36,7 | 34,0 | 30,7 | 27,8 | 25,6 | 24,3 | 23,3 | 22,7 | 22,4 |
| 30 | 230 | 39,8 | 38,1 | 35,2 | 31,7 | 28,6 | 26,2 | 24,7 | 23,6 | 23,0 | 22,7 |
| 30 | 240 | 40,6 | 39,0 | 36,1 | 32,3 | 28,7 | 26,1 | 24,5 | 23,3 | 22,6 | 22,3 |
| 30 | 250 | 41,0 | 39,5 | 36,4 | 32,2 | 28,2 | 25,3 | 23,5 | 22,2 | 21,5 | 21,1 |
| 30 | 260 | 41,3 | 39,8 | 36,3 | 31,6 | 27,1 | 23,8 | 21,8 | 20,5 | 19,8 | 19,4 |
| 30 | 270 | 41,7 | 40,0 | 36,0 | 30,5 | 25,4 | 21,8 | 19,7 | 18,4 | 17,7 | 17,4 |
| 30 | 280 | 42,4 | 40,4 | 35,5 | 29,2 | 23,6 | 19,7 | 17,5 | 16,3 | 15,6 | 15,4 |
| 30 | 290 | 43,7 | 40,8 | 34,9 | 27,7 | 21,8 | 17,8 | 15,6 | 14,5 | 13,9 | 13,7 |
| 30 | 300 | 45,2 | 41,2 | 34,1 | 26,4 | 20,3 | 16,3 | 14,3 | 13,3 | 12,8 | 12,6 |
| 30 | 310 | 46,8 | 41,3 | 33,2 | 25,3 | 19,4 | 15,6 | 13,8 | 12,8 | 12,4 | 12,3 |
| 30 | 320 | 47,6 | 40,8 | 32,3 | 24,6 | 19,0 | 15,6 | 14,1 | 13,2 | 12,7 | 12,6 |
| 30 | 330 | 47,5 | 39,9 | 31,5 | 24,3 | 19,2 | 16,3 | 15,0 | 14,1 | 13,6 | 13,5 |
| 30 | 340 | 46,4 | 38,6 | 30,7 | 24,2 | 19,7 | 17,3 | 16,2 | 15,3 | 14,8 | 14,8 |
| 30 | 350 | 44,5 | 37,0 | 29,8 | 24,1 | 20,3 | 18,3 | 17,3 | 16,5 | 16,0 | 16,1 |
| 30 | 360 | 42,0 | 35,1 | 28,8 | 23,9 | 20,7 | 19,0 | 18,2 | 17,4 | 17,0 | 17,4 |
| 40 | 0   | 30,0 | 24,5 | 20,1 | 17,3 | 15,6 | 14,7 | 14,0 | 13,3 | 13,1 | 14,0 |
| 40 | 10  | 27,9 | 23,3 | 19,7 | 17,4 | 16,0 | 15,2 | 14,6 | 14,0 | 14,0 | 15,0 |
| 40 | 20  | 25,8 | 22,0 | 19,0 | 17,1 | 15,9 | 15,2 | 14,6 | 14,2 | 14,3 | 15,4 |
| 40 | 30  | 23,8 | 20,6 | 18,1 | 16,4 | 15,3 | 14,7 | 14,2 | 13,8 | 14,0 | 15,0 |
| 40 | 40  | 22,0 | 19,4 | 17,1 | 15,6 | 14,7 | 14,0 | 13,5 | 13,2 | 13,4 | 14,3 |
| 40 | 50  | 20,9 | 18,5 | 16,5 | 15,1 | 14,2 | 13,5 | 13,0 | 12,7 | 12,8 | 13,6 |
| 40 | 60  | 20,4 | 18,3 | 16,4 | 15,0 | 14,1 | 13,4 | 12,9 | 12,5 | 12,5 | 13,2 |
| 40 | 70  | 20,7 | 18,6 | 16,8 | 15,5 | 14,6 | 13,9 | 13,3 | 12,9 | 12,8 | 13,3 |
| 40 | 80  | 21,5 | 19,5 | 17,7 | 16,5 | 15,6 | 14,8 | 14,2 | 13,7 | 13,5 | 13,9 |
| 40 | 90  | 22,7 | 20,7 | 19,0 | 17,7 | 16,8 | 16,1 | 15,4 | 14,9 | 14,6 | 14,8 |
| 40 | 100 | 23,9 | 21,9 | 20,2 | 18,9 | 18,1 | 17,3 | 16,6 | 16,0 | 15,7 | 15,8 |
| 40 | 110 | 25,0 | 22,9 | 21,1 | 19,9 | 19,1 | 18,3 | 17,6 | 16,9 | 16,6 | 16,6 |
| 40 | 120 | 25,5 | 23,4 | 21,6 | 20,4 | 19,5 | 18,8 | 18,1 | 17,4 | 17,0 | 17,0 |
| 40 | 130 | 25,5 | 23,5 | 21,7 | 20,4 | 19,4 | 18,7 | 18,0 | 17,3 | 16,8 | 16,7 |
| 40 | 140 | 25,2 | 23,1 | 21,3 | 19,9 | 18,9 | 18,1 | 17,4 | 16,7 | 16,2 | 16,1 |
| 40 | 150 | 24,6 | 22,6 | 20,7 | 19,2 | 18,1 | 17,2 | 16,5 | 15,8 | 15,3 | 15,1 |
| 40 | 160 | 24,2 | 22,2 | 20,2 | 18,6 | 17,3 | 16,4 | 15,7 | 14,9 | 14,4 | 14,2 |
| 40 | 170 | 24,2 | 22,2 | 20,0 | 18,3 | 16,9 | 16,0 | 15,2 | 14,4 | 13,8 | 13,6 |

|     |     |      |      |      |      |      |      |      |      |      |      |
|-----|-----|------|------|------|------|------|------|------|------|------|------|
| 200 | 360 | 19,8 | 20,4 | 20,4 | 19,6 | 18,1 | 16,1 | 14,4 | 13,2 | 12,7 | 12,7 |
| 210 | 0   | 24,6 | 25,1 | 24,7 | 23,6 | 21,6 | 19,5 | 17,8 | 17,0 | 16,7 | 16,8 |
| 210 | 10  | 24,5 | 25,0 | 24,6 | 23,4 | 21,4 | 19,3 | 17,6 | 16,8 | 16,5 | 16,6 |
| 210 | 20  | 23,8 | 24,3 | 23,9 | 22,7 | 20,7 | 18,5 | 16,8 | 16,0 | 15,7 | 15,8 |
| 210 | 30  | 22,7 | 23,2 | 22,9 | 21,6 | 19,6 | 17,3 | 15,7 | 14,9 | 14,6 | 14,7 |
| 210 | 40  | 21,5 | 22,0 | 21,7 | 20,5 | 18,4 | 16,2 | 14,5 | 13,7 | 13,3 | 13,4 |
| 210 | 50  | 20,5 | 21,0 | 20,7 | 19,5 | 17,4 | 15,2 | 13,6 | 12,7 | 12,3 | 12,3 |
| 210 | 60  | 19,9 | 20,5 | 20,2 | 19,0 | 16,9 | 14,7 | 13,1 | 12,2 | 11,8 | 11,7 |
| 210 | 70  | 20,0 | 20,5 | 20,2 | 19,0 | 17,0 | 14,9 | 13,2 | 12,3 | 11,8 | 11,7 |
| 210 | 80  | 20,5 | 21,1 | 20,8 | 19,6 | 17,7 | 15,5 | 13,9 | 12,9 | 12,4 | 12,2 |
| 210 | 90  | 21,5 | 22,0 | 21,7 | 20,6 | 18,7 | 16,5 | 14,9 | 13,9 | 13,3 | 13,2 |
| 210 | 100 | 22,4 | 22,9 | 22,7 | 21,6 | 19,7 | 17,6 | 15,9 | 14,9 | 14,3 | 14,1 |
| 210 | 110 | 23,0 | 23,6 | 23,4 | 22,3 | 20,4 | 18,3 | 16,7 | 15,6 | 15,0 | 14,9 |
| 210 | 120 | 23,2 | 23,8 | 23,6 | 22,6 | 20,7 | 18,6 | 16,9 | 15,8 | 15,3 | 15,1 |
| 210 | 130 | 22,8 | 23,3 | 23,2 | 22,2 | 20,3 | 18,2 | 16,5 | 15,5 | 14,9 | 14,8 |
| 210 | 140 | 21,7 | 22,3 | 22,2 | 21,2 | 19,4 | 17,3 | 15,6 | 14,5 | 14,0 | 13,9 |
| 210 | 150 | 20,3 | 20,9 | 20,7 | 19,8 | 18,0 | 15,9 | 14,2 | 13,2 | 12,7 | 12,6 |
| 210 | 160 | 18,8 | 19,4 | 19,2 | 18,2 | 16,5 | 14,4 | 12,7 | 11,7 | 11,3 | 11,2 |
| 210 | 170 | 17,5 | 18,0 | 17,9 | 16,9 | 15,1 | 13,0 | 11,4 | 10,4 | 10,0 | 10,0 |
| 210 | 180 | 16,8 | 17,3 | 17,1 | 16,1 | 14,3 | 12,2 | 10,5 | 9,6  | 9,3  | 9,3  |
| 210 | 190 | 16,7 | 17,3 | 17,0 | 16,0 | 14,2 | 12,0 | 10,3 | 9,5  | 9,1  | 9,2  |
| 210 | 200 | 17,4 | 17,9 | 17,6 | 16,6 | 14,7 | 12,5 | 10,8 | 9,9  | 9,6  | 9,7  |
| 210 | 210 | 18,3 | 18,8 | 18,6 | 17,6 | 15,6 | 13,4 | 11,7 | 10,8 | 10,4 | 10,6 |
| 210 | 220 | 19,3 | 19,9 | 19,7 | 18,6 | 16,6 | 14,4 | 12,6 | 11,7 | 11,3 | 11,5 |
| 210 | 230 | 20,0 | 20,6 | 20,4 | 19,4 | 17,4 | 15,1 | 13,3 | 12,4 | 12,0 | 12,2 |
| 210 | 240 | 20,3 | 20,9 | 20,7 | 19,6 | 17,7 | 15,4 | 13,6 | 12,6 | 12,2 | 12,4 |
| 210 | 250 | 20,1 | 20,6 | 20,4 | 19,4 | 17,4 | 15,1 | 13,3 | 12,3 | 11,9 | 12,0 |
| 210 | 260 | 19,3 | 19,9 | 19,7 | 18,7 | 16,7 | 14,4 | 12,6 | 11,5 | 11,1 | 11,3 |
| 210 | 270 | 18,4 | 19,0 | 18,8 | 17,7 | 15,8 | 13,5 | 11,7 | 10,6 | 10,2 | 10,3 |
| 210 | 280 | 17,6 | 18,1 | 17,9 | 16,9 | 15,0 | 12,7 | 10,9 | 9,9  | 9,4  | 9,5  |
| 210 | 290 | 17,1 | 17,6 | 17,4 | 16,4 | 14,5 | 12,3 | 10,5 | 9,5  | 9,0  | 9,1  |
| 210 | 300 | 17,2 | 17,7 | 17,5 | 16,4 | 14,6 | 12,5 | 10,7 | 9,7  | 9,3  | 9,4  |
| 210 | 310 | 18,1 | 18,5 | 18,3 | 17,2 | 15,4 | 13,3 | 11,6 | 10,6 | 10,2 | 10,2 |
| 210 | 320 | 19,5 | 19,9 | 19,6 | 18,6 | 16,8 | 14,7 | 13,0 | 12,0 | 11,6 | 11,7 |
| 210 | 330 | 21,2 | 21,6 | 21,3 | 20,3 | 18,4 | 16,3 | 14,7 | 13,7 | 13,4 | 13,4 |
| 210 | 340 | 22,8 | 23,2 | 22,9 | 21,8 | 20,0 | 17,9 | 16,3 | 15,3 | 15,0 | 15,1 |
| 210 | 350 | 24,0 | 24,5 | 24,1 | 23,0 | 21,1 | 19,0 | 17,4 | 16,5 | 16,2 | 16,3 |
| 210 | 360 | 24,6 | 25,1 | 24,7 | 23,6 | 21,6 | 19,5 | 17,8 | 17,0 | 16,7 | 16,8 |
| 220 | 0   | 29,4 | 29,5 | 28,8 | 27,2 | 24,9 | 22,9 | 21,5 | 21,1 | 20,9 | 21,1 |
| 220 | 10  | 29,3 | 29,4 | 28,6 | 27,0 | 24,8 | 22,7 | 21,4 | 20,9 | 20,8 | 21,0 |
| 220 | 20  | 28,5 | 28,7 | 27,9 | 26,3 | 24,0 | 21,9 | 20,6 | 20,2 | 20,0 | 20,2 |
| 220 | 30  | 27,3 | 27,5 | 26,7 | 25,1 | 22,8 | 20,7 | 19,5 | 19,0 | 18,8 | 18,9 |
| 220 | 40  | 25,9 | 26,2 | 25,4 | 23,8 | 21,5 | 19,5 | 18,2 | 17,7 | 17,5 | 17,5 |
| 220 | 50  | 24,8 | 25,0 | 24,3 | 22,7 | 20,4 | 18,4 | 17,2 | 16,6 | 16,3 | 16,3 |
| 220 | 60  | 24,0 | 24,2 | 23,6 | 22,0 | 19,8 | 17,9 | 16,6 | 16,0 | 15,6 | 15,5 |
| 220 | 70  | 23,9 | 24,2 | 23,5 | 22,0 | 19,8 | 17,9 | 16,6 | 15,9 | 15,5 | 15,4 |
| 220 | 80  | 24,4 | 24,7 | 24,1 | 22,5 | 20,4 | 18,4 | 17,1 | 16,4 | 16,0 | 15,8 |
| 220 | 90  | 25,3 | 25,6 | 25,0 | 23,5 | 21,4 | 19,4 | 18,0 | 17,3 | 16,8 | 16,6 |
| 220 | 100 | 26,3 | 26,5 | 26,0 | 24,5 | 22,4 | 20,4 | 19,0 | 18,2 | 17,7 | 17,5 |
| 220 | 110 | 27,0 | 27,3 | 26,7 | 25,2 | 23,1 | 21,1 | 19,7 | 18,9 | 18,4 | 18,3 |
| 220 | 120 | 27,2 | 27,5 | 27,0 | 25,5 | 23,4 | 21,4 | 19,9 | 19,1 | 18,6 | 18,5 |
| 220 | 130 | 26,9 | 27,2 | 26,6 | 25,2 | 23,0 | 21,0 | 19,5 | 18,7 | 18,3 | 18,2 |
| 220 | 140 | 25,9 | 26,2 | 25,7 | 24,2 | 22,1 | 20,0 | 18,5 | 17,8 | 17,4 | 17,4 |
| 220 | 150 | 24,5 | 24,8 | 24,3 | 22,8 | 20,7 | 18,6 | 17,1 | 16,4 | 16,1 | 16,1 |
| 220 | 160 | 23,0 | 23,2 | 22,7 | 21,3 | 19,2 | 17,0 | 15,6 | 14,9 | 14,7 | 14,7 |
| 220 | 170 | 21,7 | 21,9 | 21,4 | 20,0 | 17,8 | 15,7 | 14,3 | 13,6 | 13,4 | 13,5 |

|    |     |      |      |      |      |      |      |      |      |      |      |     |     |      |      |      |      |      |      |      |      |      |      |
|----|-----|------|------|------|------|------|------|------|------|------|------|-----|-----|------|------|------|------|------|------|------|------|------|------|
| 40 | 180 | 24,7 | 22,7 | 20,4 | 18,5 | 17,1 | 16,0 | 15,2 | 14,4 | 13,8 | 13,6 | 220 | 180 | 21,0 | 21,2 | 20,7 | 19,2 | 17,0 | 14,9 | 13,5 | 12,9 | 12,7 | 12,9 |
| 40 | 190 | 25,8 | 23,7 | 21,4 | 19,3 | 17,7 | 16,6 | 15,7 | 14,9 | 14,3 | 14,0 | 220 | 190 | 21,0 | 21,3 | 20,7 | 19,2 | 16,9 | 14,8 | 13,4 | 12,8 | 12,7 | 12,8 |
| 40 | 200 | 27,3 | 25,2 | 22,8 | 20,6 | 18,8 | 17,5 | 16,6 | 15,7 | 15,1 | 14,8 | 220 | 200 | 21,7 | 21,9 | 21,4 | 19,8 | 17,5 | 15,3 | 13,9 | 13,3 | 13,2 | 13,4 |
| 40 | 210 | 28,9 | 26,9 | 24,4 | 21,9 | 20,0 | 18,6 | 17,6 | 16,7 | 16,0 | 15,8 | 220 | 210 | 22,7 | 23,0 | 22,4 | 20,8 | 18,5 | 16,4 | 14,9 | 14,3 | 14,1 | 14,4 |
| 40 | 220 | 30,6 | 28,5 | 25,9 | 23,2 | 21,1 | 19,5 | 18,4 | 17,4 | 16,8 | 16,5 | 220 | 220 | 23,8 | 24,1 | 23,5 | 21,9 | 19,6 | 17,4 | 15,9 | 15,3 | 15,1 | 15,4 |
| 40 | 230 | 32,0 | 30,0 | 27,1 | 24,1 | 21,7 | 19,9 | 18,7 | 17,7 | 17,0 | 16,7 | 220 | 230 | 24,6 | 24,9 | 24,3 | 22,7 | 20,4 | 18,1 | 16,6 | 16,0 | 15,8 | 16,0 |
| 40 | 240 | 33,1 | 30,9 | 27,7 | 24,4 | 21,6 | 19,7 | 18,4 | 17,3 | 16,6 | 16,2 | 220 | 240 | 24,8 | 25,1 | 24,6 | 23,0 | 20,7 | 18,4 | 16,8 | 16,2 | 16,0 | 16,2 |
| 40 | 250 | 33,8 | 31,4 | 27,8 | 24,0 | 20,9 | 18,7 | 17,3 | 16,2 | 15,4 | 15,1 | 220 | 250 | 24,6 | 24,9 | 24,3 | 22,8 | 20,4 | 18,1 | 16,5 | 15,9 | 15,6 | 15,9 |
| 40 | 260 | 34,2 | 31,6 | 27,4 | 22,9 | 19,4 | 17,1 | 15,6 | 14,5 | 13,8 | 13,4 | 220 | 260 | 23,9 | 24,2 | 23,6 | 22,1 | 19,7 | 17,4 | 15,8 | 15,1 | 14,9 | 15,1 |
| 40 | 270 | 34,6 | 31,4 | 26,4 | 21,3 | 17,5 | 15,0 | 13,5 | 12,4 | 11,7 | 11,4 | 220 | 270 | 22,9 | 23,2 | 22,7 | 21,2 | 18,8 | 16,6 | 15,0 | 14,3 | 14,0 | 14,2 |
| 40 | 280 | 35,0 | 30,9 | 25,1 | 19,5 | 15,4 | 12,9 | 11,4 | 10,4 | 9,7  | 9,5  | 220 | 280 | 22,1 | 22,4 | 21,8 | 20,3 | 18,0 | 15,8 | 14,2 | 13,5 | 13,2 | 13,4 |
| 40 | 290 | 35,5 | 30,3 | 23,7 | 17,7 | 13,5 | 11,0 | 9,6  | 8,7  | 8,1  | 7,9  | 220 | 290 | 21,6 | 21,9 | 21,3 | 19,8 | 17,6 | 15,4 | 13,9 | 13,1 | 12,8 | 13,0 |
| 40 | 300 | 35,9 | 29,5 | 22,3 | 16,2 | 12,1 | 9,7  | 8,5  | 7,7  | 7,1  | 6,9  | 220 | 300 | 21,8 | 22,0 | 21,4 | 20,0 | 17,8 | 15,6 | 14,1 | 13,4 | 13,1 | 13,3 |
| 40 | 310 | 35,8 | 28,6 | 21,2 | 15,3 | 11,4 | 9,3  | 8,2  | 7,4  | 6,9  | 6,7  | 220 | 310 | 22,7 | 22,9 | 22,3 | 20,8 | 18,7 | 16,5 | 15,0 | 14,4 | 14,1 | 14,3 |
| 40 | 320 | 35,3 | 27,7 | 20,5 | 15,1 | 11,6 | 9,8  | 8,8  | 8,0  | 7,4  | 7,3  | 220 | 320 | 24,2 | 24,3 | 23,7 | 22,3 | 20,1 | 18,0 | 16,5 | 15,9 | 15,6 | 15,8 |
| 40 | 330 | 34,4 | 26,9 | 20,2 | 15,4 | 12,4 | 10,9 | 9,9  | 9,1  | 8,5  | 8,6  | 220 | 330 | 25,9 | 26,1 | 25,4 | 23,9 | 21,8 | 19,7 | 18,2 | 17,6 | 17,4 | 17,6 |
| 40 | 340 | 33,2 | 26,2 | 20,2 | 16,1 | 13,6 | 12,3 | 11,4 | 10,6 | 10,1 | 10,4 | 220 | 340 | 27,6 | 27,7 | 27,0 | 25,5 | 23,3 | 21,2 | 19,8 | 19,3 | 19,1 | 19,3 |
| 40 | 350 | 31,7 | 25,5 | 20,3 | 16,8 | 14,8 | 13,7 | 12,8 | 12,1 | 11,7 | 12,3 | 220 | 350 | 28,8 | 28,9 | 28,2 | 26,7 | 24,4 | 22,4 | 21,0 | 20,5 | 20,3 | 20,6 |
| 40 | 360 | 30,0 | 24,5 | 20,1 | 17,3 | 15,6 | 14,7 | 14,0 | 13,3 | 13,1 | 14,0 | 220 | 360 | 29,4 | 29,5 | 28,8 | 27,2 | 24,9 | 22,9 | 21,5 | 21,1 | 20,9 | 21,1 |
| 50 | 0   | 20,2 | 16,7 | 14,5 | 13,3 | 12,6 | 12,0 | 11,2 | 10,5 | 10,6 | 11,8 | 230 | 0   | 32,7 | 32,5 | 31,3 | 29,4 | 27,0 | 25,2 | 24,4 | 24,2 | 24,3 | 24,5 |
| 50 | 10  | 19,1 | 16,3 | 14,6 | 13,6 | 13,0 | 12,6 | 11,9 | 11,4 | 11,6 | 12,8 | 230 | 10  | 32,5 | 32,3 | 31,1 | 29,1 | 26,8 | 25,1 | 24,2 | 24,1 | 24,1 | 24,4 |
| 50 | 20  | 17,7 | 15,5 | 14,1 | 13,4 | 12,9 | 12,5 | 11,9 | 11,4 | 11,7 | 12,9 | 230 | 20  | 31,6 | 31,4 | 30,2 | 28,2 | 26,0 | 24,3 | 23,5 | 23,4 | 23,3 | 23,5 |
| 50 | 30  | 16,3 | 14,5 | 13,4 | 12,8 | 12,4 | 12,0 | 11,4 | 11,0 | 11,2 | 12,3 | 230 | 30  | 30,3 | 30,1 | 28,9 | 26,9 | 24,7 | 23,1 | 22,3 | 22,1 | 22,0 | 22,1 |
| 50 | 40  | 15,0 | 13,5 | 12,6 | 12,1 | 11,7 | 11,3 | 10,6 | 10,2 | 10,4 | 11,3 | 230 | 40  | 28,7 | 28,5 | 27,4 | 25,5 | 23,3 | 21,7 | 21,0 | 20,7 | 20,5 | 20,5 |
| 50 | 50  | 14,2 | 12,8 | 12,0 | 11,6 | 11,1 | 10,7 | 10,0 | 9,6  | 9,6  | 10,3 | 230 | 50  | 27,3 | 27,2 | 26,1 | 24,2 | 22,1 | 20,6 | 19,7 | 19,4 | 19,2 | 19,0 |
| 50 | 60  | 13,9 | 12,7 | 11,9 | 11,5 | 11,1 | 10,6 | 9,8  | 9,3  | 9,2  | 9,7  | 230 | 60  | 26,4 | 26,3 | 25,3 | 23,5 | 21,4 | 19,9 | 19,0 | 18,5 | 18,2 | 18,0 |
| 50 | 70  | 14,2 | 13,1 | 12,4 | 12,0 | 11,5 | 11,0 | 10,2 | 9,5  | 9,3  | 9,6  | 230 | 70  | 26,2 | 26,1 | 25,1 | 23,3 | 21,3 | 19,8 | 18,8 | 18,3 | 17,9 | 17,7 |
| 50 | 80  | 15,1 | 13,9 | 13,3 | 12,9 | 12,4 | 11,8 | 11,0 | 10,2 | 9,9  | 10,0 | 230 | 80  | 26,6 | 26,6 | 25,6 | 23,8 | 21,8 | 20,2 | 19,2 | 18,6 | 18,2 | 18,0 |
| 50 | 90  | 16,2 | 15,0 | 14,4 | 14,1 | 13,6 | 13,0 | 12,1 | 11,3 | 10,8 | 10,8 | 230 | 90  | 27,5 | 27,4 | 26,5 | 24,7 | 22,7 | 21,1 | 20,0 | 19,4 | 18,9 | 18,7 |
| 50 | 100 | 17,3 | 16,1 | 15,5 | 15,2 | 14,7 | 14,1 | 13,2 | 12,3 | 11,8 | 11,7 | 230 | 100 | 28,5 | 28,4 | 27,5 | 25,7 | 23,7 | 22,0 | 20,9 | 20,2 | 19,8 | 19,6 |
| 50 | 110 | 18,1 | 16,9 | 16,4 | 16,1 | 15,6 | 14,9 | 14,0 | 13,1 | 12,6 | 12,4 | 230 | 110 | 29,3 | 29,2 | 28,3 | 26,5 | 24,4 | 22,7 | 21,5 | 20,9 | 20,4 | 20,3 |
| 50 | 120 | 18,5 | 17,3 | 16,7 | 16,4 | 15,9 | 15,3 | 14,4 | 13,5 | 12,9 | 12,7 | 230 | 120 | 29,6 | 29,6 | 28,6 | 26,8 | 24,7 | 22,9 | 21,7 | 21,1 | 20,7 | 20,6 |
| 50 | 130 | 18,4 | 17,2 | 16,6 | 16,2 | 15,7 | 15,1 | 14,2 | 13,2 | 12,6 | 12,4 | 230 | 130 | 29,4 | 29,3 | 28,3 | 26,5 | 24,3 | 22,5 | 21,3 | 20,7 | 20,4 | 20,4 |
| 50 | 140 | 17,9 | 16,7 | 16,0 | 15,6 | 15,0 | 14,4 | 13,5 | 12,6 | 11,9 | 11,7 | 230 | 140 | 28,5 | 28,4 | 27,5 | 25,6 | 23,4 | 21,5 | 20,3 | 19,8 | 19,5 | 19,6 |
| 50 | 150 | 17,3 | 16,1 | 15,2 | 14,7 | 14,1 | 13,4 | 12,5 | 11,6 | 10,9 | 10,7 | 230 | 150 | 27,2 | 27,1 | 26,1 | 24,3 | 22,0 | 20,1 | 18,9 | 18,5 | 18,3 | 18,4 |
| 50 | 160 | 16,8 | 15,5 | 14,5 | 13,8 | 13,2 | 12,5 | 11,6 | 10,6 | 10,0 | 9,7  | 230 | 160 | 25,8 | 25,7 | 24,7 | 22,8 | 20,5 | 18,6 | 17,5 | 17,0 | 16,9 | 17,1 |
| 50 | 170 | 16,7 | 15,3 | 14,1 | 13,3 | 12,6 | 11,9 | 10,9 | 10,0 | 9,3  | 9,0  | 230 | 170 | 24,6 | 24,5 | 23,5 | 21,6 | 19,3 | 17,3 | 16,2 | 15,9 | 15,8 | 16,0 |
| 50 | 180 | 17,1 | 15,6 | 14,3 | 13,3 | 12,5 | 11,7 | 10,7 | 9,8  | 9,1  | 8,8  | 230 | 180 | 24,1 | 24,0 | 22,9 | 21,0 | 18,6 | 16,7 | 15,6 | 15,3 | 15,3 | 15,5 |
| 50 | 190 | 18,0 | 16,5 | 15,0 | 13,9 | 12,9 | 12,1 | 11,1 | 10,1 | 9,4  | 9,1  | 230 | 190 | 24,3 | 24,1 | 23,1 | 21,1 | 18,7 | 16,7 | 15,7 | 15,4 | 15,4 | 15,7 |
| 50 | 200 | 19,5 | 17,8 | 16,2 | 14,9 | 13,8 | 12,9 | 11,8 | 10,8 | 10,1 | 9,8  | 230 | 200 | 25,1 | 25,0 | 23,9 | 21,8 | 19,4 | 17,4 | 16,4 | 16,1 | 16,2 | 16,5 |
| 50 | 210 | 21,2 | 19,4 | 17,6 | 16,1 | 14,8 | 13,8 | 12,7 | 11,6 | 10,9 | 10,6 | 230 | 210 | 26,2 | 26,1 | 25,0 | 23,0 | 20,5 | 18,6 | 17,5 | 17,2 | 17,2 | 17,6 |
| 50 | 220 | 22,9 | 21,0 | 18,9 | 17,1 | 15,7 | 14,6 | 13,4 | 12,3 | 11,5 | 11,1 | 230 | 220 | 27,4 | 27,3 | 26,2 | 24,1 | 21,7 | 19,7 | 18,6 | 18,3 | 18,3 | 18,6 |
| 50 | 230 | 24,4 | 22,2 | 19,8 | 17,7 | 16,1 | 14,9 | 13,6 | 12,5 | 11,7 | 11,3 | 230 | 230 | 28,2 | 28,1 | 27,0 | 25,0 | 22,5 | 20,5 | 19,4 | 19,0 | 19,0 | 19,4 |
| 50 | 240 | 25,5 | 23,0 | 20,2 | 17,8 | 15,9 | 14,5 | 13,2 | 12,1 | 11,3 | 10,9 | 230 | 240 | 28,5 | 28,4 | 27,4 | 25,3 | 22,8 | 20,8 | 19,6 | 19,3 | 19,3 | 19,6 |
| 50 | 250 | 26,1 | 23,2 | 19,9 | 17,1 | 15,0 | 13,5 | 12,1 | 11,0 | 10,2 | 9,8  | 230 | 250 | 28,3 | 28,2 | 27,1 | 25,1 | 22,6 | 20,5 | 19,3 | 19,0 | 18,9 | 19,2 |
| 50 | 260 | 26,3 | 22,9 | 19,0 | 15,7 | 13,4 | 11,9 | 10,5 | 9,4  | 8,6  | 8,2  | 230 | 260 | 27,6 | 27,5 | 26,4 | 24,4 | 21,9 | 19,8 | 18,6 | 18,2 | 18,2 | 18,5 |
| 50 | 270 | 26,3 | 22,0 | 17,5 | 13,9 | 11,4 | 9,8  | 8,5  | 7,4  | 6,6  | 6,3  | 230 | 270 | 26,7 | 26,6 | 25,5 | 23,5 | 21,0 | 19,0 | 17,7 | 17,3 | 17,2 | 17,5 |
| 50 | 280 | 25,9 | 20,8 | 15,7 | 11,9 | 9,4  | 7,8  | 6,6  | 5,6  | 4,8  | 4,5  | 230 | 280 | 25,8 | 25,7 | 24,7 | 22,7 | 20,2 | 18,2 | 17,0 | 16,5 | 16,4 | 16,7 |
| 50 | 290 | 25,4 | 19,5 | 14,0 | 10,1 | 7,6  | 6,2  | 5,0  | 4,0  | 3,3  | 3,1  | 230 | 290 | 25,3 | 25,2 | 24,2 | 22,3 | 19,8 | 17,8 | 16,6 | 16,1 | 16,0 | 16,3 |
| 50 | 300 | 24,6 | 18,2 | 12,6 | 8,8  | 6,5  | 5,3  | 4,1  | 3,2  | 2,5  | 2,3  | 230 | 300 | 25,5 | 25,3 | 24,3 | 22,4 | 20,0 | 18,0 | 16,8 | 16,4 | 16,3 | 16,6 |
| 50 | 310 | 23,8 | 17,1 | 11,8 | 8,4  | 6,3  | 5,2  | 4,1  | 3,1  | 2,5  | 2,4  | 230 | 310 | 26,4 | 26,2 | 25,2 | 23,3 | 20,9 | 18,9 | 17,8 | 17,4 | 17,3 | 17,6 |
| 50 | 320 | 23,0 | 16,6 | 11,8 | 8,8  | 7,0  | 6,0  | 4,9  | 3,9  | 3,3  | 3,5  | 230 | 320 | 27,8 | 27,6 | 26,6 | 24,7 | 22,3 | 20,4 | 19,3 | 18,9 | 18,9 | 19,2 |
| 50 | 330 | 22,4 | 16,5 | 12,3 | 9,8  | 8,3  | 7,4  | 6,4  | 5,4  | 4,9  | 5,3  | 230 | 330 | 29,5 | 29,3 | 28,2 | 26,3 | 23,9 | 22,1 | 21,0 | 20,7 | 20,7 | 21,0 |
| 50 | 340 | 21,8 | 16,7 | 13,1 | 11,1 | 9,9  | 9,1  | 8,1  | 7,2  | 6,9  | 7,7  | 230 | 340 | 31,1 | 30,9 | 29,7 | 27,8 | 25,4 | 23,6 | 22,6 | 22,4 | 22,4 | 22,7 |
| 50 | 350 | 21,1 | 16,8 | 13,9 | 12,4 | 11,4 | 10,8 | 9,9  | 9,0  | 9,0  | 10,0 | 230 | 350 | 32,2 | 32,0 | 30,8 | 28,9 | 26,5 | 24,7 | 23,8 | 23,6 | 23,7 | 24,0 |
| 50 | 360 | 20,2 | 16,7 | 14,5 | 13,3 | 12,6 | 12,0 | 11,2 | 10,5 | 10,6 | 11,8 | 230 | 360 | 32,7 | 32,5 | 31,3 | 29,4 | 27,0 | 25,2 | 24,4 | 24,2 | 24,3 | 24,5 |

|    |     |      |      |      |      |      |      |      |      |      |      |
|----|-----|------|------|------|------|------|------|------|------|------|------|
| 60 | 0   | 14,5 | 13,1 | 12,5 | 12,3 | 11,9 | 11,2 | 10,4 | 9,8  | 10,1 | 11,4 |
| 60 | 10  | 14,0 | 13,1 | 12,8 | 12,7 | 12,3 | 11,8 | 11,1 | 10,5 | 10,8 | 12,1 |
| 60 | 20  | 13,2 | 12,6 | 12,5 | 12,5 | 12,2 | 11,7 | 10,9 | 10,5 | 10,8 | 11,9 |
| 60 | 30  | 12,2 | 11,8 | 11,8 | 11,9 | 11,6 | 11,0 | 10,3 | 9,8  | 10,0 | 10,9 |
| 60 | 40  | 11,2 | 10,9 | 11,1 | 11,1 | 10,8 | 10,3 | 9,5  | 8,9  | 8,9  | 9,6  |
| 60 | 50  | 10,5 | 10,3 | 10,6 | 10,6 | 10,3 | 9,6  | 8,8  | 8,1  | 8,0  | 8,4  |
| 60 | 60  | 10,3 | 10,2 | 10,5 | 10,5 | 10,1 | 9,4  | 8,5  | 7,7  | 7,4  | 7,6  |
| 60 | 70  | 10,7 | 10,7 | 11,0 | 11,0 | 10,5 | 9,8  | 8,7  | 7,9  | 7,5  | 7,5  |
| 60 | 80  | 11,5 | 11,5 | 11,8 | 11,9 | 11,4 | 10,6 | 9,5  | 8,5  | 8,0  | 7,9  |
| 60 | 90  | 12,5 | 12,6 | 12,9 | 13,0 | 12,5 | 11,6 | 10,5 | 9,5  | 8,9  | 8,7  |
| 60 | 100 | 13,5 | 13,6 | 14,0 | 14,0 | 13,5 | 12,7 | 11,5 | 10,5 | 9,8  | 9,5  |
| 60 | 110 | 14,2 | 14,3 | 14,7 | 14,8 | 14,3 | 13,4 | 12,3 | 11,2 | 10,5 | 10,2 |
| 60 | 120 | 14,5 | 14,6 | 15,0 | 15,0 | 14,6 | 13,7 | 12,6 | 11,5 | 10,7 | 10,4 |
| 60 | 130 | 14,3 | 14,3 | 14,7 | 14,7 | 14,3 | 13,4 | 12,3 | 11,2 | 10,4 | 10,1 |
| 60 | 140 | 13,6 | 13,7 | 13,9 | 13,9 | 13,5 | 12,6 | 11,5 | 10,4 | 9,7  | 9,4  |
| 60 | 150 | 12,8 | 12,7 | 12,9 | 12,9 | 12,4 | 11,6 | 10,4 | 9,4  | 8,6  | 8,3  |
| 60 | 160 | 12,1 | 11,8 | 11,9 | 11,8 | 11,3 | 10,4 | 9,3  | 8,3  | 7,5  | 7,2  |
| 60 | 170 | 11,7 | 11,3 | 11,2 | 11,0 | 10,5 | 9,6  | 8,5  | 7,4  | 6,6  | 6,3  |
| 60 | 180 | 11,8 | 11,3 | 11,1 | 10,8 | 10,2 | 9,3  | 8,1  | 7,0  | 6,2  | 5,9  |
| 60 | 190 | 12,6 | 11,9 | 11,5 | 11,1 | 10,4 | 9,5  | 8,3  | 7,1  | 6,3  | 6,0  |
| 60 | 200 | 13,9 | 13,0 | 12,4 | 11,9 | 11,1 | 10,1 | 8,8  | 7,7  | 6,8  | 6,4  |
| 60 | 210 | 15,4 | 14,4 | 13,5 | 12,8 | 11,9 | 10,8 | 9,5  | 8,4  | 7,5  | 7,1  |
| 60 | 220 | 17,0 | 15,7 | 14,6 | 13,6 | 12,6 | 11,5 | 10,1 | 8,9  | 8,0  | 7,6  |
| 60 | 230 | 18,3 | 16,6 | 15,2 | 14,0 | 12,9 | 11,7 | 10,3 | 9,1  | 8,2  | 7,7  |
| 60 | 240 | 19,2 | 17,1 | 15,3 | 13,9 | 12,6 | 11,3 | 9,9  | 8,7  | 7,8  | 7,3  |
| 60 | 250 | 19,4 | 16,9 | 14,6 | 13,0 | 11,6 | 10,3 | 8,9  | 7,7  | 6,8  | 6,3  |
| 60 | 260 | 19,2 | 16,0 | 13,4 | 11,6 | 10,1 | 8,7  | 7,4  | 6,2  | 5,3  | 4,9  |
| 60 | 270 | 18,5 | 14,7 | 11,7 | 9,7  | 8,3  | 6,9  | 5,6  | 4,4  | 3,5  | 3,2  |
| 60 | 280 | 17,4 | 13,1 | 9,9  | 7,9  | 6,4  | 5,1  | 3,8  | 2,7  | 1,8  | 1,6  |
| 60 | 290 | 16,2 | 11,5 | 8,3  | 6,4  | 5,0  | 3,8  | 2,5  | 1,4  | 0,6  | 0,5  |
| 60 | 300 | 15,0 | 10,4 | 7,3  | 5,5  | 4,3  | 3,2  | 2,0  | 0,8  | 0,1  | 0,1  |
| 60 | 310 | 14,2 | 9,8  | 7,1  | 5,6  | 4,5  | 3,4  | 2,2  | 1,0  | 0,4  | 0,6  |
| 60 | 320 | 13,9 | 10,0 | 7,7  | 6,4  | 5,5  | 4,5  | 3,3  | 2,2  | 1,7  | 2,2  |
| 60 | 330 | 14,0 | 10,7 | 8,9  | 7,9  | 7,2  | 6,2  | 5,1  | 4,0  | 3,7  | 4,6  |
| 60 | 340 | 14,3 | 11,6 | 10,3 | 9,6  | 9,0  | 8,2  | 7,1  | 6,2  | 6,1  | 7,2  |
| 60 | 350 | 14,6 | 12,5 | 11,7 | 11,2 | 10,7 | 10,0 | 9,0  | 8,3  | 8,4  | 9,7  |
| 60 | 360 | 14,5 | 13,1 | 12,5 | 12,3 | 11,9 | 11,2 | 10,4 | 9,8  | 10,1 | 11,4 |
| 70 | 0   | 13,5 | 13,7 | 14,0 | 14,0 | 13,6 | 12,7 | 11,8 | 11,2 | 11,5 | 12,7 |
| 70 | 10  | 13,4 | 13,8 | 14,3 | 14,3 | 14,0 | 13,1 | 12,3 | 11,8 | 12,0 | 13,1 |
| 70 | 20  | 12,9 | 13,4 | 13,9 | 14,1 | 13,7 | 12,8 | 12,0 | 11,5 | 11,6 | 12,4 |
| 70 | 30  | 12,0 | 12,7 | 13,2 | 13,4 | 13,0 | 12,1 | 11,3 | 10,6 | 10,7 | 11,2 |
| 70 | 40  | 11,1 | 11,8 | 12,5 | 12,5 | 12,2 | 11,2 | 10,3 | 9,6  | 9,4  | 9,7  |
| 70 | 50  | 10,5 | 11,3 | 11,9 | 12,0 | 11,6 | 10,5 | 9,5  | 8,7  | 8,4  | 8,4  |
| 70 | 60  | 10,4 | 11,2 | 11,8 | 11,9 | 11,4 | 10,3 | 9,1  | 8,2  | 7,7  | 7,6  |
| 70 | 70  | 10,8 | 11,7 | 12,3 | 12,3 | 11,7 | 10,5 | 9,3  | 8,3  | 7,7  | 7,5  |
| 70 | 80  | 11,6 | 12,5 | 13,1 | 13,1 | 12,5 | 11,3 | 9,9  | 8,9  | 8,2  | 7,9  |
| 70 | 90  | 12,6 | 13,6 | 14,2 | 14,2 | 13,5 | 12,3 | 10,9 | 9,8  | 9,1  | 8,7  |
| 70 | 100 | 13,6 | 14,6 | 15,2 | 15,2 | 14,6 | 13,3 | 11,9 | 10,8 | 10,0 | 9,6  |
| 70 | 110 | 14,3 | 15,2 | 15,9 | 15,9 | 15,3 | 14,0 | 12,7 | 11,5 | 10,7 | 10,3 |
| 70 | 120 | 14,4 | 15,4 | 16,1 | 16,1 | 15,5 | 14,3 | 12,9 | 11,8 | 11,0 | 10,6 |
| 70 | 130 | 14,1 | 15,0 | 15,7 | 15,7 | 15,1 | 13,9 | 12,6 | 11,4 | 10,7 | 10,3 |
| 70 | 140 | 13,2 | 14,2 | 14,8 | 14,8 | 14,2 | 13,0 | 11,7 | 10,6 | 9,8  | 9,4  |
| 70 | 150 | 12,1 | 13,0 | 13,6 | 13,5 | 13,0 | 11,8 | 10,5 | 9,4  | 8,6  | 8,2  |
| 70 | 160 | 11,1 | 11,8 | 12,3 | 12,3 | 11,7 | 10,5 | 9,2  | 8,1  | 7,4  | 7,0  |
| 70 | 170 | 10,3 | 11,0 | 11,4 | 11,3 | 10,7 | 9,5  | 8,2  | 7,1  | 6,3  | 5,9  |
| 70 | 180 | 10,2 | 10,7 | 11,0 | 10,8 | 10,2 | 9,0  | 7,6  | 6,5  | 5,7  | 5,2  |

|     |     |      |      |      |      |      |      |      |      |      |      |
|-----|-----|------|------|------|------|------|------|------|------|------|------|
| 240 | 0   | 33,7 | 33,0 | 31,4 | 29,2 | 27,2 | 25,9 | 25,6 | 25,6 | 25,8 | 26,1 |
| 240 | 10  | 33,3 | 32,6 | 31,0 | 28,9 | 27,0 | 25,8 | 25,5 | 25,5 | 25,7 | 25,8 |
| 240 | 20  | 32,2 | 31,5 | 30,0 | 28,0 | 26,1 | 25,0 | 24,7 | 24,7 | 24,8 | 24,8 |
| 240 | 30  | 30,6 | 30,0 | 28,5 | 26,6 | 24,8 | 23,8 | 23,5 | 23,4 | 23,3 | 23,2 |
| 240 | 40  | 28,9 | 28,3 | 26,9 | 25,0 | 23,4 | 22,3 | 22,0 | 21,8 | 21,6 | 21,4 |
| 240 | 50  | 27,3 | 26,8 | 25,5 | 23,7 | 22,1 | 21,1 | 20,7 | 20,3 | 20,0 | 19,7 |
| 240 | 60  | 26,3 | 25,9 | 24,6 | 22,9 | 21,3 | 20,3 | 19,7 | 19,2 | 18,8 | 18,5 |
| 240 | 70  | 26,1 | 25,6 | 24,4 | 22,7 | 21,2 | 20,1 | 19,4 | 18,8 | 18,3 | 18,0 |
| 240 | 80  | 26,5 | 26,0 | 24,8 | 23,2 | 21,6 | 20,4 | 19,6 | 19,0 | 18,5 | 18,1 |
| 240 | 90  | 27,3 | 26,9 | 25,7 | 24,0 | 22,4 | 21,2 | 20,3 | 19,6 | 19,1 | 18,8 |
| 240 | 100 | 28,4 | 27,9 | 26,7 | 25,0 | 23,3 | 22,0 | 21,1 | 20,3 | 19,8 | 19,7 |
| 240 | 110 | 29,2 | 28,8 | 27,6 | 25,8 | 24,0 | 22,6 | 21,6 | 20,9 | 20,5 | 20,4 |
| 240 | 120 | 29,7 | 29,2 | 28,0 | 26,1 | 24,2 | 22,7 | 21,8 | 21,1 | 20,8 | 20,7 |
| 240 | 130 | 29,5 | 29,0 | 27,7 | 25,8 | 23,9 | 22,3 | 21,3 | 20,7 | 20,5 | 20,5 |
| 240 | 140 | 28,8 | 28,3 | 26,9 | 24,9 | 22,9 | 21,3 | 20,4 | 19,8 | 19,7 | 19,8 |
| 240 | 150 | 27,7 | 27,1 | 25,7 | 23,7 | 21,5 | 19,9 | 19,0 | 18,6 | 18,6 | 18,8 |
| 240 | 160 | 26,4 | 25,9 | 24,4 | 22,3 | 20,1 | 18,5 | 17,7 | 17,3 | 17,4 | 17,6 |
| 240 | 170 | 25,5 | 24,9 | 23,4 | 21,2 | 19,0 | 17,4 | 16,6 | 16,4 | 16,5 | 16,8 |
| 240 | 180 | 25,1 | 24,5 | 23,0 | 20,8 | 18,5 | 16,9 | 16,2 | 16,0 | 16,2 | 16,6 |
| 240 | 190 | 25,5 | 24,9 | 23,3 | 21,0 | 18,8 | 17,2 | 16,5 | 16,4 | 16,6 | 17,0 |
| 240 | 200 | 26,5 | 25,9 | 24,3 | 22,0 | 19,7 | 18,1 | 17,4 | 17,3 | 17,6 | 18,0 |
| 240 | 210 | 27,8 | 27,1 | 25,5 | 23,3 | 21,0 | 19,4 | 18,7 | 18,6 | 18,8 | 19,2 |
| 240 | 220 | 29,0 | 28,4 | 26,8 | 24,5 | 22,2 | 20,6 | 19,9 | 19,8 | 20,0 | 20,4 |
| 240 | 230 | 29,9 | 29,3 | 27,7 | 25,4 | 23,1 | 21,5 | 20,8 | 20,7 | 20,8 | 21,2 |
| 240 | 240 | 30,3 | 29,7 | 28,1 | 25,8 | 23,5 | 21,8 | 21,1 | 21,0 | 21,1 | 21,4 |
| 240 | 250 | 30,1 | 29,5 | 27,9 | 25,6 | 23,3 | 21,6 | 20,8 | 20,6 | 20,8 | 21,1 |
| 240 | 260 | 29,4 | 28,8 | 27,3 | 25,0 | 22,6 | 20,9 | 20,1 | 19,9 | 20,0 | 20,3 |
| 240 | 270 | 28,5 | 27,9 | 26,4 | 24,1 | 21,7 | 20,0 | 19,2 | 18,9 | 19,0 | 19,3 |
| 240 | 280 | 27,6 | 27,0 | 25,5 | 23,2 | 20,9 | 19,2 | 18,3 | 18,1 | 18,2 | 18,4 |
| 240 | 290 | 27,0 | 26,5 | 25,0 | 22,8 | 20,4 | 18,7 | 17,9 | 17,6 | 17,7 | 18,0 |
| 240 | 300 | 27,1 | 26,6 | 25,1 | 22,9 | 20,6 | 18,9 | 18,1 | 17,9 | 18,0 | 18,3 |
| 240 | 310 | 27,9 | 27,4 | 25,9 | 23,7 | 21,4 | 19,7 | 19,0 | 18,8 | 18,9 | 19,3 |
| 240 | 320 | 29,3 | 28,7 | 27,2 | 24,9 | 22,7 | 21,1 | 20,5 | 20,3 | 20,5 | 20,8 |
| 240 | 330 | 30,8 | 30,2 | 28,6 | 26,5 | 24,3 | 22,7 | 22,1 | 22,1 | 22,3 | 22,6 |
| 240 | 340 | 32,3 | 31,6 | 30,0 | 27,9 | 25,7 | 24,3 | 23,7 | 23,7 | 24,0 | 24,3 |
| 240 | 350 | 33,3 | 32,6 | 31,0 | 28,9 | 26,8 | 25,4 | 25,0 | 25,0 | 25,2 | 25,6 |
| 240 | 360 | 33,7 | 33,0 | 31,4 | 29,2 | 27,2 | 25,9 | 25,6 | 25,6 | 25,8 | 26,1 |
| 250 | 0   | 31,7 | 30,6 | 28,8 | 26,8 | 25,4 | 24,7 | 24,7 | 25,0 | 25,2 | 25,3 |
| 250 | 10  | 31,1 | 30,0 | 28,3 | 26,5 | 25,2 | 24,6 | 24,7 | 24,9 | 25,0 | 24,9 |
| 250 | 20  | 29,9 | 28,9 | 27,2 | 25,5 | 24,4 | 23,9 | 24,0 | 24,0 | 24,0 | 23,7 |
| 250 | 30  | 28,1 | 27,2 | 25,7 | 24,1 | 23,1 | 22,7 | 22,7 | 22,6 | 22,3 | 21,9 |
| 250 | 40  | 26,3 | 25,4 | 24,0 | 22,6 | 21,7 | 21,3 | 21,2 | 20,9 | 20,4 | 19,9 |
| 250 | 50  | 24,7 | 23,9 | 22,6 | 21,3 | 20,5 | 20,1 | 19,7 | 19,2 | 18,5 | 18,0 |
| 250 | 60  | 23,7 | 23,0 | 21,7 | 20,5 | 19,7 | 19,2 | 18,7 | 18,0 | 17,2 | 16,6 |
| 250 | 70  | 23,4 | 22,8 | 21,6 | 20,5 | 19,5 | 18,9 | 18,2 | 17,3 | 16,5 | 16,0 |
| 250 | 80  | 23,9 | 23,2 | 22,1 | 20,9 | 19,9 | 19,1 | 18,2 | 17,3 | 16,5 | 16,1 |
| 250 | 90  | 24,8 | 24,1 | 23,0 | 21,8 | 20,6 | 19,7 | 18,7 | 17,7 | 17,1 | 16,7 |
| 250 | 100 | 25,9 | 25,2 | 24,1 | 22,7 | 21,4 | 20,3 | 19,3 | 18,4 | 17,8 | 17,6 |
| 250 | 110 | 26,8 | 26,1 | 24,9 | 23,4 | 22,0 | 20,8 | 19,7 | 18,9 | 18,5 | 18,3 |
| 250 | 120 | 27,3 | 26,6 | 25,2 | 23,6 | 22,1 | 20,8 | 19,8 | 19,1 | 18,7 | 18,7 |
| 250 | 130 | 27,2 | 26,4 | 25,0 | 23,3 | 21,6 | 20,3 | 19,3 | 18,8 | 18,5 | 18,6 |
| 250 | 140 | 26,6 | 25,8 | 24,2 | 22,4 | 20,6 | 19,3 | 18,4 | 18,0 | 17,8 | 18,0 |
| 250 | 150 | 25,6 | 24,7 | 23,1 | 21,1 | 19,3 | 18,0 | 17,2 | 16,9 | 16,9 | 17,1 |
| 250 | 160 | 24,6 | 23,6 | 21,9 | 19,8 | 18,0 | 16,7 | 16,0 | 15,8 | 15,9 | 16,2 |
| 250 | 170 | 23,9 | 22,8 | 21,0 | 18,9 | 17,0 | 15,7 | 15,1 | 15,0 | 15,2 | 15,6 |
| 250 | 180 | 23,7 | 22,6 | 20,8 | 18,6 | 16,7 | 15,5 | 15,0 | 14,9 | 15,2 | 15,6 |

|    |     |      |      |      |      |      |      |      |      |      |      |     |     |      |      |      |      |      |      |      |      |      |      |
|----|-----|------|------|------|------|------|------|------|------|------|------|-----|-----|------|------|------|------|------|------|------|------|------|------|
| 70 | 190 | 10,6 | 11,0 | 11,2 | 11,0 | 10,3 | 9,0  | 7,6  | 6,4  | 5,6  | 5,1  | 250 | 190 | 24,3 | 23,2 | 21,3 | 19,1 | 17,1 | 16,0 | 15,5 | 15,5 | 15,9 | 16,3 |
| 70 | 200 | 11,6 | 11,8 | 11,8 | 11,5 | 10,8 | 9,5  | 8,0  | 6,8  | 5,9  | 5,4  | 250 | 200 | 25,4 | 24,3 | 22,3 | 20,1 | 18,2 | 17,0 | 16,6 | 16,7 | 17,1 | 17,5 |
| 70 | 210 | 12,9 | 12,8 | 12,7 | 12,3 | 11,5 | 10,1 | 8,6  | 7,4  | 6,4  | 5,9  | 250 | 210 | 26,8 | 25,7 | 23,8 | 21,5 | 19,6 | 18,4 | 18,1 | 18,2 | 18,5 | 18,9 |
| 70 | 220 | 14,2 | 13,8 | 13,5 | 12,9 | 12,1 | 10,7 | 9,2  | 7,9  | 6,9  | 6,4  | 250 | 220 | 28,1 | 27,0 | 25,1 | 22,9 | 20,9 | 19,8 | 19,4 | 19,5 | 19,8 | 20,2 |
| 70 | 230 | 15,2 | 14,5 | 13,9 | 13,2 | 12,3 | 10,9 | 9,4  | 8,0  | 7,1  | 6,6  | 250 | 230 | 29,1 | 28,0 | 26,1 | 23,9 | 21,9 | 20,7 | 20,3 | 20,4 | 20,7 | 21,0 |
| 70 | 240 | 15,7 | 14,6 | 13,8 | 13,0 | 12,0 | 10,5 | 9,0  | 7,7  | 6,7  | 6,3  | 250 | 240 | 29,6 | 28,5 | 26,6 | 24,3 | 22,3 | 21,1 | 20,7 | 20,8 | 21,0 | 21,3 |
| 70 | 250 | 15,6 | 14,1 | 13,1 | 12,1 | 11,1 | 9,6  | 8,1  | 6,7  | 5,8  | 5,4  | 250 | 250 | 29,4 | 28,3 | 26,4 | 24,2 | 22,1 | 20,9 | 20,4 | 20,5 | 20,7 | 21,0 |
| 70 | 260 | 14,8 | 13,0 | 11,8 | 10,7 | 9,7  | 8,2  | 6,7  | 5,4  | 4,5  | 4,1  | 250 | 260 | 28,7 | 27,7 | 25,8 | 23,5 | 21,5 | 20,2 | 19,7 | 19,7 | 19,9 | 20,2 |
| 70 | 270 | 13,6 | 11,5 | 10,1 | 9,1  | 8,0  | 6,5  | 5,0  | 3,8  | 2,9  | 2,7  | 250 | 270 | 27,8 | 26,8 | 24,9 | 22,6 | 20,6 | 19,2 | 18,7 | 18,7 | 18,9 | 19,2 |
| 70 | 280 | 12,2 | 9,9  | 8,5  | 7,5  | 6,5  | 5,0  | 3,6  | 2,3  | 1,5  | 1,4  | 250 | 280 | 26,9 | 25,9 | 24,0 | 21,7 | 19,7 | 18,3 | 17,8 | 17,7 | 17,9 | 18,2 |
| 70 | 290 | 10,9 | 8,6  | 7,3  | 6,4  | 5,4  | 4,0  | 2,5  | 1,3  | 0,5  | 0,7  | 250 | 290 | 26,3 | 25,3 | 23,4 | 21,2 | 19,1 | 17,8 | 17,3 | 17,2 | 17,4 | 17,8 |
| 70 | 300 | 9,9  | 7,9  | 6,7  | 6,0  | 5,0  | 3,7  | 2,3  | 1,1  | 0,4  | 0,7  | 250 | 300 | 26,3 | 25,3 | 23,4 | 21,2 | 19,2 | 17,9 | 17,4 | 17,4 | 17,6 | 18,0 |
| 70 | 310 | 9,7  | 8,0  | 7,0  | 6,4  | 5,5  | 4,2  | 2,9  | 1,7  | 1,2  | 1,7  | 250 | 310 | 26,9 | 25,9 | 24,0 | 21,8 | 19,9 | 18,6 | 18,2 | 18,2 | 18,5 | 18,9 |
| 70 | 320 | 10,1 | 8,7  | 8,1  | 7,6  | 6,9  | 5,6  | 4,3  | 3,2  | 2,9  | 3,7  | 250 | 320 | 28,1 | 27,0 | 25,1 | 22,9 | 21,1 | 19,9 | 19,6 | 19,7 | 20,0 | 20,4 |
| 70 | 330 | 11,0 | 10,0 | 9,7  | 9,3  | 8,7  | 7,5  | 6,3  | 5,3  | 5,2  | 6,3  | 250 | 330 | 29,4 | 28,3 | 26,4 | 24,3 | 22,5 | 21,5 | 21,2 | 21,4 | 21,7 | 22,1 |
| 70 | 340 | 12,1 | 11,6 | 11,4 | 11,2 | 10,7 | 9,6  | 8,5  | 7,7  | 7,8  | 9,1  | 250 | 340 | 30,7 | 29,5 | 27,7 | 25,6 | 23,9 | 23,0 | 22,8 | 23,1 | 23,4 | 23,7 |
| 70 | 350 | 13,0 | 12,9 | 13,0 | 12,9 | 12,4 | 11,4 | 10,4 | 9,8  | 10,1 | 11,3 | 250 | 350 | 31,5 | 30,4 | 28,5 | 26,5 | 24,9 | 24,1 | 24,1 | 24,4 | 24,6 | 24,9 |
| 70 | 360 | 13,5 | 13,7 | 14,0 | 14,0 | 13,6 | 12,7 | 11,8 | 11,2 | 11,5 | 12,7 | 250 | 360 | 31,7 | 30,6 | 28,8 | 26,8 | 25,4 | 24,7 | 24,7 | 25,0 | 25,2 | 25,3 |
| 80 | 0   | 16,5 | 17,4 | 17,8 | 17,7 | 17,0 | 15,9 | 14,9 | 14,4 | 14,6 | 15,5 | 260 | 0   | 27,3 | 25,9 | 24,3 | 22,9 | 22,2 | 22,2 | 22,5 | 22,8 | 22,8 | 22,6 |
| 80 | 10  | 16,5 | 17,5 | 18,1 | 18,0 | 17,4 | 16,2 | 15,2 | 14,7 | 14,9 | 15,5 | 260 | 10  | 26,6 | 25,3 | 23,8 | 22,5 | 22,1 | 22,3 | 22,7 | 22,7 | 22,5 | 22,1 |
| 80 | 20  | 16,0 | 17,1 | 17,7 | 17,6 | 17,0 | 15,8 | 14,8 | 14,2 | 14,2 | 14,6 | 260 | 20  | 25,2 | 24,1 | 22,7 | 21,7 | 21,5 | 21,8 | 22,0 | 21,9 | 21,3 | 20,7 |
| 80 | 30  | 15,1 | 16,3 | 16,9 | 16,8 | 16,1 | 14,9 | 13,9 | 13,2 | 13,1 | 13,2 | 260 | 30  | 23,5 | 22,4 | 21,2 | 20,4 | 20,4 | 20,7 | 20,8 | 20,3 | 19,5 | 18,7 |
| 80 | 40  | 14,3 | 15,4 | 16,0 | 15,9 | 15,2 | 13,9 | 12,8 | 12,0 | 11,7 | 11,6 | 260 | 40  | 21,6 | 20,7 | 19,7 | 19,1 | 19,3 | 19,4 | 19,2 | 18,4 | 17,3 | 16,4 |
| 80 | 50  | 13,7 | 14,8 | 15,4 | 15,2 | 14,4 | 13,1 | 11,9 | 11,0 | 10,5 | 10,3 | 260 | 50  | 20,1 | 19,3 | 18,4 | 18,0 | 18,2 | 18,2 | 17,6 | 16,5 | 15,2 | 14,3 |
| 80 | 60  | 13,6 | 14,7 | 15,2 | 15,0 | 14,1 | 12,7 | 11,4 | 10,4 | 9,9  | 9,5  | 260 | 60  | 19,2 | 18,5 | 17,7 | 17,5 | 17,5 | 17,2 | 16,3 | 15,0 | 13,7 | 12,9 |
| 80 | 70  | 13,9 | 15,1 | 15,6 | 15,3 | 14,4 | 12,9 | 11,5 | 10,4 | 9,8  | 9,4  | 260 | 70  | 19,0 | 18,4 | 17,7 | 17,5 | 17,3 | 16,7 | 15,6 | 14,2 | 12,9 | 12,2 |
| 80 | 80  | 14,8 | 15,9 | 16,4 | 16,1 | 15,1 | 13,6 | 12,1 | 11,0 | 10,3 | 9,9  | 260 | 80  | 19,6 | 19,0 | 18,4 | 18,0 | 17,5 | 16,7 | 15,4 | 14,0 | 12,9 | 12,3 |
| 80 | 90  | 15,8 | 16,9 | 17,4 | 17,1 | 16,1 | 14,6 | 13,1 | 11,9 | 11,2 | 10,8 | 260 | 90  | 20,6 | 20,0 | 19,4 | 18,8 | 18,1 | 17,1 | 15,7 | 14,3 | 13,4 | 13,0 |
| 80 | 100 | 16,7 | 17,9 | 18,4 | 18,1 | 17,2 | 15,6 | 14,1 | 13,0 | 12,2 | 11,8 | 260 | 100 | 21,8 | 21,1 | 20,4 | 19,6 | 18,7 | 17,5 | 16,1 | 14,9 | 14,1 | 13,9 |
| 80 | 110 | 17,4 | 18,6 | 19,1 | 18,8 | 17,9 | 16,3 | 14,8 | 13,7 | 13,0 | 12,5 | 260 | 110 | 22,7 | 22,1 | 21,1 | 20,1 | 19,0 | 17,8 | 16,4 | 15,4 | 14,8 | 14,7 |
| 80 | 120 | 17,5 | 18,7 | 19,2 | 19,0 | 18,1 | 16,5 | 15,1 | 13,9 | 13,2 | 12,8 | 260 | 120 | 23,3 | 22,5 | 21,4 | 20,2 | 19,0 | 17,7 | 16,4 | 15,6 | 15,2 | 15,2 |
| 80 | 130 | 17,0 | 18,2 | 18,7 | 18,5 | 17,6 | 16,1 | 14,7 | 13,6 | 12,9 | 12,5 | 260 | 130 | 23,2 | 22,3 | 21,1 | 19,7 | 18,3 | 17,1 | 16,0 | 15,3 | 15,1 | 15,2 |
| 80 | 140 | 16,0 | 17,2 | 17,7 | 17,5 | 16,6 | 15,1 | 13,7 | 12,7 | 12,0 | 11,5 | 260 | 140 | 22,7 | 21,7 | 20,3 | 18,7 | 17,2 | 16,0 | 15,1 | 14,6 | 14,5 | 14,7 |
| 80 | 150 | 14,7 | 15,9 | 16,4 | 16,2 | 15,3 | 13,8 | 12,4 | 11,4 | 10,7 | 10,2 | 260 | 150 | 21,8 | 20,7 | 19,1 | 17,4 | 15,9 | 14,8 | 14,0 | 13,6 | 13,6 | 13,9 |
| 80 | 160 | 13,4 | 14,5 | 15,0 | 14,8 | 13,9 | 12,4 | 11,0 | 10,0 | 9,3  | 8,8  | 260 | 160 | 20,9 | 19,6 | 18,0 | 16,2 | 14,6 | 13,6 | 12,9 | 12,7 | 12,9 | 13,2 |
| 80 | 170 | 12,4 | 13,5 | 13,9 | 13,7 | 12,8 | 11,3 | 9,9  | 8,8  | 8,1  | 7,6  | 260 | 170 | 20,3 | 18,9 | 17,2 | 15,3 | 13,8 | 12,8 | 12,3 | 12,2 | 12,4 | 12,9 |
| 80 | 180 | 12,0 | 12,9 | 13,3 | 13,1 | 12,2 | 10,6 | 9,2  | 8,0  | 7,3  | 6,8  | 260 | 180 | 20,3 | 18,9 | 17,0 | 15,1 | 13,6 | 12,7 | 12,3 | 12,3 | 12,6 | 13,1 |
| 80 | 190 | 12,2 | 13,0 | 13,3 | 13,1 | 12,1 | 10,5 | 9,0  | 7,8  | 7,0  | 6,5  | 260 | 190 | 20,9 | 19,4 | 17,5 | 15,6 | 14,1 | 13,3 | 13,0 | 13,1 | 13,5 | 13,9 |
| 80 | 200 | 12,9 | 13,6 | 13,8 | 13,5 | 12,5 | 10,9 | 9,3  | 8,1  | 7,2  | 6,7  | 260 | 200 | 22,1 | 20,6 | 18,7 | 16,7 | 15,2 | 14,5 | 14,3 | 14,4 | 14,8 | 15,2 |
| 80 | 210 | 13,9 | 14,4 | 14,6 | 14,2 | 13,1 | 11,5 | 9,9  | 8,6  | 7,7  | 7,2  | 260 | 210 | 23,6 | 22,1 | 20,1 | 18,2 | 16,7 | 15,9 | 15,8 | 16,0 | 16,3 | 16,7 |
| 80 | 220 | 15,0 | 15,3 | 15,3 | 14,8 | 13,7 | 12,0 | 10,4 | 9,1  | 8,2  | 7,7  | 260 | 220 | 25,0 | 23,5 | 21,6 | 19,6 | 18,1 | 17,3 | 17,2 | 17,4 | 17,7 | 18,1 |
| 80 | 230 | 15,7 | 15,8 | 15,6 | 15,0 | 13,9 | 12,3 | 10,6 | 9,3  | 8,4  | 8,0  | 260 | 230 | 26,0 | 24,6 | 22,6 | 20,6 | 19,1 | 18,3 | 18,1 | 18,3 | 18,7 | 19,0 |
| 80 | 240 | 15,9 | 15,7 | 15,4 | 14,8 | 13,6 | 12,0 | 10,3 | 9,0  | 8,2  | 7,8  | 260 | 240 | 26,5 | 25,1 | 23,1 | 21,1 | 19,6 | 18,8 | 18,5 | 18,7 | 19,0 | 19,4 |
| 80 | 250 | 15,4 | 15,1 | 14,7 | 14,0 | 12,8 | 11,1 | 9,5  | 8,2  | 7,4  | 7,1  | 260 | 250 | 26,4 | 24,9 | 23,0 | 21,0 | 19,4 | 18,6 | 18,3 | 18,5 | 18,7 | 19,1 |
| 80 | 260 | 14,5 | 13,9 | 13,4 | 12,7 | 11,5 | 9,9  | 8,3  | 7,0  | 6,3  | 6,0  | 260 | 260 | 25,8 | 24,3 | 22,3 | 20,3 | 18,7 | 17,8 | 17,6 | 17,7 | 17,9 | 18,3 |
| 80 | 270 | 13,1 | 12,4 | 12,0 | 11,2 | 10,0 | 8,4  | 6,8  | 5,6  | 4,9  | 4,8  | 260 | 270 | 24,8 | 23,4 | 21,4 | 19,4 | 17,8 | 16,8 | 16,5 | 16,6 | 16,8 | 17,2 |
| 80 | 280 | 11,8 | 11,1 | 10,6 | 9,9  | 8,8  | 7,1  | 5,6  | 4,4  | 3,8  | 3,8  | 260 | 280 | 23,8 | 22,4 | 20,5 | 18,4 | 16,8 | 15,9 | 15,5 | 15,6 | 15,9 | 16,2 |
| 80 | 290 | 10,7 | 10,1 | 9,7  | 9,1  | 8,0  | 6,4  | 4,8  | 3,7  | 3,1  | 3,4  | 260 | 290 | 23,2 | 21,8 | 19,8 | 17,8 | 16,2 | 15,3 | 14,9 | 15,0 | 15,3 | 15,7 |
| 80 | 300 | 10,2 | 9,8  | 9,5  | 9,0  | 7,9  | 6,3  | 4,8  | 3,8  | 3,3  | 3,8  | 260 | 300 | 23,0 | 21,6 | 19,7 | 17,7 | 16,1 | 15,2 | 15,0 | 15,1 | 15,4 | 15,8 |
| 80 | 310 | 10,5 | 10,3 | 10,2 | 9,8  | 8,7  | 7,2  | 5,7  | 4,7  | 4,5  | 5,1  | 260 | 310 | 23,5 | 22,1 | 20,1 | 18,2 | 16,7 | 15,9 | 15,7 | 16,0 | 16,3 | 16,7 |
| 80 | 320 | 11,5 | 11,6 | 11,6 | 11,2 | 10,2 | 8,7  | 7,4  | 6,5  | 6,4  | 7,3  | 260 | 320 | 24,4 | 22,9 | 21,0 | 19,1 | 17,8 | 17,1 | 17,1 | 17,4 | 17,7 | 18,1 |
| 80 | 330 | 12,9 | 13,2 | 13,4 | 13,1 | 12,2 | 10,8 | 9,5  | 8,8  | 8,9  | 10,0 | 260 | 330 | 25,5 | 24,0 | 22,2 | 20,4 | 19,1 | 18,7 | 18,7 | 19,1 | 19,4 | 19,7 |
| 80 | 340 | 14,4 | 15,0 | 15,3 | 15,1 | 14,3 | 13,0 | 11,8 | 11,2 | 11,4 | 12,5 | 260 | 340 | 26,6 | 25,1 | 23,3 | 21,6 | 20,5 | 20,2 | 20,4 | 20,7 | 21,1 | 21,3 |
| 80 | 350 | 15,7 | 16,5 | 16,9 | 16,7 | 16,0 | 14,8 | 13,7 | 13,2 | 13,4 | 14,5 | 260 | 350 | 27,2 | 25,8 | 24,0 | 22,5 | 21,6 | 21,4 | 21,7 | 22,1 | 22,3 | 22,3 |
| 80 | 360 | 16,5 | 17,4 | 17,8 | 17,7 | 17,0 | 15,9 | 14,9 | 14,4 | 14,6 | 15,5 | 260 | 360 | 27,3 | 25,9 | 24,3 | 22,9 | 22,2 | 22,2 | 22,5 | 22,8 | 22,8 | 22,6 |
| 90 | 0   | 21,7 | 22,6 | 22,9 | 22,5 | 21,4 | 20,0 | 19,1 | 18,6 | 18,7 | 19,1 | 270 | 0   | 21,7 | 20,4 | 19,2 | 18,8 | 19,1 | 19,7 | 20,2 | 20,1 | 19,6 | 19,0 |

|     |     |      |      |      |      |      |      |      |      |      |      |
|-----|-----|------|------|------|------|------|------|------|------|------|------|
| 90  | 10  | 21,7 | 22,7 | 23,0 | 22,6 | 21,5 | 20,2 | 19,2 | 18,7 | 18,7 | 18,8 |
| 90  | 20  | 21,1 | 22,2 | 22,5 | 22,1 | 21,0 | 19,7 | 18,6 | 18,1 | 17,9 | 17,8 |
| 90  | 30  | 20,2 | 21,3 | 21,6 | 21,2 | 20,0 | 18,7 | 17,6 | 16,9 | 16,5 | 16,3 |
| 90  | 40  | 19,3 | 20,3 | 20,6 | 20,1 | 18,9 | 17,5 | 16,3 | 15,5 | 15,1 | 14,7 |
| 90  | 50  | 18,6 | 19,6 | 19,8 | 19,3 | 18,0 | 16,5 | 15,2 | 14,4 | 13,8 | 13,4 |
| 90  | 60  | 18,3 | 19,3 | 19,5 | 18,9 | 17,6 | 16,0 | 14,6 | 13,7 | 13,0 | 12,6 |
| 90  | 70  | 18,6 | 19,6 | 19,7 | 19,1 | 17,7 | 16,0 | 14,6 | 13,6 | 12,9 | 12,5 |
| 90  | 80  | 19,4 | 20,3 | 20,4 | 19,8 | 18,4 | 16,6 | 15,2 | 14,2 | 13,5 | 13,0 |
| 90  | 90  | 20,4 | 21,3 | 21,5 | 20,8 | 19,4 | 17,6 | 16,2 | 15,1 | 14,5 | 14,0 |
| 90  | 100 | 21,3 | 22,3 | 22,4 | 21,8 | 20,4 | 18,7 | 17,2 | 16,2 | 15,5 | 15,0 |
| 90  | 110 | 22,0 | 23,0 | 23,1 | 22,5 | 21,1 | 19,4 | 17,9 | 16,9 | 16,3 | 15,8 |
| 90  | 120 | 22,1 | 23,1 | 23,3 | 22,7 | 21,3 | 19,6 | 18,2 | 17,2 | 16,6 | 16,1 |
| 90  | 130 | 21,6 | 22,6 | 22,8 | 22,2 | 20,9 | 19,2 | 17,8 | 16,8 | 16,2 | 15,7 |
| 90  | 140 | 20,5 | 21,5 | 21,7 | 21,2 | 19,8 | 18,2 | 16,8 | 15,8 | 15,2 | 14,8 |
| 90  | 150 | 19,1 | 20,1 | 20,3 | 19,8 | 18,5 | 16,8 | 15,4 | 14,5 | 13,9 | 13,4 |
| 90  | 160 | 17,7 | 18,7 | 18,9 | 18,3 | 17,0 | 15,4 | 14,0 | 13,1 | 12,4 | 11,9 |
| 90  | 170 | 16,5 | 17,5 | 17,7 | 17,2 | 15,8 | 14,2 | 12,8 | 11,8 | 11,1 | 10,6 |
| 90  | 180 | 15,9 | 16,8 | 17,0 | 16,5 | 15,1 | 13,4 | 12,0 | 11,0 | 10,3 | 9,7  |
| 90  | 190 | 15,9 | 16,8 | 17,0 | 16,4 | 15,0 | 13,3 | 11,8 | 10,7 | 10,0 | 9,4  |
| 90  | 200 | 16,5 | 17,3 | 17,4 | 16,8 | 15,4 | 13,6 | 12,1 | 11,0 | 10,2 | 9,6  |
| 90  | 210 | 17,4 | 18,1 | 18,1 | 17,5 | 16,0 | 14,3 | 12,7 | 11,5 | 10,8 | 10,2 |
| 90  | 220 | 18,3 | 18,8 | 18,8 | 18,1 | 16,6 | 14,9 | 13,2 | 12,1 | 11,3 | 10,8 |
| 90  | 230 | 18,9 | 19,3 | 19,1 | 18,4 | 16,9 | 15,2 | 13,5 | 12,4 | 11,6 | 11,2 |
| 90  | 240 | 18,9 | 19,2 | 19,0 | 18,2 | 16,7 | 15,0 | 13,3 | 12,2 | 11,5 | 11,1 |
| 90  | 250 | 18,4 | 18,5 | 18,3 | 17,5 | 16,0 | 14,2 | 12,6 | 11,5 | 10,8 | 10,5 |
| 90  | 260 | 17,4 | 17,4 | 17,1 | 16,3 | 14,8 | 13,1 | 11,5 | 10,4 | 9,8  | 9,6  |
| 90  | 270 | 16,1 | 16,1 | 15,9 | 15,0 | 13,5 | 11,8 | 10,2 | 9,2  | 8,7  | 8,6  |
| 90  | 280 | 14,9 | 15,0 | 14,7 | 13,9 | 12,4 | 10,7 | 9,2  | 8,2  | 7,8  | 7,9  |
| 90  | 290 | 14,1 | 14,3 | 14,1 | 13,3 | 11,8 | 10,1 | 8,7  | 7,7  | 7,4  | 7,7  |
| 90  | 300 | 14,0 | 14,3 | 14,2 | 13,4 | 12,0 | 10,3 | 8,9  | 8,0  | 7,8  | 8,3  |
| 90  | 310 | 14,7 | 15,1 | 15,1 | 14,4 | 13,0 | 11,3 | 10,0 | 9,2  | 9,2  | 9,8  |
| 90  | 320 | 16,1 | 16,6 | 16,6 | 16,0 | 14,7 | 13,1 | 11,8 | 11,2 | 11,2 | 12,0 |
| 90  | 330 | 17,8 | 18,5 | 18,6 | 18,0 | 16,7 | 15,2 | 14,0 | 13,5 | 13,7 | 14,5 |
| 90  | 340 | 19,6 | 20,4 | 20,5 | 20,0 | 18,8 | 17,4 | 16,3 | 15,8 | 16,0 | 16,8 |
| 90  | 350 | 21,0 | 21,8 | 22,0 | 21,6 | 20,4 | 19,1 | 18,0 | 17,6 | 17,8 | 18,4 |
| 90  | 360 | 21,7 | 22,6 | 22,9 | 22,5 | 21,4 | 20,0 | 19,1 | 18,6 | 18,7 | 19,1 |
| 100 | 0   | 27,3 | 28,0 | 27,9 | 27,0 | 25,5 | 24,1 | 23,2 | 22,8 | 22,7 | 22,7 |
| 100 | 10  | 27,2 | 27,9 | 27,9 | 27,0 | 25,5 | 24,2 | 23,2 | 22,7 | 22,5 | 22,3 |
| 100 | 20  | 26,5 | 27,3 | 27,2 | 26,3 | 24,8 | 23,5 | 22,5 | 21,9 | 21,5 | 21,2 |
| 100 | 30  | 25,5 | 26,2 | 26,1 | 25,2 | 23,7 | 22,3 | 21,2 | 20,6 | 20,1 | 19,7 |
| 100 | 40  | 24,4 | 25,1 | 24,9 | 24,0 | 22,4 | 20,9 | 19,8 | 19,0 | 18,5 | 18,0 |
| 100 | 50  | 23,5 | 24,2 | 23,9 | 23,0 | 21,3 | 19,7 | 18,6 | 17,7 | 17,1 | 16,6 |
| 100 | 60  | 23,0 | 23,7 | 23,4 | 22,4 | 20,7 | 19,0 | 17,8 | 16,9 | 16,2 | 15,7 |
| 100 | 70  | 23,2 | 23,8 | 23,5 | 22,4 | 20,6 | 18,9 | 17,7 | 16,8 | 16,1 | 15,6 |
| 100 | 80  | 23,8 | 24,4 | 24,1 | 23,0 | 21,2 | 19,4 | 18,2 | 17,3 | 16,6 | 16,1 |
| 100 | 90  | 24,8 | 25,4 | 25,1 | 24,0 | 22,2 | 20,4 | 19,1 | 18,2 | 17,6 | 17,1 |
| 100 | 100 | 25,8 | 26,4 | 26,1 | 25,0 | 23,2 | 21,4 | 20,1 | 19,3 | 18,6 | 18,2 |
| 100 | 110 | 26,4 | 27,0 | 26,8 | 25,8 | 23,9 | 22,1 | 20,9 | 20,0 | 19,4 | 19,0 |
| 100 | 120 | 26,5 | 27,2 | 27,0 | 25,9 | 24,1 | 22,4 | 21,1 | 20,3 | 19,7 | 19,3 |
| 100 | 130 | 26,0 | 26,7 | 26,5 | 25,5 | 23,7 | 22,0 | 20,8 | 20,0 | 19,4 | 18,9 |
| 100 | 140 | 25,0 | 25,6 | 25,5 | 24,5 | 22,8 | 21,1 | 19,8 | 19,0 | 18,5 | 18,0 |
| 100 | 150 | 23,6 | 24,2 | 24,1 | 23,1 | 21,4 | 19,7 | 18,5 | 17,7 | 17,1 | 16,6 |
| 100 | 160 | 22,1 | 22,8 | 22,6 | 21,7 | 20,0 | 18,3 | 17,1 | 16,3 | 15,7 | 15,1 |
| 100 | 170 | 20,9 | 21,6 | 21,5 | 20,5 | 18,8 | 17,1 | 15,9 | 15,0 | 14,4 | 13,8 |
| 100 | 180 | 20,3 | 20,9 | 20,8 | 19,8 | 18,1 | 16,4 | 15,1 | 14,2 | 13,6 | 13,0 |
| 100 | 190 | 20,3 | 20,9 | 20,8 | 19,8 | 18,0 | 16,3 | 15,0 | 14,1 | 13,3 | 12,8 |

|     |     |      |      |      |      |      |      |      |      |      |      |
|-----|-----|------|------|------|------|------|------|------|------|------|------|
| 270 | 10  | 21,0 | 19,8 | 18,9 | 18,7 | 19,4 | 20,2 | 20,5 | 20,1 | 19,1 | 18,2 |
| 270 | 20  | 19,6 | 18,6 | 18,0 | 18,2 | 19,2 | 20,0 | 20,0 | 19,1 | 17,7 | 16,6 |
| 270 | 30  | 17,8 | 17,0 | 16,8 | 17,4 | 18,5 | 19,2 | 18,7 | 17,3 | 15,6 | 14,3 |
| 270 | 40  | 16,1 | 15,5 | 15,6 | 16,4 | 17,6 | 17,9 | 17,0 | 15,1 | 13,1 | 11,8 |
| 270 | 50  | 14,7 | 14,4 | 14,7 | 15,7 | 16,7 | 16,6 | 15,2 | 12,9 | 10,9 | 9,6  |
| 270 | 60  | 14,0 | 13,9 | 14,3 | 15,4 | 16,0 | 15,5 | 13,6 | 11,2 | 9,2  | 8,1  |
| 270 | 70  | 14,1 | 14,1 | 14,6 | 15,5 | 15,7 | 14,7 | 12,5 | 10,1 | 8,4  | 7,5  |
| 270 | 80  | 14,9 | 14,9 | 15,4 | 15,9 | 15,7 | 14,3 | 12,0 | 9,9  | 8,4  | 7,8  |
| 270 | 90  | 16,1 | 16,0 | 16,3 | 16,5 | 15,9 | 14,3 | 12,1 | 10,2 | 9,0  | 8,6  |
| 270 | 100 | 17,4 | 17,2 | 17,3 | 17,0 | 16,1 | 14,5 | 12,4 | 10,8 | 9,9  | 9,6  |
| 270 | 110 | 18,4 | 18,1 | 17,8 | 17,3 | 16,2 | 14,6 | 12,8 | 11,4 | 10,7 | 10,5 |
| 270 | 120 | 18,9 | 18,4 | 17,9 | 17,1 | 15,9 | 14,3 | 12,8 | 11,7 | 11,1 | 11,1 |
| 270 | 130 | 18,9 | 18,2 | 17,4 | 16,4 | 15,1 | 13,7 | 12,4 | 11,5 | 11,1 | 11,2 |
| 270 | 140 | 18,3 | 17,4 | 16,4 | 15,2 | 13,9 | 12,6 | 11,5 | 10,9 | 10,7 | 10,9 |
| 270 | 150 | 17,4 | 16,3 | 15,1 | 13,8 | 12,6 | 11,4 | 10,5 | 10,0 | 10,0 | 10,3 |
| 270 | 160 | 16,5 | 15,3 | 13,9 | 12,5 | 11,3 | 10,3 | 9,6  | 9,3  | 9,3  | 9,7  |
| 270 | 170 | 15,9 | 14,5 | 13,0 | 11,6 | 10,5 | 9,6  | 9,1  | 8,9  | 9,1  | 9,5  |
| 270 | 180 | 15,9 | 14,4 | 12,8 | 11,4 | 10,3 | 9,5  | 9,2  | 9,2  | 9,4  | 9,8  |
| 270 | 190 | 16,5 | 14,9 | 13,3 | 11,8 | 10,8 | 10,2 | 10,0 | 10,0 | 10,3 | 10,7 |
| 270 | 200 | 17,6 | 16,1 | 14,3 | 12,9 | 11,9 | 11,4 | 11,2 | 11,3 | 11,6 | 12,0 |
| 270 | 210 | 19,1 | 17,5 | 15,7 | 14,3 | 13,3 | 12,8 | 12,7 | 12,9 | 13,1 | 13,5 |
| 270 | 220 | 20,5 | 18,9 | 17,1 | 15,6 | 14,6 | 14,1 | 14,1 | 14,2 | 14,5 | 14,9 |
| 270 | 230 | 21,6 | 19,9 | 18,2 | 16,7 | 15,6 | 15,1 | 15,0 | 15,2 | 15,5 | 15,8 |
| 270 | 240 | 22,1 | 20,4 | 18,7 | 17,1 | 16,1 | 15,5 | 15,4 | 15,6 | 15,8 | 16,2 |
| 270 | 250 | 22,0 | 20,3 | 18,5 | 17,0 | 15,9 | 15,3 | 15,2 | 15,3 | 15,6 | 15,9 |
| 270 | 260 | 21,3 | 19,7 | 17,9 | 16,3 | 15,2 | 14,6 | 14,4 | 14,6 | 14,8 | 15,1 |
| 270 | 270 | 20,4 | 18,7 | 17,0 | 15,4 | 14,2 | 13,6 | 13,4 | 13,5 | 13,7 | 14,0 |
| 270 | 280 | 19,4 | 17,8 | 16,0 | 14,4 | 13,2 | 12,6 | 12,4 | 12,5 | 12,7 | 13,1 |
| 270 | 290 | 18,6 | 17,0 | 15,3 | 13,7 | 12,5 | 11,9 | 11,8 | 11,9 | 12,2 | 12,5 |
| 270 | 300 | 18,3 | 16,8 | 15,0 | 13,5 | 12,4 | 11,9 | 11,8 | 12,0 | 12,3 | 12,7 |
| 270 | 310 | 18,6 | 17,0 | 15,3 | 13,9 | 12,9 | 12,5 | 12,6 | 12,9 | 13,1 | 13,5 |
| 270 | 320 | 19,3 | 17,7 | 16,1 | 14,8 | 14,0 | 13,8 | 14,0 | 14,3 | 14,5 | 14,8 |
| 270 | 330 | 20,2 | 18,7 | 17,1 | 16,0 | 15,4 | 15,4 | 15,8 | 16,1 | 16,2 | 16,4 |
| 270 | 340 | 21,1 | 19,6 | 18,2 | 17,2 | 16,9 | 17,1 | 17,6 | 17,8 | 17,8 | 17,8 |
| 270 | 350 | 21,7 | 20,3 | 19,0 | 18,2 | 18,2 | 18,7 | 19,1 | 19,3 | 19,1 | 18,8 |
| 270 | 360 | 21,7 | 20,4 | 19,2 | 18,8 | 19,1 | 19,7 | 20,2 | 20,1 | 19,6 | 19,0 |
| 280 | 0   | 16,5 | 15,8 | 15,8 | 16,7 | 18,1 | 19,0 | 19,2 | 18,2 | 16,6 | 15,3 |
| 280 | 10  | 15,7 | 15,3 | 15,8 | 17,2 | 18,9 | 19,9 | 19,6 | 18,0 | 15,9 | 14,3 |
| 280 | 20  | 14,4 | 14,4 | 15,4 | 17,2 | 19,2 | 20,0 | 19,0 | 16,6 | 14,1 | 12,3 |
| 280 | 30  | 12,9 | 13,2 | 14,7 | 17,0 | 18,9 | 19,3 | 17,5 | 14,4 | 11,5 | 9,7  |
| 280 | 40  | 11,5 | 12,2 | 14,1 | 16,6 | 18,3 | 17,9 | 15,3 | 11,8 | 8,8  | 7,1  |
| 280 | 50  | 10,5 | 11,6 | 13,7 | 16,2 | 17,3 | 16,2 | 13,0 | 9,2  | 6,4  | 4,9  |
| 280 | 60  | 10,2 | 11,6 | 13,8 | 16,0 | 16,4 | 14,6 | 11,0 | 7,3  | 4,8  | 3,6  |
| 280 | 70  | 10,7 | 12,2 | 14,3 | 15,9 | 15,7 | 13,3 | 9,6  | 6,3  | 4,2  | 3,2  |
| 280 | 80  | 11,8 | 13,2 | 15,0 | 16,0 | 15,2 | 12,5 | 9,0  | 6,1  | 4,4  | 3,7  |
| 280 | 90  | 13,1 | 14,4 | 15,7 | 16,1 | 15,0 | 12,2 | 9,1  | 6,6  | 5,2  | 4,7  |
| 280 | 100 | 14,5 | 15,4 | 16,3 | 16,3 | 14,8 | 12,3 | 9,5  | 7,4  | 6,2  | 6,0  |
| 280 | 110 | 15,4 | 16,0 | 16,5 | 16,1 | 14,7 | 12,3 | 9,9  | 8,2  | 7,2  | 7,1  |
| 280 | 120 | 15,9 | 16,1 | 16,2 | 15,6 | 14,2 | 12,1 | 10,1 | 8,6  | 7,8  | 7,8  |
| 280 | 130 | 15,7 | 15,6 | 15,4 | 14,7 | 13,3 | 11,5 | 9,8  | 8,5  | 8,0  | 8,0  |
| 280 | 140 | 15,0 | 14,6 | 14,1 | 13,3 | 12,1 | 10,5 | 9,1  | 8,1  | 7,6  | 7,8  |
| 280 | 150 | 13,9 | 13,3 | 12,6 | 11,8 | 10,7 | 9,4  | 8,2  | 7,4  | 7,0  | 7,2  |
| 280 | 160 | 12,9 | 12,1 | 11,3 | 10,4 | 9,4  | 8,3  | 7,3  | 6,7  | 6,5  | 6,7  |
| 280 | 170 | 12,2 | 11,2 | 10,3 | 9,4  | 8,6  | 7,7  | 6,9  | 6,4  | 6,3  | 6,5  |
| 280 | 180 | 12,0 | 10,8 | 9,9  | 9,1  | 8,4  | 7,6  | 7,0  | 6,6  | 6,5  | 6,8  |
| 280 | 190 | 12,4 | 11,2 | 10,2 | 9,4  | 8,8  | 8,2  | 7,7  | 7,4  | 7,4  | 7,6  |

|     |     |      |      |      |      |      |      |      |      |      |      |
|-----|-----|------|------|------|------|------|------|------|------|------|------|
| 100 | 200 | 20,9 | 21,5 | 21,3 | 20,3 | 18,5 | 16,7 | 15,3 | 14,4 | 13,7 | 13,1 |
| 100 | 210 | 21,8 | 22,3 | 22,1 | 21,0 | 19,2 | 17,5 | 16,1 | 15,1 | 14,4 | 13,9 |
| 100 | 220 | 22,7 | 23,1 | 22,9 | 21,8 | 20,0 | 18,2 | 16,7 | 15,8 | 15,1 | 14,6 |
| 100 | 230 | 23,2 | 23,6 | 23,3 | 22,2 | 20,4 | 18,6 | 17,1 | 16,1 | 15,5 | 15,1 |
| 100 | 240 | 23,3 | 23,5 | 23,2 | 22,1 | 20,3 | 18,4 | 17,0 | 16,0 | 15,4 | 15,1 |
| 100 | 250 | 22,7 | 22,9 | 22,5 | 21,4 | 19,6 | 17,8 | 16,4 | 15,4 | 14,9 | 14,7 |
| 100 | 260 | 21,7 | 21,9 | 21,5 | 20,4 | 18,5 | 16,8 | 15,4 | 14,5 | 14,0 | 13,9 |
| 100 | 270 | 20,6 | 20,7 | 20,3 | 19,2 | 17,4 | 15,6 | 14,2 | 13,4 | 13,0 | 13,0 |
| 100 | 280 | 19,6 | 19,7 | 19,3 | 18,2 | 16,4 | 14,7 | 13,3 | 12,5 | 12,3 | 12,4 |
| 100 | 290 | 19,0 | 19,3 | 18,9 | 17,8 | 16,0 | 14,2 | 12,9 | 12,2 | 12,1 | 12,3 |
| 100 | 300 | 19,2 | 19,5 | 19,1 | 18,0 | 16,3 | 14,5 | 13,3 | 12,7 | 12,6 | 13,0 |
| 100 | 310 | 20,1 | 20,5 | 20,2 | 19,1 | 17,4 | 15,7 | 14,5 | 13,9 | 14,0 | 14,5 |
| 100 | 320 | 21,6 | 22,1 | 21,8 | 20,8 | 19,1 | 17,5 | 16,4 | 15,9 | 16,0 | 16,6 |
| 100 | 330 | 23,5 | 24,0 | 23,8 | 22,8 | 21,2 | 19,6 | 18,6 | 18,2 | 18,3 | 18,8 |
| 100 | 340 | 25,2 | 25,8 | 25,7 | 24,8 | 23,2 | 21,7 | 20,8 | 20,4 | 20,4 | 20,8 |
| 100 | 350 | 26,6 | 27,3 | 27,1 | 26,3 | 24,7 | 23,3 | 22,4 | 22,0 | 22,0 | 22,2 |
| 100 | 360 | 27,3 | 28,0 | 27,9 | 27,0 | 25,5 | 24,1 | 23,2 | 22,8 | 22,7 | 22,7 |
| 110 | 0   | 31,7 | 32,0 | 31,5 | 30,1 | 28,4 | 27,0 | 26,3 | 25,8 | 25,6 | 25,3 |
| 110 | 10  | 31,5 | 31,8 | 31,3 | 30,0 | 28,3 | 26,9 | 26,1 | 25,6 | 25,2 | 24,8 |
| 110 | 20  | 30,7 | 30,9 | 30,4 | 29,1 | 27,4 | 26,0 | 25,2 | 24,6 | 24,1 | 23,7 |
| 110 | 30  | 29,4 | 29,7 | 29,2 | 27,8 | 26,1 | 24,7 | 23,8 | 23,1 | 22,5 | 22,0 |
| 110 | 40  | 28,1 | 28,3 | 27,7 | 26,3 | 24,6 | 23,1 | 22,2 | 21,4 | 20,8 | 20,3 |
| 110 | 50  | 26,9 | 27,2 | 26,5 | 25,1 | 23,3 | 21,7 | 20,8 | 20,0 | 19,3 | 18,8 |
| 110 | 60  | 26,3 | 26,5 | 25,8 | 24,3 | 22,4 | 20,9 | 19,9 | 19,1 | 18,4 | 17,9 |
| 110 | 70  | 26,3 | 26,5 | 25,7 | 24,2 | 22,3 | 20,7 | 19,7 | 18,9 | 18,2 | 17,7 |
| 110 | 80  | 26,9 | 27,0 | 26,3 | 24,7 | 22,8 | 21,1 | 20,1 | 19,3 | 18,7 | 18,2 |
| 110 | 90  | 27,8 | 28,0 | 27,2 | 25,6 | 23,7 | 22,0 | 21,0 | 20,2 | 19,6 | 19,1 |
| 110 | 100 | 28,7 | 28,9 | 28,2 | 26,6 | 24,6 | 23,0 | 21,9 | 21,2 | 20,6 | 20,2 |
| 110 | 110 | 29,4 | 29,6 | 28,9 | 27,4 | 25,4 | 23,7 | 22,7 | 22,0 | 21,4 | 20,9 |
| 110 | 120 | 29,6 | 29,8 | 29,1 | 27,6 | 25,6 | 24,0 | 23,0 | 22,3 | 21,7 | 21,3 |
| 110 | 130 | 29,1 | 29,4 | 28,7 | 27,2 | 25,3 | 23,6 | 22,7 | 22,0 | 21,4 | 21,0 |
| 110 | 140 | 28,1 | 28,4 | 27,8 | 26,3 | 24,4 | 22,8 | 21,8 | 21,1 | 20,6 | 20,1 |
| 110 | 150 | 26,8 | 27,0 | 26,4 | 25,0 | 23,1 | 21,5 | 20,6 | 19,9 | 19,3 | 18,8 |
| 110 | 160 | 25,4 | 25,6 | 25,0 | 23,6 | 21,8 | 20,2 | 19,2 | 18,5 | 17,9 | 17,4 |
| 110 | 170 | 24,3 | 24,5 | 23,9 | 22,5 | 20,6 | 19,1 | 18,1 | 17,4 | 16,7 | 16,2 |
| 110 | 180 | 23,7 | 24,0 | 23,4 | 21,9 | 20,1 | 18,5 | 17,5 | 16,7 | 16,1 | 15,5 |
| 110 | 190 | 23,9 | 24,1 | 23,5 | 22,1 | 20,2 | 18,5 | 17,5 | 16,7 | 16,1 | 15,5 |
| 110 | 200 | 24,6 | 24,8 | 24,2 | 22,7 | 20,8 | 19,1 | 18,1 | 17,3 | 16,6 | 16,1 |
| 110 | 210 | 25,6 | 25,8 | 25,2 | 23,7 | 21,7 | 20,1 | 19,0 | 18,1 | 17,5 | 17,0 |
| 110 | 220 | 26,6 | 26,8 | 26,1 | 24,6 | 22,6 | 20,9 | 19,8 | 19,0 | 18,3 | 18,0 |
| 110 | 230 | 27,2 | 27,3 | 26,7 | 25,1 | 23,2 | 21,4 | 20,3 | 19,5 | 18,9 | 18,6 |
| 110 | 240 | 27,3 | 27,4 | 26,7 | 25,1 | 23,2 | 21,4 | 20,3 | 19,5 | 18,9 | 18,7 |
| 110 | 250 | 26,8 | 26,8 | 26,1 | 24,6 | 22,6 | 20,9 | 19,7 | 18,9 | 18,5 | 18,3 |
| 110 | 260 | 25,9 | 25,9 | 25,1 | 23,6 | 21,6 | 19,9 | 18,8 | 18,0 | 17,6 | 17,6 |
| 110 | 270 | 24,8 | 24,8 | 24,0 | 22,5 | 20,5 | 18,8 | 17,7 | 17,1 | 16,7 | 16,8 |
| 110 | 280 | 23,9 | 23,9 | 23,1 | 21,6 | 19,6 | 17,9 | 16,9 | 16,3 | 16,0 | 16,2 |
| 110 | 290 | 23,4 | 23,5 | 22,7 | 21,3 | 19,2 | 17,6 | 16,5 | 16,0 | 15,9 | 16,1 |
| 110 | 300 | 23,7 | 23,8 | 23,1 | 21,6 | 19,6 | 17,9 | 16,9 | 16,5 | 16,4 | 16,7 |
| 110 | 310 | 24,7 | 24,8 | 24,1 | 22,7 | 20,7 | 19,1 | 18,2 | 17,8 | 17,8 | 18,1 |
| 110 | 320 | 26,3 | 26,5 | 25,8 | 24,4 | 22,5 | 20,9 | 20,0 | 19,7 | 19,7 | 20,0 |
| 110 | 330 | 28,1 | 28,4 | 27,8 | 26,4 | 24,5 | 23,0 | 22,2 | 21,8 | 21,8 | 22,0 |
| 110 | 340 | 29,9 | 30,1 | 29,5 | 28,2 | 26,4 | 24,9 | 24,1 | 23,8 | 23,7 | 23,7 |
| 110 | 350 | 31,1 | 31,4 | 30,9 | 29,5 | 27,7 | 26,4 | 25,6 | 25,2 | 25,0 | 24,9 |
| 110 | 360 | 31,7 | 32,0 | 31,5 | 30,1 | 28,4 | 27,0 | 26,3 | 25,8 | 25,6 | 25,3 |
| 120 | 0   | 33,7 | 33,5 | 32,6 | 31,0 | 29,3 | 28,0 | 27,3 | 26,8 | 26,4 | 26,0 |
| 120 | 10  | 33,3 | 33,2 | 32,2 | 30,6 | 29,0 | 27,7 | 27,0 | 26,4 | 25,9 | 25,5 |

|     |     |      |      |      |      |      |      |      |      |      |      |
|-----|-----|------|------|------|------|------|------|------|------|------|------|
| 280 | 200 | 13,4 | 12,1 | 11,0 | 10,3 | 9,7  | 9,2  | 8,8  | 8,6  | 8,6  | 8,9  |
| 280 | 210 | 14,7 | 13,4 | 12,2 | 11,4 | 10,9 | 10,4 | 10,1 | 10,0 | 10,0 | 10,3 |
| 280 | 220 | 16,0 | 14,7 | 13,4 | 12,6 | 12,1 | 11,6 | 11,4 | 11,3 | 11,3 | 11,6 |
| 280 | 230 | 17,0 | 15,6 | 14,4 | 13,5 | 12,9 | 12,5 | 12,3 | 12,2 | 12,3 | 12,5 |
| 280 | 240 | 17,5 | 16,1 | 14,8 | 13,9 | 13,3 | 12,9 | 12,7 | 12,6 | 12,6 | 12,9 |
| 280 | 250 | 17,4 | 15,9 | 14,7 | 13,7 | 13,1 | 12,7 | 12,4 | 12,3 | 12,4 | 12,6 |
| 280 | 260 | 16,7 | 15,3 | 14,0 | 13,1 | 12,4 | 11,9 | 11,7 | 11,5 | 11,6 | 11,8 |
| 280 | 270 | 15,8 | 14,3 | 13,1 | 12,1 | 11,4 | 10,9 | 10,6 | 10,5 | 10,6 | 10,8 |
| 280 | 280 | 14,8 | 13,3 | 12,1 | 11,1 | 10,4 | 9,9  | 9,7  | 9,6  | 9,7  | 9,9  |
| 280 | 290 | 13,9 | 12,5 | 11,3 | 10,4 | 9,7  | 9,3  | 9,2  | 9,2  | 9,2  | 9,4  |
| 280 | 300 | 13,6 | 12,2 | 11,0 | 10,2 | 9,6  | 9,4  | 9,3  | 9,4  | 9,4  | 9,5  |
| 280 | 310 | 13,7 | 12,4 | 11,3 | 10,6 | 10,2 | 10,2 | 10,2 | 10,3 | 10,2 | 10,3 |
| 280 | 320 | 14,3 | 13,0 | 12,0 | 11,5 | 11,4 | 11,6 | 11,8 | 11,8 | 11,7 | 11,6 |
| 280 | 330 | 15,1 | 14,0 | 13,2 | 12,9 | 13,1 | 13,5 | 13,8 | 13,8 | 13,4 | 13,1 |
| 280 | 340 | 16,0 | 14,9 | 14,3 | 14,3 | 15,0 | 15,5 | 15,9 | 15,7 | 15,1 | 14,5 |
| 280 | 350 | 16,5 | 15,6 | 15,3 | 15,7 | 16,7 | 17,5 | 17,8 | 17,3 | 16,2 | 15,3 |
| 280 | 360 | 16,5 | 15,8 | 15,8 | 16,7 | 18,1 | 19,0 | 19,2 | 18,2 | 16,6 | 15,3 |
| 290 | 0   | 13,5 | 14,2 | 16,0 | 18,3 | 20,4 | 21,2 | 20,2 | 17,5 | 14,6 | 12,5 |
| 290 | 10  | 13,0 | 14,2 | 16,6 | 19,5 | 21,8 | 22,3 | 20,4 | 16,8 | 13,4 | 11,1 |
| 290 | 20  | 12,1 | 13,9 | 16,9 | 20,3 | 22,6 | 22,3 | 19,3 | 14,9 | 11,1 | 8,8  |
| 290 | 30  | 11,0 | 13,4 | 17,0 | 20,6 | 22,4 | 21,2 | 17,1 | 12,1 | 8,2  | 6,0  |
| 290 | 40  | 10,1 | 13,0 | 17,0 | 20,5 | 21,5 | 19,2 | 14,2 | 9,1  | 5,4  | 3,4  |
| 290 | 50  | 9,7  | 13,0 | 17,2 | 20,1 | 20,1 | 16,8 | 11,4 | 6,4  | 3,1  | 1,5  |
| 290 | 60  | 9,9  | 13,6 | 17,4 | 19,4 | 18,6 | 14,5 | 9,2  | 4,7  | 1,7  | 0,6  |
| 290 | 70  | 10,9 | 14,4 | 17,7 | 18,8 | 17,1 | 12,8 | 7,8  | 3,8  | 1,4  | 0,6  |
| 290 | 80  | 12,2 | 15,4 | 17,9 | 18,3 | 16,0 | 11,8 | 7,4  | 4,0  | 2,0  | 1,4  |
| 290 | 90  | 13,6 | 16,3 | 18,0 | 17,9 | 15,4 | 11,5 | 7,6  | 4,7  | 3,1  | 2,7  |
| 290 | 100 | 14,8 | 16,9 | 18,1 | 17,5 | 15,2 | 11,7 | 8,3  | 5,8  | 4,4  | 4,2  |
| 290 | 110 | 15,6 | 17,1 | 17,8 | 17,1 | 14,9 | 11,9 | 8,9  | 6,8  | 5,6  | 5,4  |
| 290 | 120 | 15,7 | 16,8 | 17,2 | 16,4 | 14,5 | 11,9 | 9,3  | 7,4  | 6,4  | 6,3  |
| 290 | 130 | 15,2 | 15,9 | 16,1 | 15,4 | 13,7 | 11,5 | 9,3  | 7,6  | 6,7  | 6,6  |
| 290 | 140 | 14,2 | 14,6 | 14,7 | 14,0 | 12,6 | 10,7 | 8,8  | 7,3  | 6,5  | 6,5  |
| 290 | 150 | 12,9 | 13,1 | 13,1 | 12,5 | 11,3 | 9,7  | 8,0  | 6,7  | 6,0  | 6,0  |
| 290 | 160 | 11,6 | 11,6 | 11,5 | 11,1 | 10,1 | 8,7  | 7,2  | 6,1  | 5,4  | 5,4  |
| 290 | 170 | 10,6 | 10,5 | 10,4 | 10,0 | 9,2  | 8,1  | 6,8  | 5,7  | 5,1  | 5,1  |
| 290 | 180 | 10,2 | 9,9  | 9,8  | 9,5  | 8,9  | 7,9  | 6,8  | 5,8  | 5,2  | 5,3  |
| 290 | 190 | 10,3 | 10,0 | 9,8  | 9,6  | 9,1  | 8,3  | 7,3  | 6,4  | 5,9  | 5,9  |
| 290 | 200 | 11,1 | 10,6 | 10,4 | 10,2 | 9,8  | 9,1  | 8,2  | 7,4  | 7,0  | 7,0  |
| 290 | 210 | 12,1 | 11,6 | 11,3 | 11,1 | 10,8 | 10,1 | 9,3  | 8,6  | 8,2  | 8,3  |
| 290 | 220 | 13,2 | 12,6 | 12,3 | 12,1 | 11,8 | 11,2 | 10,4 | 9,8  | 9,4  | 9,4  |
| 290 | 230 | 14,1 | 13,4 | 13,0 | 12,8 | 12,5 | 11,9 | 11,2 | 10,6 | 10,3 | 10,3 |
| 290 | 240 | 14,4 | 13,7 | 13,4 | 13,2 | 12,8 | 12,2 | 11,5 | 10,9 | 10,6 | 10,6 |
| 290 | 250 | 14,3 | 13,5 | 13,2 | 12,9 | 12,6 | 12,0 | 11,3 | 10,7 | 10,3 | 10,4 |
| 290 | 260 | 13,6 | 12,9 | 12,5 | 12,2 | 11,8 | 11,2 | 10,6 | 10,0 | 9,6  | 9,7  |
| 290 | 270 | 12,6 | 11,9 | 11,5 | 11,2 | 10,8 | 10,2 | 9,6  | 9,1  | 8,7  | 8,7  |
| 290 | 280 | 11,6 | 10,9 | 10,5 | 10,2 | 9,8  | 9,4  | 8,8  | 8,3  | 7,9  | 7,9  |
| 290 | 290 | 10,8 | 10,1 | 9,8  | 9,5  | 9,3  | 8,9  | 8,5  | 8,0  | 7,5  | 7,5  |
| 290 | 300 | 10,4 | 9,8  | 9,5  | 9,4  | 9,3  | 9,2  | 8,8  | 8,3  | 7,8  | 7,6  |
| 290 | 310 | 10,5 | 10,0 | 9,8  | 10,0 | 10,2 | 10,2 | 9,9  | 9,4  | 8,8  | 8,4  |
| 290 | 320 | 11,1 | 10,7 | 10,7 | 11,1 | 11,7 | 11,9 | 11,8 | 11,1 | 10,2 | 9,6  |
| 290 | 330 | 12,0 | 11,7 | 12,0 | 12,8 | 13,7 | 14,2 | 14,1 | 13,3 | 12,0 | 11,1 |
| 290 | 340 | 12,9 | 12,8 | 13,5 | 14,7 | 16,1 | 16,8 | 16,6 | 15,3 | 13,6 | 12,3 |
| 290 | 350 | 13,4 | 13,7 | 14,9 | 16,6 | 18,4 | 19,3 | 18,8 | 16,9 | 14,6 | 12,9 |
| 290 | 360 | 13,5 | 14,2 | 16,0 | 18,3 | 20,4 | 21,2 | 20,2 | 17,5 | 14,6 | 12,5 |
| 300 | 0   | 14,5 | 17,2 | 20,7 | 24,1 | 26,3 | 26,0 | 22,7 | 17,9 | 13,7 | 11,2 |
| 300 | 10  | 14,6 | 17,9 | 22,2 | 26,0 | 28,0 | 26,7 | 22,1 | 16,5 | 12,0 | 9,4  |

|     |     |      |      |      |      |      |      |      |      |      |      |
|-----|-----|------|------|------|------|------|------|------|------|------|------|
| 120 | 20  | 32,3 | 32,2 | 31,2 | 29,6 | 27,9 | 26,7 | 26,0 | 25,3 | 24,8 | 24,2 |
| 120 | 30  | 30,8 | 30,7 | 29,7 | 28,1 | 26,4 | 25,1 | 24,4 | 23,7 | 23,1 | 22,5 |
| 120 | 40  | 29,3 | 29,1 | 28,1 | 26,4 | 24,7 | 23,5 | 22,7 | 21,9 | 21,3 | 20,7 |
| 120 | 50  | 27,9 | 27,8 | 26,7 | 25,0 | 23,3 | 22,0 | 21,1 | 20,4 | 19,7 | 19,2 |
| 120 | 60  | 27,1 | 26,9 | 25,8 | 24,1 | 22,4 | 21,0 | 20,2 | 19,4 | 18,7 | 18,2 |
| 120 | 70  | 27,0 | 26,8 | 25,6 | 23,9 | 22,1 | 20,7 | 19,9 | 19,1 | 18,5 | 17,9 |
| 120 | 80  | 27,6 | 27,3 | 26,1 | 24,3 | 22,5 | 21,1 | 20,3 | 19,5 | 18,9 | 18,4 |
| 120 | 90  | 28,5 | 28,2 | 27,0 | 25,2 | 23,3 | 21,9 | 21,1 | 20,4 | 19,8 | 19,2 |
| 120 | 100 | 29,4 | 29,1 | 27,9 | 26,1 | 24,3 | 22,8 | 22,0 | 21,3 | 20,7 | 20,2 |
| 120 | 110 | 30,1 | 29,8 | 28,6 | 26,8 | 25,0 | 23,6 | 22,8 | 22,1 | 21,5 | 21,0 |
| 120 | 120 | 30,3 | 30,0 | 28,9 | 27,1 | 25,3 | 23,8 | 23,1 | 22,4 | 21,9 | 21,4 |
| 120 | 130 | 29,9 | 29,7 | 28,6 | 26,8 | 25,0 | 23,6 | 22,8 | 22,2 | 21,6 | 21,1 |
| 120 | 140 | 29,0 | 28,8 | 27,7 | 26,0 | 24,2 | 22,8 | 22,0 | 21,4 | 20,8 | 20,3 |
| 120 | 150 | 27,8 | 27,5 | 26,5 | 24,8 | 23,0 | 21,6 | 20,9 | 20,2 | 19,6 | 19,1 |
| 120 | 160 | 26,5 | 26,3 | 25,2 | 23,5 | 21,7 | 20,4 | 19,6 | 19,0 | 18,4 | 17,9 |
| 120 | 170 | 25,5 | 25,3 | 24,2 | 22,6 | 20,8 | 19,4 | 18,7 | 18,0 | 17,4 | 16,9 |
| 120 | 180 | 25,1 | 24,9 | 23,9 | 22,2 | 20,4 | 19,0 | 18,3 | 17,6 | 17,0 | 16,5 |
| 120 | 190 | 25,5 | 25,3 | 24,2 | 22,5 | 20,7 | 19,3 | 18,5 | 17,9 | 17,2 | 16,7 |
| 120 | 200 | 26,4 | 26,2 | 25,1 | 23,4 | 21,6 | 20,1 | 19,3 | 18,7 | 18,0 | 17,5 |
| 120 | 210 | 27,7 | 27,4 | 26,3 | 24,6 | 22,7 | 21,3 | 20,4 | 19,7 | 19,1 | 18,7 |
| 120 | 220 | 28,8 | 28,6 | 27,4 | 25,7 | 23,8 | 22,3 | 21,4 | 20,7 | 20,1 | 19,8 |
| 120 | 230 | 29,5 | 29,3 | 28,2 | 26,4 | 24,4 | 23,0 | 22,0 | 21,3 | 20,8 | 20,5 |
| 120 | 240 | 29,7 | 29,4 | 28,3 | 26,5 | 24,5 | 23,0 | 22,1 | 21,4 | 20,9 | 20,7 |
| 120 | 250 | 29,2 | 28,9 | 27,8 | 26,0 | 24,1 | 22,5 | 21,6 | 21,0 | 20,5 | 20,4 |
| 120 | 260 | 28,4 | 28,1 | 27,0 | 25,1 | 23,2 | 21,6 | 20,7 | 20,1 | 19,8 | 19,7 |
| 120 | 270 | 27,3 | 27,0 | 25,9 | 24,1 | 22,1 | 20,6 | 19,7 | 19,2 | 18,8 | 18,8 |
| 120 | 280 | 26,5 | 26,2 | 25,0 | 23,2 | 21,2 | 19,7 | 18,9 | 18,4 | 18,1 | 18,2 |
| 120 | 290 | 26,1 | 25,8 | 24,7 | 22,8 | 20,8 | 19,3 | 18,5 | 18,1 | 17,9 | 18,0 |
| 120 | 300 | 26,3 | 26,1 | 25,0 | 23,1 | 21,2 | 19,7 | 18,9 | 18,6 | 18,4 | 18,5 |
| 120 | 310 | 27,3 | 27,1 | 26,0 | 24,2 | 22,2 | 20,8 | 20,1 | 19,7 | 19,6 | 19,7 |
| 120 | 320 | 28,9 | 28,7 | 27,6 | 25,8 | 23,9 | 22,5 | 21,8 | 21,5 | 21,3 | 21,4 |
| 120 | 330 | 30,6 | 30,4 | 29,4 | 27,6 | 25,8 | 24,4 | 23,8 | 23,5 | 23,3 | 23,2 |
| 120 | 340 | 32,2 | 32,0 | 31,0 | 29,3 | 27,5 | 26,2 | 25,6 | 25,2 | 24,9 | 24,8 |
| 120 | 350 | 33,3 | 33,1 | 32,2 | 30,5 | 28,8 | 27,5 | 26,8 | 26,4 | 26,1 | 25,8 |
| 120 | 360 | 33,7 | 33,5 | 32,6 | 31,0 | 29,3 | 28,0 | 27,3 | 26,8 | 26,4 | 26,0 |
| 130 | 0   | 32,7 | 32,3 | 30,9 | 29,3 | 27,8 | 26,7 | 26,1 | 25,5 | 24,9 | 24,5 |
| 130 | 10  | 32,2 | 31,7 | 30,4 | 28,8 | 27,3 | 26,3 | 25,7 | 25,0 | 24,4 | 23,9 |
| 130 | 20  | 31,1 | 30,6 | 29,3 | 27,7 | 26,2 | 25,2 | 24,5 | 23,8 | 23,2 | 22,6 |
| 130 | 30  | 29,5 | 29,0 | 27,7 | 26,1 | 24,6 | 23,6 | 22,9 | 22,1 | 21,4 | 20,9 |
| 130 | 40  | 27,8 | 27,2 | 25,9 | 24,3 | 22,9 | 21,8 | 21,1 | 20,3 | 19,6 | 19,1 |
| 130 | 50  | 26,4 | 25,8 | 24,4 | 22,8 | 21,4 | 20,3 | 19,5 | 18,7 | 18,0 | 17,5 |
| 130 | 60  | 25,5 | 24,8 | 23,5 | 21,9 | 20,4 | 19,3 | 18,5 | 17,7 | 17,0 | 16,5 |
| 130 | 70  | 25,3 | 24,6 | 23,2 | 21,6 | 20,1 | 19,0 | 18,2 | 17,4 | 16,7 | 16,2 |
| 130 | 80  | 25,8 | 25,1 | 23,6 | 22,0 | 20,4 | 19,3 | 18,5 | 17,7 | 17,1 | 16,6 |
| 130 | 90  | 26,7 | 25,9 | 24,5 | 22,8 | 21,2 | 20,1 | 19,3 | 18,6 | 17,9 | 17,4 |
| 130 | 100 | 27,6 | 26,9 | 25,4 | 23,7 | 22,1 | 21,0 | 20,3 | 19,5 | 18,9 | 18,4 |
| 130 | 110 | 28,3 | 27,6 | 26,1 | 24,4 | 22,8 | 21,7 | 21,0 | 20,3 | 19,7 | 19,1 |
| 130 | 120 | 28,5 | 27,8 | 26,4 | 24,7 | 23,1 | 22,0 | 21,3 | 20,6 | 20,0 | 19,5 |
| 130 | 130 | 28,2 | 27,5 | 26,1 | 24,4 | 22,9 | 21,7 | 21,1 | 20,4 | 19,8 | 19,3 |
| 130 | 140 | 27,4 | 26,7 | 25,3 | 23,6 | 22,1 | 21,0 | 20,3 | 19,7 | 19,1 | 18,5 |
| 130 | 150 | 26,2 | 25,6 | 24,2 | 22,5 | 21,0 | 19,9 | 19,3 | 18,6 | 18,0 | 17,5 |
| 130 | 160 | 25,1 | 24,4 | 23,1 | 21,4 | 19,9 | 18,8 | 18,2 | 17,5 | 16,9 | 16,4 |
| 130 | 170 | 24,2 | 23,6 | 22,3 | 20,6 | 19,1 | 18,0 | 17,4 | 16,7 | 16,1 | 15,6 |
| 130 | 180 | 24,0 | 23,4 | 22,1 | 20,5 | 19,0 | 17,8 | 17,2 | 16,6 | 16,0 | 15,5 |
| 130 | 190 | 24,6 | 24,0 | 22,6 | 21,0 | 19,5 | 18,3 | 17,7 | 17,0 | 16,4 | 16,0 |
| 130 | 200 | 25,7 | 25,1 | 23,7 | 22,1 | 20,6 | 19,4 | 18,7 | 18,1 | 17,4 | 17,0 |

|     |     |      |      |      |      |      |      |      |      |      |      |
|-----|-----|------|------|------|------|------|------|------|------|------|------|
| 300 | 20  | 14,3 | 18,4 | 23,2 | 27,2 | 28,5 | 25,9 | 20,1 | 14,0 | 9,5  | 6,9  |
| 300 | 30  | 14,0 | 18,8 | 24,0 | 27,6 | 27,7 | 23,7 | 17,0 | 10,8 | 6,5  | 4,3  |
| 300 | 40  | 13,9 | 19,2 | 24,4 | 27,1 | 26,0 | 20,7 | 13,7 | 7,8  | 3,9  | 2,0  |
| 300 | 50  | 14,2 | 19,8 | 24,5 | 26,0 | 23,6 | 17,5 | 10,8 | 5,4  | 1,9  | 0,5  |
| 300 | 60  | 15,0 | 20,4 | 24,2 | 24,6 | 21,1 | 15,0 | 8,8  | 3,9  | 1,0  | 0,0  |
| 300 | 70  | 16,2 | 21,0 | 23,6 | 23,1 | 19,1 | 13,3 | 7,8  | 3,5  | 1,1  | 0,4  |
| 300 | 80  | 17,4 | 21,4 | 23,1 | 21,9 | 17,9 | 12,6 | 7,7  | 4,1  | 2,1  | 1,6  |
| 300 | 90  | 18,5 | 21,6 | 22,6 | 21,1 | 17,3 | 12,7 | 8,4  | 5,2  | 3,6  | 3,2  |
| 300 | 100 | 19,2 | 21,6 | 22,1 | 20,6 | 17,3 | 13,2 | 9,4  | 6,6  | 5,2  | 4,9  |
| 300 | 110 | 19,4 | 21,3 | 21,6 | 20,2 | 17,3 | 13,7 | 10,4 | 7,9  | 6,6  | 6,4  |
| 300 | 120 | 19,2 | 20,6 | 20,8 | 19,6 | 17,2 | 14,1 | 11,1 | 8,8  | 7,5  | 7,3  |
| 300 | 130 | 18,3 | 19,5 | 19,7 | 18,7 | 16,7 | 13,9 | 11,2 | 9,1  | 7,9  | 7,8  |
| 300 | 140 | 17,0 | 18,0 | 18,2 | 17,5 | 15,8 | 13,4 | 10,9 | 8,9  | 7,7  | 7,6  |
| 300 | 150 | 15,4 | 16,3 | 16,6 | 16,0 | 14,6 | 12,5 | 10,2 | 8,3  | 7,2  | 7,1  |
| 300 | 160 | 13,9 | 14,7 | 15,1 | 14,7 | 13,5 | 11,6 | 9,5  | 7,7  | 6,6  | 6,5  |
| 300 | 170 | 12,6 | 13,4 | 13,8 | 13,6 | 12,6 | 10,9 | 8,9  | 7,2  | 6,2  | 6,0  |
| 300 | 180 | 11,8 | 12,6 | 13,0 | 12,9 | 12,1 | 10,6 | 8,8  | 7,1  | 6,1  | 5,9  |
| 300 | 190 | 11,7 | 12,4 | 12,9 | 12,8 | 12,2 | 10,8 | 9,1  | 7,5  | 6,5  | 6,3  |
| 300 | 200 | 12,1 | 12,7 | 13,2 | 13,2 | 12,7 | 11,5 | 9,8  | 8,3  | 7,4  | 7,2  |
| 300 | 210 | 12,8 | 13,3 | 13,9 | 14,0 | 13,5 | 12,4 | 10,8 | 9,4  | 8,5  | 8,3  |
| 300 | 220 | 13,6 | 14,1 | 14,6 | 14,8 | 14,4 | 13,3 | 11,8 | 10,5 | 9,6  | 9,4  |
| 300 | 230 | 14,3 | 14,7 | 15,2 | 15,4 | 15,0 | 14,0 | 12,6 | 11,2 | 10,3 | 10,1 |
| 300 | 240 | 14,5 | 14,9 | 15,5 | 15,6 | 15,2 | 14,2 | 12,8 | 11,5 | 10,6 | 10,5 |
| 300 | 250 | 14,2 | 14,7 | 15,1 | 15,3 | 14,9 | 13,9 | 12,6 | 11,3 | 10,4 | 10,2 |
| 300 | 260 | 13,5 | 13,9 | 14,4 | 14,5 | 14,1 | 13,2 | 11,9 | 10,6 | 9,8  | 9,5  |
| 300 | 270 | 12,5 | 12,9 | 13,3 | 13,4 | 13,1 | 12,3 | 11,1 | 9,8  | 8,9  | 8,7  |
| 300 | 280 | 11,5 | 11,9 | 12,3 | 12,5 | 12,2 | 11,5 | 10,4 | 9,2  | 8,2  | 7,9  |
| 300 | 290 | 10,7 | 11,1 | 11,6 | 11,9 | 11,8 | 11,3 | 10,2 | 9,0  | 7,9  | 7,4  |
| 300 | 300 | 10,3 | 10,8 | 11,4 | 12,0 | 12,2 | 11,8 | 10,8 | 9,5  | 8,2  | 7,6  |
| 300 | 310 | 10,5 | 11,1 | 12,0 | 12,8 | 13,3 | 13,1 | 12,2 | 10,8 | 9,2  | 8,3  |
| 300 | 320 | 11,2 | 12,0 | 13,1 | 14,3 | 15,3 | 15,3 | 14,4 | 12,6 | 10,7 | 9,5  |
| 300 | 330 | 12,2 | 13,3 | 14,8 | 16,5 | 17,9 | 18,1 | 17,0 | 14,8 | 12,4 | 10,7 |
| 300 | 340 | 13,2 | 14,7 | 16,8 | 19,1 | 20,8 | 21,1 | 19,7 | 16,7 | 13,7 | 11,7 |
| 300 | 350 | 14,0 | 16,1 | 18,9 | 21,7 | 23,8 | 23,9 | 21,7 | 17,9 | 14,3 | 11,9 |
| 300 | 360 | 14,5 | 17,2 | 20,7 | 24,1 | 26,3 | 26,0 | 22,7 | 17,9 | 13,7 | 11,2 |
| 310 | 0   | 20,2 | 24,8 | 29,5 | 33,2 | 34,3 | 31,5 | 25,3 | 18,9 | 14,3 | 11,6 |
| 310 | 10  | 21,1 | 26,4 | 31,7 | 35,3 | 35,4 | 31,0 | 23,7 | 17,0 | 12,3 | 9,7  |
| 310 | 20  | 21,8 | 27,8 | 33,3 | 36,2 | 34,8 | 28,8 | 20,9 | 14,2 | 9,7  | 7,4  |
| 310 | 30  | 22,4 | 28,8 | 34,1 | 35,7 | 32,7 | 25,5 | 17,5 | 11,1 | 7,0  | 5,1  |
| 310 | 40  | 23,0 | 29,5 | 34,0 | 34,2 | 29,6 | 21,9 | 14,3 | 8,4  | 4,8  | 3,3  |
| 310 | 50  | 23,8 | 29,9 | 33,0 | 31,9 | 26,3 | 18,7 | 11,7 | 6,4  | 3,4  | 2,4  |
| 310 | 60  | 24,6 | 29,9 | 31,6 | 29,4 | 23,5 | 16,4 | 10,1 | 5,5  | 3,0  | 2,3  |
| 310 | 70  | 25,4 | 29,5 | 30,1 | 27,2 | 21,6 | 15,3 | 9,6  | 5,6  | 3,6  | 3,1  |
| 310 | 80  | 25,9 | 28,9 | 28,8 | 25,8 | 20,7 | 15,1 | 10,1 | 6,6  | 4,9  | 4,5  |
| 310 | 90  | 26,3 | 28,4 | 28,0 | 25,1 | 20,6 | 15,6 | 11,2 | 8,2  | 6,6  | 6,3  |
| 310 | 100 | 26,3 | 27,9 | 27,4 | 24,9 | 21,0 | 16,6 | 12,7 | 9,9  | 8,4  | 8,2  |
| 310 | 110 | 26,1 | 27,4 | 27,0 | 24,8 | 21,4 | 17,6 | 14,0 | 11,3 | 10,0 | 9,8  |
| 310 | 120 | 25,5 | 26,6 | 26,3 | 24,6 | 21,7 | 18,2 | 14,9 | 12,4 | 11,1 | 10,9 |
| 310 | 130 | 24,4 | 25,5 | 25,4 | 24,0 | 21,5 | 18,4 | 15,2 | 12,8 | 11,5 | 11,3 |
| 310 | 140 | 22,9 | 24,0 | 24,1 | 23,0 | 20,9 | 18,0 | 15,0 | 12,6 | 11,4 | 11,2 |
| 310 | 150 | 21,2 | 22,4 | 22,6 | 21,8 | 19,9 | 17,3 | 14,4 | 12,1 | 10,8 | 10,6 |
| 310 | 160 | 19,5 | 20,7 | 21,1 | 20,5 | 18,9 | 16,4 | 13,6 | 11,3 | 10,1 | 9,8  |
| 310 | 170 | 18,0 | 19,3 | 19,8 | 19,4 | 17,9 | 15,6 | 13,0 | 10,7 | 9,4  | 9,1  |
| 310 | 180 | 17,1 | 18,4 | 19,0 | 18,7 | 17,4 | 15,2 | 12,7 | 10,5 | 9,2  | 8,8  |
| 310 | 190 | 16,7 | 18,0 | 18,6 | 18,5 | 17,3 | 15,3 | 12,9 | 10,7 | 9,4  | 9,0  |
| 310 | 200 | 16,8 | 18,1 | 18,8 | 18,8 | 17,8 | 15,9 | 13,5 | 11,4 | 10,1 | 9,7  |

|     |     |      |      |      |      |      |      |      |      |      |      |     |     |      |      |      |      |      |      |      |      |      |      |
|-----|-----|------|------|------|------|------|------|------|------|------|------|-----|-----|------|------|------|------|------|------|------|------|------|------|
| 130 | 210 | 27,2 | 26,6 | 25,1 | 23,4 | 21,8 | 20,7 | 20,0 | 19,3 | 18,7 | 18,3 | 310 | 210 | 17,3 | 18,6 | 19,4 | 19,4 | 18,5 | 16,7 | 14,5 | 12,4 | 11,1 | 10,7 |
| 130 | 220 | 28,5 | 27,9 | 26,4 | 24,7 | 23,0 | 21,9 | 21,1 | 20,4 | 19,9 | 19,5 | 310 | 220 | 17,9 | 19,2 | 20,1 | 20,2 | 19,4 | 17,6 | 15,4 | 13,4 | 12,1 | 11,7 |
| 130 | 230 | 29,4 | 28,7 | 27,3 | 25,5 | 23,8 | 22,6 | 21,9 | 21,1 | 20,6 | 20,3 | 310 | 230 | 18,4 | 19,7 | 20,6 | 20,7 | 19,9 | 18,3 | 16,1 | 14,1 | 12,8 | 12,4 |
| 130 | 240 | 29,6 | 29,0 | 27,5 | 25,7 | 24,0 | 22,8 | 22,0 | 21,3 | 20,8 | 20,6 | 310 | 240 | 18,5 | 19,8 | 20,7 | 20,8 | 20,1 | 18,5 | 16,4 | 14,4 | 13,1 | 12,7 |
| 130 | 250 | 29,3 | 28,7 | 27,2 | 25,4 | 23,6 | 22,3 | 21,6 | 20,9 | 20,5 | 20,3 | 310 | 250 | 18,1 | 19,4 | 20,3 | 20,4 | 19,7 | 18,1 | 16,1 | 14,1 | 12,8 | 12,4 |
| 130 | 260 | 28,5 | 27,9 | 26,4 | 24,6 | 22,8 | 21,5 | 20,7 | 20,1 | 19,8 | 19,6 | 310 | 260 | 17,3 | 18,5 | 19,4 | 19,5 | 18,9 | 17,4 | 15,5 | 13,5 | 12,2 | 11,7 |
| 130 | 270 | 27,5 | 26,9 | 25,4 | 23,5 | 21,7 | 20,5 | 19,7 | 19,1 | 18,8 | 18,7 | 310 | 270 | 16,2 | 17,4 | 18,2 | 18,5 | 18,0 | 16,6 | 14,7 | 12,8 | 11,4 | 10,8 |
| 130 | 280 | 26,6 | 26,0 | 24,5 | 22,6 | 20,8 | 19,6 | 18,9 | 18,3 | 18,1 | 18,0 | 310 | 280 | 15,1 | 16,3 | 17,2 | 17,6 | 17,3 | 16,1 | 14,2 | 12,2 | 10,7 | 10,0 |
| 130 | 290 | 26,2 | 25,6 | 24,1 | 22,2 | 20,4 | 19,1 | 18,5 | 18,0 | 17,8 | 17,7 | 310 | 290 | 14,2 | 15,6 | 16,6 | 17,2 | 17,1 | 16,0 | 14,2 | 12,1 | 10,4 | 9,5  |
| 130 | 300 | 26,4 | 25,8 | 24,3 | 22,4 | 20,6 | 19,4 | 18,8 | 18,3 | 18,1 | 18,0 | 310 | 300 | 13,9 | 15,4 | 16,6 | 17,5 | 17,7 | 16,9 | 15,1 | 12,7 | 10,7 | 9,6  |
| 130 | 310 | 27,3 | 26,7 | 25,2 | 23,3 | 21,6 | 20,3 | 19,8 | 19,3 | 19,1 | 19,0 | 310 | 310 | 14,2 | 15,9 | 17,4 | 18,7 | 19,3 | 18,6 | 16,8 | 14,0 | 11,6 | 10,2 |
| 130 | 320 | 28,7 | 28,1 | 26,6 | 24,8 | 23,0 | 21,9 | 21,3 | 20,9 | 20,6 | 20,5 | 310 | 320 | 15,0 | 17,0 | 19,1 | 20,9 | 21,8 | 21,3 | 19,1 | 15,9 | 13,0 | 11,1 |
| 130 | 330 | 30,3 | 29,7 | 28,3 | 26,4 | 24,8 | 23,6 | 23,1 | 22,6 | 22,3 | 22,1 | 310 | 330 | 16,3 | 18,7 | 21,4 | 23,8 | 25,0 | 24,4 | 21,7 | 17,8 | 14,3 | 12,1 |
| 130 | 340 | 31,6 | 31,1 | 29,7 | 27,9 | 26,3 | 25,2 | 24,7 | 24,2 | 23,7 | 23,5 | 310 | 340 | 17,7 | 20,7 | 24,1 | 27,0 | 28,5 | 27,6 | 24,0 | 19,2 | 15,2 | 12,8 |
| 130 | 350 | 32,5 | 32,0 | 30,7 | 29,0 | 27,4 | 26,3 | 25,8 | 25,2 | 24,7 | 24,3 | 310 | 350 | 19,1 | 22,8 | 26,9 | 30,3 | 31,8 | 30,2 | 25,4 | 19,7 | 15,3 | 12,6 |
| 130 | 360 | 32,7 | 32,3 | 30,9 | 29,3 | 27,8 | 26,7 | 26,1 | 25,5 | 24,9 | 24,5 | 310 | 360 | 20,2 | 24,8 | 29,5 | 33,2 | 34,3 | 31,5 | 25,3 | 18,9 | 14,3 | 11,6 |
| 140 | 0   | 29,4 | 28,5 | 27,1 | 25,7 | 24,4 | 23,6 | 22,9 | 22,2 | 21,6 | 21,1 | 320 | 0   | 30,0 | 35,8 | 40,9 | 43,5 | 41,8 | 35,4 | 27,3 | 20,5 | 16,1 | 13,7 |
| 140 | 10  | 28,8 | 27,9 | 26,6 | 25,2 | 24,0 | 23,1 | 22,4 | 21,6 | 21,0 | 20,5 | 320 | 10  | 31,7 | 38,2 | 43,3 | 44,8 | 41,4 | 33,6 | 25,0 | 18,4 | 14,2 | 12,1 |
| 140 | 20  | 27,6 | 26,7 | 25,4 | 24,0 | 22,9 | 22,0 | 21,2 | 20,4 | 19,8 | 19,2 | 320 | 20  | 33,2 | 40,0 | 44,5 | 44,4 | 39,1 | 30,5 | 22,0 | 15,7 | 11,9 | 10,3 |
| 140 | 30  | 25,9 | 25,1 | 23,8 | 22,4 | 21,3 | 20,4 | 19,6 | 18,8 | 18,1 | 17,5 | 320 | 30  | 34,4 | 41,0 | 44,1 | 42,4 | 35,7 | 26,9 | 18,9 | 13,0 | 9,8  | 8,5  |
| 140 | 40  | 24,2 | 23,3 | 22,0 | 20,7 | 19,6 | 18,6 | 17,8 | 16,9 | 16,2 | 15,7 | 320 | 40  | 35,3 | 41,1 | 42,6 | 39,3 | 31,8 | 23,4 | 16,0 | 10,8 | 8,2  | 7,3  |
| 140 | 50  | 22,7 | 21,8 | 20,5 | 19,2 | 18,1 | 17,1 | 16,3 | 15,4 | 14,7 | 14,2 | 320 | 50  | 35,8 | 40,3 | 40,3 | 35,8 | 28,4 | 20,6 | 14,0 | 9,5  | 7,3  | 6,7  |
| 140 | 60  | 21,8 | 20,9 | 19,6 | 18,3 | 17,1 | 16,2 | 15,3 | 14,4 | 13,7 | 13,2 | 320 | 60  | 35,9 | 38,8 | 37,7 | 32,9 | 26,0 | 18,9 | 13,0 | 9,1  | 7,3  | 6,9  |
| 140 | 70  | 21,6 | 20,7 | 19,3 | 18,0 | 16,9 | 15,9 | 15,0 | 14,1 | 13,4 | 12,9 | 320 | 70  | 35,5 | 37,3 | 35,6 | 30,8 | 24,6 | 18,3 | 13,1 | 9,7  | 8,2  | 7,9  |
| 140 | 80  | 22,1 | 21,1 | 19,7 | 18,4 | 17,2 | 16,2 | 15,4 | 14,5 | 13,8 | 13,3 | 320 | 80  | 35,0 | 36,0 | 34,1 | 29,8 | 24,3 | 18,7 | 14,1 | 11,1 | 9,7  | 9,5  |
| 140 | 90  | 22,9 | 21,9 | 20,5 | 19,2 | 18,0 | 17,0 | 16,1 | 15,3 | 14,6 | 14,1 | 320 | 90  | 34,6 | 35,2 | 33,4 | 29,6 | 24,7 | 19,8 | 15,7 | 12,9 | 11,6 | 11,5 |
| 140 | 100 | 23,9 | 22,8 | 21,4 | 20,1 | 18,8 | 17,9 | 17,1 | 16,3 | 15,6 | 15,0 | 320 | 100 | 34,2 | 34,7 | 33,1 | 29,9 | 25,7 | 21,3 | 17,4 | 14,8 | 13,6 | 13,4 |
| 140 | 110 | 24,6 | 23,6 | 22,2 | 20,7 | 19,5 | 18,6 | 17,8 | 17,0 | 16,3 | 15,8 | 320 | 110 | 33,8 | 34,3 | 33,1 | 30,4 | 26,7 | 22,6 | 19,0 | 16,4 | 15,3 | 15,1 |
| 140 | 120 | 24,8 | 23,8 | 22,4 | 21,0 | 19,8 | 18,8 | 18,1 | 17,4 | 16,7 | 16,1 | 320 | 120 | 33,1 | 33,7 | 32,8 | 30,6 | 27,3 | 23,6 | 20,0 | 17,5 | 16,4 | 16,2 |
| 140 | 130 | 24,6 | 23,6 | 22,1 | 20,7 | 19,5 | 18,6 | 17,9 | 17,2 | 16,5 | 16,0 | 320 | 130 | 32,0 | 32,8 | 32,2 | 30,4 | 27,4 | 23,9 | 20,5 | 18,0 | 16,9 | 16,7 |
| 140 | 140 | 23,8 | 22,8 | 21,4 | 20,0 | 18,8 | 17,9 | 17,2 | 16,5 | 15,8 | 15,3 | 320 | 140 | 30,6 | 31,5 | 31,2 | 29,7 | 27,0 | 23,7 | 20,3 | 17,8 | 16,7 | 16,5 |
| 140 | 150 | 22,7 | 21,7 | 20,3 | 18,9 | 17,7 | 16,8 | 16,2 | 15,5 | 14,8 | 14,3 | 320 | 150 | 28,9 | 30,1 | 30,0 | 28,6 | 26,2 | 23,0 | 19,7 | 17,2 | 16,0 | 15,8 |
| 140 | 160 | 21,7 | 20,7 | 19,3 | 18,0 | 16,7 | 15,9 | 15,2 | 14,5 | 13,9 | 13,4 | 320 | 160 | 27,3 | 28,5 | 28,6 | 27,5 | 25,2 | 22,0 | 18,8 | 16,4 | 15,2 | 14,9 |
| 140 | 170 | 21,0 | 20,1 | 18,7 | 17,3 | 16,1 | 15,3 | 14,6 | 13,9 | 13,3 | 12,8 | 320 | 170 | 25,8 | 27,1 | 27,3 | 26,4 | 24,3 | 21,3 | 18,1 | 15,7 | 14,4 | 14,0 |
| 140 | 180 | 20,9 | 20,0 | 18,7 | 17,3 | 16,1 | 15,2 | 14,6 | 13,9 | 13,3 | 12,8 | 320 | 180 | 24,7 | 26,1 | 26,4 | 25,7 | 23,7 | 20,8 | 17,7 | 15,3 | 14,0 | 13,6 |
| 140 | 190 | 21,6 | 20,7 | 19,3 | 18,0 | 16,8 | 15,9 | 15,2 | 14,5 | 13,9 | 13,5 | 320 | 190 | 24,2 | 25,6 | 26,1 | 25,5 | 23,7 | 20,9 | 17,9 | 15,4 | 14,1 | 13,6 |
| 140 | 200 | 22,9 | 22,0 | 20,6 | 19,2 | 18,0 | 17,1 | 16,4 | 15,7 | 15,1 | 14,7 | 320 | 200 | 24,2 | 25,7 | 26,3 | 25,8 | 24,1 | 21,5 | 18,5 | 16,1 | 14,7 | 14,2 |
| 140 | 210 | 24,5 | 23,5 | 22,1 | 20,6 | 19,3 | 18,4 | 17,7 | 17,0 | 16,4 | 16,1 | 320 | 210 | 24,6 | 26,2 | 26,9 | 26,5 | 24,9 | 22,4 | 19,4 | 17,0 | 15,6 | 15,1 |
| 140 | 220 | 25,9 | 24,9 | 23,4 | 21,9 | 20,6 | 19,7 | 19,0 | 18,2 | 17,6 | 17,3 | 320 | 220 | 25,2 | 26,8 | 27,6 | 27,2 | 25,8 | 23,3 | 20,4 | 18,0 | 16,6 | 16,1 |
| 140 | 230 | 26,9 | 25,9 | 24,4 | 22,8 | 21,5 | 20,5 | 19,8 | 19,0 | 18,5 | 18,2 | 320 | 230 | 25,5 | 27,2 | 28,0 | 27,7 | 26,3 | 23,9 | 21,1 | 18,7 | 17,3 | 16,7 |
| 140 | 240 | 27,2 | 26,3 | 24,8 | 23,2 | 21,8 | 20,8 | 20,0 | 19,3 | 18,7 | 18,5 | 320 | 240 | 25,5 | 27,2 | 28,0 | 27,7 | 26,4 | 24,1 | 21,3 | 18,9 | 17,5 | 16,9 |
| 140 | 250 | 27,0 | 26,0 | 24,5 | 22,9 | 21,5 | 20,4 | 19,7 | 18,9 | 18,5 | 18,2 | 320 | 250 | 25,0 | 26,6 | 27,4 | 27,2 | 26,0 | 23,8 | 21,1 | 18,6 | 17,2 | 16,6 |
| 140 | 260 | 26,3 | 25,3 | 23,8 | 22,1 | 20,7 | 19,6 | 18,8 | 18,2 | 17,7 | 17,5 | 320 | 260 | 23,9 | 25,5 | 26,4 | 26,3 | 25,2 | 23,1 | 20,5 | 18,0 | 16,5 | 15,8 |
| 140 | 270 | 25,3 | 24,3 | 22,8 | 21,1 | 19,6 | 18,5 | 17,8 | 17,2 | 16,8 | 16,6 | 320 | 270 | 22,7 | 24,3 | 25,2 | 25,3 | 24,4 | 22,4 | 19,8 | 17,3 | 15,6 | 14,8 |
| 140 | 280 | 24,4 | 23,5 | 21,9 | 20,2 | 18,7 | 17,6 | 16,9 | 16,3 | 16,0 | 15,8 | 320 | 280 | 21,5 | 23,2 | 24,3 | 24,6 | 23,9 | 22,1 | 19,4 | 16,7 | 14,8 | 13,8 |
| 140 | 290 | 23,9 | 22,9 | 21,4 | 19,6 | 18,1 | 17,1 | 16,4 | 15,8 | 15,5 | 15,4 | 320 | 290 | 20,7 | 22,5 | 23,8 | 24,5 | 24,1 | 22,3 | 19,6 | 16,6 | 14,4 | 13,2 |
| 140 | 300 | 24,0 | 23,1 | 21,4 | 19,7 | 18,2 | 17,2 | 16,6 | 16,0 | 15,7 | 15,5 | 320 | 300 | 20,4 | 22,5 | 24,2 | 25,2 | 25,1 | 23,5 | 20,6 | 17,2 | 14,6 | 13,1 |
| 140 | 310 | 24,8 | 23,8 | 22,2 | 20,5 | 19,0 | 18,0 | 17,4 | 16,9 | 16,5 | 16,3 | 320 | 310 | 20,9 | 23,3 | 25,5 | 27,0 | 27,2 | 25,6 | 22,3 | 18,3 | 15,3 | 13,5 |
| 140 | 320 | 25,9 | 25,0 | 23,4 | 21,7 | 20,3 | 19,4 | 18,8 | 18,2 | 17,8 | 17,5 | 320 | 320 | 22,0 | 25,0 | 27,8 | 29,8 | 30,2 | 28,4 | 24,4 | 19,8 | 16,3 | 14,2 |
| 140 | 330 | 27,3 | 26,4 | 24,8 | 23,2 | 21,8 | 20,9 | 20,3 | 19,7 | 19,2 | 18,9 | 320 | 330 | 23,8 | 27,3 | 30,8 | 33,3 | 33,8 | 31,5 | 26,5 | 21,2 | 17,2 | 14,9 |
| 140 | 340 | 28,5 | 27,6 | 26,1 | 24,5 | 23,2 | 22,3 | 21,7 | 21,1 | 20,5 | 20,1 | 320 | 340 | 25,8 | 30,1 | 34,2 | 37,1 | 37,4 | 34,2 | 28,0 | 21,9 | 17,6 | 15,2 |
| 140 | 350 | 29,3 | 28,4 | 26,9 | 25,4 | 24,2 | 23,3 | 22,6 | 22,0 | 21,4 | 20,9 | 320 | 350 | 27,9 | 33,1 | 37,8 | 40,7 | 40,3 | 35,6 | 28,3 | 21,7 | 17,3 | 14,8 |
| 140 | 360 | 29,4 | 28,5 | 27,1 | 25,7 | 24,4 | 23,6 | 22,9 | 22,2 | 21,6 | 21,1 | 320 | 360 | 30,0 | 35,8 | 40,9 | 43,5 | 41,8 | 35,4 | 27,3 | 20,5 | 16,1 | 13,7 |
| 150 | 0   | 24,6 | 23,6 | 22,4 | 21,3 | 20,4 | 19,6 | 18,7 | 17,9 | 17,2 | 16,7 | 330 | 0   | 42,0 | 48,4 | 52,4 | 51,9 | 46,2 | 37,2 | 28,7 | 22,5 | 18,8 | 17,2 |
| 150 | 10  | 24,0 | 23,0 | 21,9 | 20,8 | 20,0 | 19,1 | 18,3 | 17,4 | 16,7 | 16,2 | 330 | 10  | 44,5 | 50,9 | 53,7 | 51,5 | 44,1 | 34,6 | 26,4 | 20,5 | 17,3 | 16,0 |
| 150 | 20  | 22,8 | 21,8 | 20,7 | 19,8 | 18,9 | 18,0 | 17,1 | 16,2 | 15,5 | 15,0 | 330 | 20  | 46,4 | 52,1 | 53,3 | 49,2 | 40,7 | 31,4 | 23,6 | 18,3 | 15,6 | 14,7 |

|     |     |      |      |      |      |      |      |      |      |      |      |     |     |      |      |      |      |      |      |      |      |      |      |
|-----|-----|------|------|------|------|------|------|------|------|------|------|-----|-----|------|------|------|------|------|------|------|------|------|------|
| 150 | 30  | 21,2 | 20,2 | 19,1 | 18,2 | 17,4 | 16,5 | 15,5 | 14,6 | 13,9 | 13,4 | 330 | 30  | 47,5 | 51,8 | 51,3 | 45,6 | 36,8 | 28,0 | 20,9 | 16,3 | 14,1 | 13,5 |
| 150 | 40  | 19,5 | 18,5 | 17,5 | 16,6 | 15,7 | 14,8 | 13,8 | 12,8 | 12,1 | 11,6 | 330 | 40  | 47,6 | 49,2 | 48,1 | 41,6 | 33,2 | 25,1 | 18,7 | 14,8 | 13,0 | 12,6 |
| 150 | 50  | 18,1 | 17,1 | 16,1 | 15,2 | 14,3 | 13,4 | 12,3 | 11,4 | 10,7 | 10,2 | 330 | 50  | 46,8 | 47,0 | 44,6 | 38,0 | 30,2 | 23,0 | 17,3 | 14,0 | 12,5 | 12,3 |
| 150 | 60  | 17,2 | 16,3 | 15,3 | 14,3 | 13,5 | 12,5 | 11,5 | 10,5 | 9,8  | 9,3  | 330 | 60  | 45,2 | 45,2 | 41,5 | 35,4 | 28,4 | 21,9 | 16,9 | 14,0 | 12,8 | 12,6 |
| 150 | 70  | 17,1 | 16,1 | 15,1 | 14,2 | 13,3 | 12,3 | 11,3 | 10,3 | 9,6  | 9,1  | 330 | 70  | 43,7 | 43,0 | 39,5 | 33,9 | 27,7 | 21,9 | 17,5 | 14,9 | 13,8 | 13,7 |
| 150 | 80  | 17,6 | 16,6 | 15,5 | 14,6 | 13,7 | 12,7 | 11,7 | 10,7 | 10,0 | 9,5  | 330 | 80  | 42,4 | 41,6 | 38,4 | 33,5 | 28,0 | 22,9 | 18,9 | 16,4 | 15,4 | 15,4 |
| 150 | 90  | 18,4 | 17,4 | 16,3 | 15,3 | 14,5 | 13,5 | 12,5 | 11,5 | 10,8 | 10,3 | 330 | 90  | 41,7 | 40,9 | 38,1 | 33,9 | 29,1 | 24,5 | 20,7 | 18,4 | 17,4 | 17,4 |
| 150 | 100 | 19,4 | 18,3 | 17,2 | 16,2 | 15,3 | 14,4 | 13,4 | 12,5 | 11,7 | 11,2 | 330 | 100 | 41,3 | 40,8 | 38,5 | 34,8 | 30,6 | 26,2 | 22,6 | 20,4 | 19,5 | 19,4 |
| 150 | 110 | 20,1 | 19,0 | 17,9 | 16,9 | 16,0 | 15,1 | 14,1 | 13,2 | 12,5 | 11,9 | 330 | 110 | 41,0 | 40,8 | 38,9 | 35,8 | 31,9 | 27,8 | 24,3 | 22,1 | 21,2 | 21,2 |
| 150 | 120 | 20,3 | 19,3 | 18,1 | 17,1 | 16,2 | 15,3 | 14,4 | 13,5 | 12,8 | 12,3 | 330 | 120 | 40,6 | 40,6 | 39,2 | 36,5 | 32,9 | 28,9 | 25,4 | 23,2 | 22,4 | 22,3 |
| 150 | 130 | 20,0 | 19,0 | 17,8 | 16,8 | 15,9 | 15,1 | 14,2 | 13,3 | 12,6 | 12,1 | 330 | 130 | 39,8 | 40,1 | 39,0 | 36,6 | 33,2 | 29,3 | 25,9 | 23,7 | 22,8 | 22,7 |
| 150 | 140 | 19,3 | 18,2 | 17,1 | 16,0 | 15,2 | 14,3 | 13,5 | 12,7 | 12,0 | 11,5 | 330 | 140 | 38,6 | 39,1 | 38,3 | 36,2 | 32,9 | 29,1 | 25,7 | 23,5 | 22,6 | 22,4 |
| 150 | 150 | 18,3 | 17,2 | 16,1 | 15,1 | 14,2 | 13,4 | 12,5 | 11,7 | 11,0 | 10,5 | 330 | 150 | 37,1 | 37,9 | 37,2 | 35,3 | 32,2 | 28,4 | 25,1 | 22,9 | 21,9 | 21,7 |
| 150 | 160 | 17,3 | 16,3 | 15,1 | 14,1 | 13,3 | 12,5 | 11,6 | 10,8 | 10,2 | 9,7  | 330 | 160 | 35,6 | 36,5 | 36,0 | 34,2 | 31,2 | 27,6 | 24,2 | 22,0 | 20,9 | 20,7 |
| 150 | 170 | 16,7 | 15,7 | 14,6 | 13,6 | 12,7 | 11,9 | 11,1 | 10,3 | 9,7  | 9,2  | 330 | 170 | 34,1 | 35,1 | 34,8 | 33,2 | 30,3 | 26,8 | 23,4 | 21,1 | 20,0 | 19,7 |
| 150 | 180 | 16,7 | 15,7 | 14,6 | 13,6 | 12,7 | 12,0 | 11,1 | 10,4 | 9,7  | 9,3  | 330 | 180 | 33,1 | 34,2 | 34,0 | 32,6 | 29,9 | 26,4 | 23,1 | 20,7 | 19,5 | 19,2 |
| 150 | 190 | 17,5 | 16,4 | 15,3 | 14,3 | 13,4 | 12,6 | 11,8 | 11,0 | 10,4 | 10,0 | 330 | 190 | 32,6 | 33,8 | 33,8 | 32,5 | 29,9 | 26,6 | 23,2 | 20,8 | 19,6 | 19,2 |
| 150 | 200 | 18,8 | 17,7 | 16,5 | 15,5 | 14,6 | 13,8 | 13,0 | 12,2 | 11,6 | 11,2 | 330 | 200 | 32,7 | 34,0 | 34,1 | 33,0 | 30,5 | 27,2 | 23,9 | 21,5 | 20,2 | 19,8 |
| 150 | 210 | 20,3 | 19,2 | 18,0 | 16,9 | 16,0 | 15,2 | 14,3 | 13,6 | 12,9 | 12,6 | 330 | 210 | 33,1 | 34,6 | 34,8 | 33,7 | 31,4 | 28,2 | 24,9 | 22,4 | 21,1 | 20,7 |
| 150 | 220 | 21,8 | 20,7 | 19,4 | 18,3 | 17,3 | 16,4 | 15,6 | 14,8 | 14,2 | 13,9 | 330 | 220 | 33,7 | 35,2 | 35,5 | 34,5 | 32,3 | 29,1 | 25,9 | 23,4 | 22,0 | 21,6 |
| 150 | 230 | 22,8 | 21,7 | 20,4 | 19,2 | 18,2 | 17,3 | 16,4 | 15,6 | 15,1 | 14,8 | 330 | 230 | 34,0 | 35,5 | 35,9 | 35,0 | 32,9 | 29,8 | 26,6 | 24,1 | 22,7 | 22,2 |
| 150 | 240 | 23,2 | 22,1 | 20,8 | 19,6 | 18,6 | 17,6 | 16,7 | 15,9 | 15,4 | 15,1 | 330 | 240 | 33,8 | 35,4 | 35,8 | 35,0 | 33,0 | 30,0 | 26,8 | 24,2 | 22,8 | 22,3 |
| 150 | 250 | 23,1 | 21,9 | 20,6 | 19,3 | 18,3 | 17,3 | 16,4 | 15,6 | 15,1 | 14,8 | 330 | 250 | 33,1 | 34,6 | 35,1 | 34,4 | 32,6 | 29,7 | 26,5 | 23,9 | 22,4 | 21,8 |
| 150 | 260 | 22,4 | 21,3 | 19,9 | 18,6 | 17,5 | 16,5 | 15,6 | 14,9 | 14,4 | 14,1 | 330 | 260 | 31,9 | 33,5 | 34,1 | 33,6 | 31,9 | 29,1 | 25,9 | 23,2 | 21,5 | 20,8 |
| 150 | 270 | 21,5 | 20,3 | 18,9 | 17,6 | 16,4 | 15,5 | 14,6 | 13,9 | 13,4 | 13,2 | 330 | 270 | 30,5 | 32,2 | 33,0 | 32,8 | 31,3 | 28,6 | 25,3 | 22,4 | 20,5 | 19,6 |
| 150 | 280 | 20,6 | 19,4 | 18,0 | 16,6 | 15,5 | 14,5 | 13,7 | 13,0 | 12,5 | 12,2 | 330 | 280 | 29,3 | 31,2 | 32,3 | 32,3 | 31,0 | 28,4 | 24,9 | 21,7 | 19,6 | 18,5 |
| 150 | 290 | 20,0 | 18,8 | 17,4 | 16,0 | 14,8 | 13,9 | 13,1 | 12,4 | 12,0 | 11,7 | 330 | 290 | 28,6 | 30,7 | 32,2 | 32,5 | 31,5 | 28,9 | 25,1 | 21,5 | 19,0 | 17,7 |
| 150 | 300 | 19,9 | 18,8 | 17,3 | 16,0 | 14,8 | 13,9 | 13,1 | 12,4 | 12,0 | 11,7 | 330 | 300 | 28,5 | 31,1 | 33,0 | 33,8 | 33,0 | 30,2 | 25,9 | 21,8 | 18,9 | 17,3 |
| 150 | 310 | 20,5 | 19,3 | 17,9 | 16,6 | 15,5 | 14,6 | 13,8 | 13,1 | 12,6 | 12,3 | 330 | 310 | 29,3 | 32,4 | 34,9 | 36,1 | 35,4 | 32,3 | 27,3 | 22,6 | 19,2 | 17,4 |
| 150 | 320 | 21,5 | 20,4 | 19,0 | 17,6 | 16,6 | 15,7 | 15,0 | 14,3 | 13,7 | 13,3 | 330 | 320 | 31,0 | 34,7 | 37,9 | 39,4 | 38,6 | 34,8 | 28,8 | 23,5 | 19,8 | 17,8 |
| 150 | 330 | 22,7 | 21,6 | 20,3 | 19,0 | 18,0 | 17,1 | 16,3 | 15,6 | 15,0 | 14,6 | 330 | 330 | 33,4 | 37,8 | 41,5 | 43,3 | 42,1 | 37,1 | 30,1 | 24,2 | 20,3 | 18,3 |
| 150 | 340 | 23,8 | 22,7 | 21,4 | 20,2 | 19,2 | 18,4 | 17,6 | 16,9 | 16,2 | 15,8 | 330 | 340 | 36,2 | 41,4 | 45,6 | 47,2 | 45,0 | 38,5 | 30,7 | 24,4 | 20,4 | 18,4 |
| 150 | 350 | 24,5 | 23,4 | 22,2 | 21,1 | 20,1 | 19,3 | 18,5 | 17,7 | 17,0 | 16,6 | 330 | 350 | 39,2 | 45,1 | 49,4 | 50,3 | 46,5 | 38,6 | 30,2 | 23,8 | 20,0 | 18,0 |
| 150 | 360 | 24,6 | 23,6 | 22,4 | 21,3 | 20,4 | 19,6 | 18,7 | 17,9 | 17,2 | 16,7 | 330 | 360 | 42,0 | 48,4 | 52,4 | 51,9 | 46,2 | 37,2 | 28,7 | 22,5 | 18,8 | 17,2 |
| 160 | 0   | 19,8 | 18,9 | 18,1 | 17,5 | 16,8 | 15,9 | 14,8 | 13,8 | 13,1 | 12,7 | 340 | 0   | 54,4 | 59,6 | 60,3 | 55,7 | 46,6 | 37,1 | 29,4 | 24,5 | 22,0 | 21,1 |
| 160 | 10  | 19,2 | 18,4 | 17,7 | 17,1 | 16,4 | 15,5 | 14,3 | 13,4 | 12,6 | 12,2 | 340 | 10  | 56,9 | 60,9 | 59,9 | 53,4 | 43,8 | 34,6 | 27,4 | 23,0 | 21,0 | 20,4 |
| 160 | 20  | 18,1 | 17,3 | 16,6 | 16,1 | 15,3 | 14,4 | 13,2 | 12,2 | 11,5 | 11,1 | 340 | 20  | 58,2 | 60,3 | 57,5 | 49,8 | 40,3 | 31,7 | 25,2 | 21,5 | 19,9 | 19,5 |
| 160 | 30  | 16,5 | 15,8 | 15,2 | 14,6 | 13,9 | 12,9 | 11,7 | 10,7 | 9,9  | 9,5  | 340 | 30  | 57,8 | 58,2 | 53,7 | 45,7 | 36,8 | 28,9 | 23,2 | 20,1 | 18,8 | 18,6 |
| 160 | 40  | 15,0 | 14,2 | 13,7 | 13,1 | 12,4 | 11,4 | 10,1 | 9,0  | 8,3  | 7,9  | 340 | 40  | 54,5 | 54,9 | 49,6 | 41,9 | 33,8 | 26,7 | 21,7 | 19,1 | 18,0 | 17,9 |
| 160 | 50  | 13,7 | 13,0 | 12,4 | 11,9 | 11,1 | 10,1 | 8,8  | 7,7  | 7,0  | 6,6  | 340 | 50  | 50,9 | 51,3 | 45,9 | 38,8 | 31,5 | 25,3 | 20,9 | 18,6 | 17,7 | 17,6 |
| 160 | 60  | 13,0 | 12,3 | 11,7 | 11,2 | 10,4 | 9,3  | 8,1  | 7,0  | 6,2  | 5,8  | 340 | 60  | 50,7 | 48,2 | 43,2 | 36,9 | 30,4 | 24,8 | 20,9 | 18,9 | 18,1 | 18,1 |
| 160 | 70  | 12,9 | 12,2 | 11,7 | 11,1 | 10,3 | 9,2  | 7,9  | 6,9  | 6,1  | 5,6  | 340 | 70  | 48,5 | 46,1 | 41,7 | 36,1 | 30,4 | 25,4 | 21,8 | 19,9 | 19,2 | 19,2 |
| 160 | 80  | 13,5 | 12,7 | 12,1 | 11,6 | 10,8 | 9,7  | 8,4  | 7,3  | 6,5  | 6,1  | 340 | 80  | 47,2 | 45,1 | 41,2 | 36,3 | 31,2 | 26,7 | 23,3 | 21,5 | 20,8 | 20,9 |
| 160 | 90  | 14,4 | 13,6 | 13,0 | 12,4 | 11,6 | 10,5 | 9,3  | 8,2  | 7,4  | 6,9  | 340 | 90  | 46,6 | 44,9 | 41,6 | 37,4 | 32,8 | 28,4 | 25,2 | 23,5 | 22,8 | 22,9 |
| 160 | 100 | 15,3 | 14,5 | 13,8 | 13,2 | 12,5 | 11,4 | 10,2 | 9,1  | 8,3  | 7,9  | 340 | 100 | 46,6 | 45,3 | 42,5 | 38,7 | 34,5 | 30,3 | 27,1 | 25,5 | 24,9 | 24,9 |
| 160 | 110 | 16,0 | 15,1 | 14,4 | 13,9 | 13,1 | 12,1 | 10,9 | 9,9  | 9,1  | 8,6  | 340 | 110 | 46,7 | 45,8 | 43,5 | 40,1 | 36,1 | 32,0 | 28,8 | 27,2 | 26,6 | 26,6 |
| 160 | 120 | 16,2 | 15,4 | 14,6 | 14,0 | 13,3 | 12,4 | 11,2 | 10,2 | 9,4  | 8,9  | 340 | 120 | 46,6 | 46,1 | 44,1 | 41,1 | 37,2 | 33,2 | 30,0 | 28,4 | 27,7 | 27,7 |
| 160 | 130 | 15,9 | 15,1 | 14,3 | 13,7 | 13,0 | 12,1 | 11,0 | 10,0 | 9,2  | 8,8  | 340 | 130 | 46,2 | 46,0 | 44,3 | 41,4 | 37,6 | 33,6 | 30,5 | 28,8 | 28,2 | 28,1 |
| 160 | 140 | 15,2 | 14,3 | 13,5 | 12,9 | 12,3 | 11,4 | 10,3 | 9,3  | 8,6  | 8,1  | 340 | 140 | 45,3 | 45,3 | 43,9 | 41,1 | 37,4 | 33,5 | 30,4 | 28,6 | 27,9 | 27,8 |
| 160 | 150 | 14,2 | 13,3 | 12,5 | 11,9 | 11,3 | 10,4 | 9,3  | 8,4  | 7,7  | 7,2  | 340 | 150 | 44,1 | 44,3 | 43,1 | 40,4 | 36,7 | 32,8 | 29,7 | 27,9 | 27,1 | 27,0 |
| 160 | 160 | 13,2 | 12,3 | 11,6 | 11,0 | 10,3 | 9,5  | 8,4  | 7,5  | 6,8  | 6,3  | 340 | 160 | 42,7 | 43,1 | 41,9 | 39,4 | 35,8 | 31,9 | 28,8 | 26,9 | 26,1 | 25,9 |
| 160 | 170 | 12,5 | 11,7 | 11,0 | 10,4 | 9,7  | 8,9  | 7,9  | 6,9  | 6,3  | 5,8  | 340 | 170 | 41,5 | 41,9 | 40,9 | 38,6 | 35,1 | 31,2 | 28,1 | 26,1 | 25,2 | 25,0 |
| 160 | 180 | 12,5 | 11,7 | 10,9 | 10,4 | 9,7  | 8,9  | 7,9  | 6,9  | 6,3  | 5,9  | 340 | 180 | 40,6 | 41,1 | 40,3 | 38,1 | 34,8 | 31,0 | 27,7 | 25,7 | 24,7 | 24,5 |
| 160 | 190 | 13,2 | 12,3 | 11,5 | 11,0 | 10,3 | 9,5  | 8,4  | 7,5  | 6,9  | 6,6  | 340 | 190 | 40,2 | 41,0 | 40,3 | 38,3 | 35,1 | 31,3 | 28,0 | 25,9 | 24,9 | 24,5 |
| 160 | 200 | 14,4 | 13,5 | 12,7 | 12,1 | 11,4 | 10,6 | 9,5  | 8,6  | 8,0  | 7,7  | 340 | 200 | 40,5 | 41,4 | 40,9 | 38,9 | 35,8 | 32,1 | 28,7 | 26,6 | 25,5 | 25,1 |
| 160 | 210 | 15,9 | 15,0 | 14,2 | 13,5 | 12,8 | 11,9 | 10,8 | 9,9  | 9,3  | 9,0  | 340 | 210 | 41,1 | 42,1 | 41,7 | 39,9 | 36,8 | 33,1 | 29,8 | 27,6 | 26,4 | 26,0 |

|     |     |      |      |      |      |      |      |      |      |      |      |     |     |      |      |      |      |      |      |      |      |      |      |
|-----|-----|------|------|------|------|------|------|------|------|------|------|-----|-----|------|------|------|------|------|------|------|------|------|------|
| 160 | 220 | 17,3 | 16,3 | 15,5 | 14,8 | 14,0 | 13,1 | 12,0 | 11,1 | 10,5 | 10,2 | 340 | 220 | 41,7 | 42,8 | 42,4 | 40,7 | 37,8 | 34,1 | 30,8 | 28,5 | 27,4 | 26,9 |
| 160 | 230 | 18,3 | 17,3 | 16,5 | 15,7 | 14,9 | 13,9 | 12,9 | 11,9 | 11,3 | 11,0 | 340 | 230 | 41,9 | 43,1 | 42,8 | 41,2 | 38,4 | 34,8 | 31,5 | 29,2 | 27,9 | 27,4 |
| 160 | 240 | 18,7 | 17,8 | 16,9 | 16,1 | 15,3 | 14,3 | 13,2 | 12,2 | 11,6 | 11,4 | 340 | 240 | 41,6 | 42,8 | 42,7 | 41,2 | 38,6 | 35,1 | 31,7 | 29,3 | 27,9 | 27,3 |
| 160 | 250 | 18,6 | 17,6 | 16,7 | 15,9 | 15,0 | 14,0 | 12,9 | 12,0 | 11,4 | 11,1 | 340 | 250 | 40,7 | 42,0 | 42,1 | 40,8 | 38,3 | 34,8 | 31,3 | 28,8 | 27,3 | 26,6 |
| 160 | 260 | 18,0 | 17,0 | 16,0 | 15,1 | 14,2 | 13,2 | 12,1 | 11,2 | 10,6 | 10,4 | 340 | 260 | 39,5 | 40,9 | 41,2 | 40,1 | 37,8 | 34,3 | 30,7 | 28,0 | 26,3 | 25,5 |
| 160 | 270 | 17,1 | 16,0 | 15,0 | 14,1 | 13,2 | 12,2 | 11,1 | 10,2 | 9,6  | 9,4  | 340 | 270 | 38,1 | 39,7 | 40,3 | 39,5 | 37,3 | 33,8 | 29,9 | 26,9 | 25,0 | 24,1 |
| 160 | 280 | 16,1 | 15,1 | 14,0 | 13,0 | 12,2 | 11,2 | 10,1 | 9,3  | 8,7  | 8,4  | 340 | 280 | 37,0 | 39,0 | 39,9 | 39,4 | 37,3 | 33,7 | 29,4 | 26,0 | 23,9 | 22,8 |
| 160 | 290 | 15,5 | 14,4 | 13,3 | 12,4 | 11,5 | 10,5 | 9,5  | 8,7  | 8,1  | 7,8  | 340 | 290 | 36,5 | 38,9 | 40,2 | 40,1 | 38,1 | 34,2 | 29,4 | 25,5 | 23,0 | 21,7 |
| 160 | 300 | 15,4 | 14,3 | 13,2 | 12,3 | 11,4 | 10,5 | 9,5  | 8,6  | 8,0  | 7,7  | 340 | 300 | 36,8 | 39,7 | 41,6 | 41,8 | 39,7 | 35,3 | 29,8 | 25,4 | 22,6 | 21,1 |
| 160 | 310 | 15,8 | 14,8 | 13,7 | 12,8 | 11,9 | 11,0 | 10,0 | 9,1  | 8,6  | 8,2  | 340 | 310 | 38,1 | 41,7 | 44,1 | 44,5 | 42,2 | 36,8 | 30,6 | 25,7 | 22,6 | 21,0 |
| 160 | 320 | 16,7 | 15,7 | 14,7 | 13,8 | 13,0 | 12,1 | 11,1 | 10,2 | 9,6  | 9,2  | 340 | 320 | 40,5 | 44,7 | 47,6 | 48,0 | 44,9 | 38,4 | 31,4 | 26,1 | 22,8 | 21,2 |
| 160 | 330 | 17,9 | 16,8 | 15,9 | 15,0 | 14,3 | 13,4 | 12,4 | 11,4 | 10,8 | 10,4 | 340 | 330 | 43,7 | 48,6 | 51,7 | 51,7 | 47,3 | 39,5 | 31,8 | 26,3 | 23,0 | 21,5 |
| 160 | 340 | 18,9 | 17,9 | 17,0 | 16,3 | 15,5 | 14,7 | 13,6 | 12,7 | 12,0 | 11,6 | 340 | 340 | 47,4 | 52,8 | 55,7 | 54,7 | 48,6 | 39,7 | 31,7 | 26,2 | 23,0 | 21,6 |
| 160 | 350 | 19,6 | 18,7 | 17,9 | 17,2 | 16,5 | 15,6 | 14,5 | 13,6 | 12,9 | 12,4 | 340 | 350 | 51,0 | 56,7 | 58,8 | 56,2 | 48,4 | 38,9 | 30,9 | 25,6 | 22,7 | 21,6 |
| 160 | 360 | 19,8 | 18,9 | 18,1 | 17,5 | 16,8 | 15,9 | 14,8 | 13,8 | 13,1 | 12,7 | 340 | 360 | 54,4 | 59,6 | 60,3 | 55,7 | 46,6 | 37,1 | 29,4 | 24,5 | 22,0 | 21,1 |
| 170 | 0   | 16,2 | 15,7 | 15,5 | 15,1 | 14,4 | 13,4 | 12,0 | 10,9 | 10,2 | 9,8  | 350 | 0   | 64,2 | 65,9 | 62,4 | 54,0 | 44,1 | 35,5 | 29,3 | 25,9 | 24,6 | 24,3 |
| 170 | 10  | 15,7 | 15,3 | 15,1 | 14,8 | 14,1 | 13,0 | 11,6 | 10,4 | 9,8  | 9,4  | 350 | 10  | 65,4 | 65,2 | 59,9 | 50,9 | 41,4 | 33,4 | 27,9 | 25,1 | 24,1 | 23,9 |
| 170 | 20  | 14,7 | 14,4 | 14,2 | 13,8 | 13,1 | 12,0 | 10,6 | 9,4  | 8,7  | 8,3  | 350 | 20  | 64,5 | 62,6 | 56,1 | 47,3 | 38,5 | 31,2 | 26,5 | 24,2 | 23,4 | 23,2 |
| 170 | 30  | 13,3 | 13,0 | 12,9 | 12,5 | 11,8 | 10,6 | 9,1  | 7,9  | 7,2  | 6,9  | 350 | 30  | 62,1 | 58,7 | 51,9 | 43,6 | 35,7 | 29,2 | 25,1 | 23,2 | 22,6 | 22,4 |
| 170 | 40  | 11,9 | 11,7 | 11,5 | 11,2 | 10,4 | 9,2  | 7,7  | 6,4  | 5,7  | 5,4  | 350 | 40  | 58,7 | 54,6 | 48,0 | 40,5 | 33,3 | 27,7 | 24,2 | 22,5 | 22,0 | 21,8 |
| 170 | 50  | 10,8 | 10,6 | 10,5 | 10,1 | 9,3  | 8,1  | 6,5  | 5,3  | 4,5  | 4,2  | 350 | 50  | 55,0 | 50,9 | 44,9 | 38,2 | 31,9 | 26,8 | 23,7 | 22,3 | 21,8 | 21,7 |
| 170 | 60  | 10,2 | 10,0 | 9,9  | 9,5  | 8,7  | 7,4  | 5,9  | 4,6  | 3,9  | 3,5  | 350 | 60  | 52,0 | 48,2 | 42,9 | 36,9 | 31,3 | 26,8 | 23,9 | 22,6 | 22,1 | 22,1 |
| 170 | 70  | 10,3 | 10,1 | 9,9  | 9,6  | 8,7  | 7,4  | 5,9  | 4,6  | 3,8  | 3,5  | 350 | 70  | 49,9 | 46,6 | 42,0 | 36,8 | 31,8 | 27,6 | 24,8 | 23,6 | 23,2 | 23,2 |
| 170 | 80  | 10,9 | 10,6 | 10,5 | 10,1 | 9,3  | 8,0  | 6,5  | 5,2  | 4,4  | 4,0  | 350 | 80  | 48,9 | 46,1 | 42,2 | 37,6 | 33,0 | 29,0 | 26,3 | 25,1 | 24,8 | 24,8 |
| 170 | 90  | 11,8 | 11,5 | 11,3 | 11,0 | 10,1 | 8,9  | 7,4  | 6,1  | 5,3  | 4,9  | 350 | 90  | 48,8 | 46,5 | 43,1 | 39,0 | 34,7 | 30,8 | 28,2 | 27,0 | 26,7 | 26,7 |
| 170 | 100 | 12,7 | 12,4 | 12,2 | 11,8 | 11,0 | 9,8  | 8,4  | 7,1  | 6,3  | 5,8  | 350 | 100 | 49,2 | 47,4 | 44,5 | 40,7 | 36,5 | 32,7 | 30,1 | 29,0 | 28,6 | 28,7 |
| 170 | 110 | 13,4 | 13,0 | 12,8 | 12,4 | 11,7 | 10,5 | 9,1  | 7,8  | 7,0  | 6,6  | 350 | 110 | 49,7 | 48,4 | 45,8 | 42,2 | 38,2 | 34,4 | 31,8 | 30,7 | 30,3 | 30,3 |
| 170 | 120 | 13,6 | 13,2 | 12,9 | 12,6 | 11,9 | 10,8 | 9,4  | 8,1  | 7,3  | 6,9  | 350 | 120 | 50,1 | 49,1 | 46,7 | 43,3 | 39,3 | 35,5 | 33,0 | 31,8 | 31,4 | 31,3 |
| 170 | 130 | 13,3 | 12,8 | 12,6 | 12,2 | 11,6 | 10,5 | 9,1  | 7,9  | 7,1  | 6,7  | 350 | 130 | 50,1 | 49,3 | 47,1 | 43,8 | 39,8 | 36,0 | 33,5 | 32,2 | 31,8 | 31,7 |
| 170 | 140 | 12,5 | 12,0 | 11,8 | 11,4 | 10,8 | 9,8  | 8,4  | 7,2  | 6,4  | 6,0  | 350 | 140 | 49,5 | 49,0 | 46,9 | 43,6 | 39,6 | 35,9 | 33,3 | 32,0 | 31,5 | 31,4 |
| 170 | 150 | 11,4 | 11,0 | 10,7 | 10,4 | 9,8  | 8,8  | 7,4  | 6,3  | 5,5  | 5,1  | 350 | 150 | 48,6 | 48,1 | 46,2 | 43,0 | 39,0 | 35,2 | 32,6 | 31,2 | 30,7 | 30,6 |
| 170 | 160 | 10,3 | 9,9  | 9,6  | 9,3  | 8,7  | 7,7  | 6,5  | 5,3  | 4,5  | 4,2  | 350 | 160 | 47,4 | 47,1 | 45,3 | 42,1 | 38,2 | 34,4 | 31,7 | 30,3 | 29,7 | 29,5 |
| 170 | 170 | 9,6  | 9,1  | 8,9  | 8,6  | 8,0  | 7,1  | 5,8  | 4,6  | 3,9  | 3,6  | 350 | 170 | 46,3 | 46,1 | 44,5 | 41,5 | 37,6 | 33,8 | 31,0 | 29,5 | 28,9 | 28,7 |
| 170 | 180 | 9,4  | 9,0  | 8,7  | 8,4  | 7,8  | 6,9  | 5,6  | 4,5  | 3,8  | 3,5  | 350 | 180 | 45,7 | 45,7 | 44,2 | 41,3 | 37,5 | 33,7 | 30,8 | 29,2 | 28,5 | 28,3 |
| 170 | 190 | 9,9  | 9,5  | 9,2  | 8,9  | 8,3  | 7,3  | 6,0  | 4,9  | 4,2  | 4,0  | 350 | 190 | 45,7 | 45,8 | 44,4 | 41,7 | 38,0 | 34,2 | 31,2 | 29,5 | 28,7 | 28,4 |
| 170 | 200 | 11,0 | 10,5 | 10,2 | 9,9  | 9,3  | 8,2  | 6,9  | 5,8  | 5,2  | 5,0  | 350 | 200 | 46,2 | 46,4 | 45,2 | 42,6 | 38,9 | 35,1 | 32,0 | 30,2 | 29,4 | 29,1 |
| 170 | 210 | 12,4 | 11,9 | 11,6 | 11,2 | 10,5 | 9,4  | 8,1  | 7,0  | 6,4  | 6,1  | 350 | 210 | 47,0 | 47,3 | 46,2 | 43,7 | 40,1 | 36,2 | 33,1 | 31,3 | 30,4 | 30,0 |
| 170 | 220 | 13,7 | 13,2 | 12,9 | 12,4 | 11,7 | 10,5 | 9,2  | 8,1  | 7,5  | 7,2  | 350 | 220 | 47,6 | 48,1 | 47,1 | 44,6 | 41,1 | 37,3 | 34,2 | 32,3 | 31,3 | 30,8 |
| 170 | 230 | 14,6 | 14,1 | 13,8 | 13,3 | 12,5 | 11,4 | 10,0 | 8,9  | 8,3  | 8,0  | 350 | 230 | 47,8 | 48,4 | 47,5 | 45,3 | 41,9 | 38,1 | 34,8 | 32,8 | 31,8 | 31,2 |
| 170 | 240 | 15,0 | 14,5 | 14,1 | 13,6 | 12,8 | 11,6 | 10,3 | 9,2  | 8,6  | 8,3  | 350 | 240 | 47,5 | 48,2 | 47,5 | 45,4 | 42,2 | 38,3 | 35,0 | 32,8 | 31,6 | 31,0 |
| 170 | 250 | 14,9 | 14,3 | 13,9 | 13,3 | 12,5 | 11,3 | 10,0 | 8,9  | 8,3  | 8,0  | 350 | 250 | 46,6 | 47,5 | 47,0 | 45,2 | 42,0 | 38,1 | 34,5 | 32,2 | 30,9 | 30,2 |
| 170 | 260 | 14,3 | 13,6 | 13,1 | 12,6 | 11,7 | 10,6 | 9,2  | 8,2  | 7,5  | 7,3  | 350 | 260 | 45,4 | 46,5 | 46,4 | 44,7 | 41,6 | 37,6 | 33,7 | 31,1 | 29,6 | 28,8 |
| 170 | 270 | 13,4 | 12,7 | 12,1 | 11,6 | 10,7 | 9,6  | 8,2  | 7,2  | 6,6  | 6,3  | 350 | 270 | 44,2 | 45,7 | 45,9 | 44,4 | 41,3 | 37,0 | 32,8 | 29,8 | 28,1 | 27,2 |
| 170 | 280 | 12,5 | 11,7 | 11,2 | 10,6 | 9,7  | 8,6  | 7,3  | 6,2  | 5,6  | 5,3  | 350 | 280 | 43,3 | 45,3 | 45,8 | 44,6 | 41,5 | 36,7 | 32,0 | 28,6 | 26,6 | 25,6 |
| 170 | 290 | 11,8 | 11,0 | 10,5 | 9,9  | 9,1  | 8,0  | 6,7  | 5,6  | 5,0  | 4,7  | 350 | 290 | 43,2 | 45,7 | 46,6 | 45,6 | 42,2 | 36,8 | 31,5 | 27,7 | 25,5 | 24,4 |
| 170 | 300 | 11,6 | 10,9 | 10,3 | 9,7  | 9,0  | 7,9  | 6,6  | 5,6  | 4,9  | 4,6  | 350 | 300 | 44,1 | 47,2 | 48,5 | 47,5 | 43,5 | 37,3 | 31,3 | 27,1 | 24,7 | 23,6 |
| 170 | 310 | 12,1 | 11,3 | 10,8 | 10,2 | 9,5  | 8,4  | 7,1  | 6,1  | 5,4  | 5,1  | 350 | 310 | 46,1 | 49,8 | 51,5 | 50,2 | 45,2 | 37,9 | 31,4 | 26,9 | 24,4 | 23,3 |
| 170 | 320 | 12,9 | 12,2 | 11,7 | 11,2 | 10,5 | 9,4  | 8,2  | 7,1  | 6,4  | 6,1  | 350 | 320 | 49,3 | 53,4 | 55,1 | 53,1 | 46,7 | 38,5 | 31,5 | 26,9 | 24,5 | 23,4 |
| 170 | 330 | 14,1 | 13,4 | 13,0 | 12,5 | 11,8 | 10,8 | 9,5  | 8,4  | 7,7  | 7,3  | 350 | 330 | 53,2 | 57,6 | 58,8 | 55,5 | 47,6 | 38,6 | 31,5 | 26,9 | 24,6 | 23,7 |
| 170 | 340 | 15,2 | 14,6 | 14,2 | 13,8 | 13,1 | 12,0 | 10,7 | 9,7  | 9,0  | 8,6  | 350 | 340 | 57,4 | 61,6 | 61,7 | 56,6 | 47,4 | 38,2 | 31,2 | 26,8 | 24,8 | 24,1 |
| 170 | 350 | 16,0 | 15,4 | 15,1 | 14,8 | 14,1 | 13,0 | 11,7 | 10,6 | 9,9  | 9,5  | 350 | 350 | 61,3 | 64,6 | 63,1 | 56,1 | 46,2 | 37,2 | 30,4 | 26,5 | 24,8 | 24,3 |
| 170 | 360 | 16,2 | 15,7 | 15,5 | 15,1 | 14,4 | 13,4 | 12,0 | 10,9 | 10,2 | 9,8  | 350 | 360 | 64,2 | 65,9 | 62,4 | 54,0 | 44,1 | 35,5 | 29,3 | 25,9 | 24,6 | 24,3 |
