# Supplementary material for: Weak intramolecular and intermolecular hydrogen bonding of benzyl alcohol, 2-phenylethanol and 2-phenylethylamine in the adsorption on graphitized thermal carbon black
Source: Royal Society of Chemistry journal article supplement (doi:10.1039/c5cp04295j), 2015-01-01
Supplement: c5cp04295j8.pdf [file c5cp04295j8.pdf]

| $\tau_1 \backslash \tau_2$ | 0    | 10   | 20   | 30   | 40   | 50  | 60  | 70  | 80  | 90   | 100  | 110  | 120  | 130  | 140  | 150  | 160 | 170 | 180 | 190 | 200 | 210  | 220  | 230  | 240  | 250  | 260  | 270  | 280 | 290 | 300 | 310 | 320  | 330  | 340  | 350  | 360  |
|----------------------------|------|------|------|------|------|-----|-----|-----|-----|------|------|------|------|------|------|------|-----|-----|-----|-----|-----|------|------|------|------|------|------|------|-----|-----|-----|-----|------|------|------|------|------|
| 0                          | 13,3 | 12,6 | 10,7 | 8,0  | 5,2  | 2,9 | 1,4 | 0,9 | 1,2 | 2,0  | 3,1  | 4,1  | 4,9  | 5,4  | 5,5  | 5,1  | 4,6 | 4,1 | 3,9 | 4,1 | 4,6 | 5,1  | 5,5  | 5,4  | 4,9  | 4,1  | 3,1  | 2,0  | 1,2 | 0,9 | 1,4 | 2,9 | 5,2  | 8,0  | 10,7 | 12,6 | 13,3 |
| 10                         | 12,3 | 10,7 | 8,2  | 5,4  | 2,9  | 1,1 | 0,2 | 0,1 | 0,8 | 1,9  | 3,2  | 4,3  | 5,1  | 5,3  | 5,1  | 4,6  | 4,1 | 3,6 | 3,6 | 3,9 | 4,6 | 5,3  | 5,9  | 6,0  | 5,7  | 5,0  | 4,1  | 3,3  | 2,8 | 2,9 | 3,8 | 5,5 | 7,8  | 10,1 | 11,9 | 12,8 | 12,3 |
| 20                         | 10,6 | 8,6  | 6,3  | 4,1  | 2,3  | 1,2 | 0,8 | 1,2 | 2,1 | 3,5  | 4,8  | 5,8  | 6,3  | 6,3  | 5,8  | 4,9  | 4,0 | 3,4 | 3,3 | 3,5 | 4,2 | 5,0  | 5,8  | 6,3  | 6,4  | 6,1  | 5,6  | 5,1  | 4,8 | 5,0 | 5,9 | 7,3 | 9,0  | 10,6 | 11,6 | 11,7 | 10,6 |
| 30                         | 9,5  | 7,9  | 6,2  | 4,5  | 3,1  | 2,1 | 1,9 | 2,4 | 3,5 | 5,1  | 6,7  | 8,0  | 8,5  | 8,2  | 7,3  | 6,1  | 5,0 | 4,2 | 3,8 | 3,8 | 4,3 | 5,2  | 6,1  | 6,8  | 7,1  | 7,2  | 6,9  | 6,6  | 6,4 | 6,6 | 7,2 | 8,3 | 9,6  | 10,6 | 11,1 | 10,6 | 9,5  |
| 40                         | 9,4  | 8,3  | 6,8  | 5,3  | 4,0  | 3,3 | 3,3 | 3,9 | 5,1 | 6,6  | 8,3  | 9,7  | 10,5 | 10,3 | 9,3  | 7,9  | 6,6 | 5,7 | 5,1 | 4,9 | 5,4 | 6,2  | 7,1  | 7,9  | 8,4  | 8,6  | 8,4  | 8,1  | 7,9 | 8,0 | 8,4 | 9,1 | 10,0 | 10,5 | 10,6 | 10,2 | 9,4  |
| 50                         | 9,6  | 8,6  | 7,4  | 6,2  | 5,1  | 4,4 | 4,4 | 5,1 | 6,3 | 7,9  | 9,5  | 10,9 | 11,8 | 11,8 | 11,0 | 9,7  | 8,4 | 7,3 | 6,6 | 6,4 | 6,8 | 7,6  | 8,5  | 9,3  | 9,9  | 10,1 | 9,9  | 9,5  | 9,1 | 8,9 | 9,0 | 9,4 | 9,8  | 10,2 | 10,3 | 10,1 | 9,6  |
| 60                         | 9,4  | 8,7  | 7,6  | 6,3  | 5,2  | 4,5 | 4,6 | 5,4 | 6,7 | 8,4  | 10,0 | 11,4 | 12,3 | 12,4 | 11,8 | 10,6 | 9,4 | 8,3 | 7,7 | 7,6 | 8,0 | 8,8  | 9,7  | 10,5 | 11,0 | 11,0 | 10,7 | 10,1 | 9,4 | 8,9 | 8,6 | 8,6 | 8,9  | 9,2  | 9,5  | 9,6  | 9,3  |
| 70                         | 8,7  | 8,0  | 7,0  | 5,8  | 4,8  | 4,3 | 4,4 | 5,3 | 6,6 | 8,3  | 9,9  | 11,3 | 12,1 | 12,3 | 11,7 | 10,7 | 9,6 | 8,6 | 8,0 | 8,0 | 8,6 | 9,4  | 10,3 | 11,1 | 11,4 | 11,3 | 10,7 | 9,8  | 8,8 | 7,9 | 7,3 | 7,1 | 7,3  | 7,8  | 8,4  | 8,8  | 8,7  |
| 80                         | 7,8  | 7,3  | 6,5  | 5,5  | 4,7  | 4,3 | 4,4 | 5,2 | 6,5 | 8,1  | 9,7  | 11,0 | 11,7 | 11,8 | 11,2 | 10,3 | 9,2 | 8,3 | 7,9 | 8,1 | 8,7 | 9,7  | 10,6 | 11,3 | 11,5 | 11,1 | 10,2 | 9,0  | 7,7 | 6,5 | 5,7 | 5,6 | 5,9  | 6,6  | 7,3  | 7,8  | 7,8  |
| 90                         | 7,5  | 7,3  | 6,7  | 5,9  | 5,2  | 4,8 | 4,9 | 5,7 | 6,9 | 8,4  | 9,9  | 11,0 | 11,5 | 11,4 | 10,8 | 9,9  | 8,9 | 8,1 | 7,8 | 8,1 | 8,9 | 9,9  | 10,8 | 11,5 | 11,5 | 11,0 | 9,8  | 8,3  | 6,7 | 5,5 | 4,7 | 4,6 | 4,9  | 5,7  | 6,5  | 7,2  | 7,5  |
| 100                        | 7,9  | 7,9  | 7,5  | 6,8  | 6,1  | 5,8 | 6,0 | 6,7 | 7,8 | 9,1  | 10,3 | 11,1 | 11,5 | 11,2 | 10,6 | 9,6  | 8,7 | 8,1 | 7,9 | 8,4 | 9,2 | 10,3 | 11,3 | 11,8 | 11,8 | 11,0 | 9,7  | 8,0  | 6,4 | 5,1 | 4,3 | 4,1 | 4,5  | 5,4  | 6,4  | 7,3  | 7,9  |
| 110                        | 8,8  | 8,9  | 8,6  | 8,0  | 7,5  | 7,3 | 7,4 | 8,0 | 8,8 | 9,8  | 10,7 | 11,3 | 11,4 | 11,1 | 10,3 | 9,4  | 8,6 | 8,0 | 8,0 | 8,6 | 9,6 | 10,7 | 11,7 | 12,3 | 12,2 | 11,3 | 9,9  | 8,2  | 6,5 | 5,2 | 4,4 | 4,2 | 4,7  | 5,8  | 7,0  | 8,1  | 8,8  |
| 120                        | 9,4  | 9,6  | 9,5  | 9,2  | 8,8  | 8,6 | 8,6 | 8,8 | 9,4 | 10,1 | 10,7 | 11,0 | 11,0 | 10,5 | 9,7  | 8,8  | 8,0 | 7,6 | 7,7 | 8,3 | 9,4 | 10,7 | 11,8 | 12,4 | 12,3 | 11,4 | 10,1 | 8,4  | 6,7 | 5,4 | 4,6 | 4,6 | 5,2  | 6,3  | 7,6  | 8,7  | 9,4  |
| 130                        | 9,5  | 10,0 | 10,1 | 9,9  | 9,5  | 9,1 | 8,8 | 8,8 | 9,1 | 9,5  | 9,9  | 10,1 | 9,9  | 9,4  | 8,6  | 7,6  | 6,9 | 6,5 | 6,6 | 7,3 | 8,4 | 9,7  | 11,0 | 11,8 | 11,8 | 10,9 | 9,6  | 8,0  | 6,4 | 5,2 | 4,5 | 4,5 | 5,1  | 6,1  | 7,4  | 8,5  | 9,5  |
| 140                        | 9,1  | 9,8  | 10,2 | 10,2 | 9,7  | 9,0 | 8,3 | 8,0 | 8,0 | 8,2  | 8,5  | 8,7  | 8,5  | 7,9  | 7,1  | 6,2  | 5,4 | 5,0 | 5,1 | 5,8 | 6,7 | 8,0  | 9,4  | 10,4 | 10,6 | 9,8  | 8,3  | 6,6  | 5,1 | 3,9 | 3,2 | 3,3 | 4,0  | 5,2  | 6,6  | 8,1  | 9,1  |
| 150                        | 9,1  | 10,2 | 10,8 | 10,5 | 9,5  | 8,4 | 7,4 | 6,8 | 6,6 | 6,8  | 7,1  | 7,3  | 7,2  | 6,8  | 6,1  | 5,2  | 4,4 | 3,8 | 3,9 | 4,3 | 5,1 | 6,3  | 7,5  | 8,3  | 8,7  | 8,2  | 6,8  | 5,2  | 3,6 | 2,4 | 1,8 | 2,0 | 2,9  | 4,3  | 5,9  | 7,5  | 9,1  |
| 160                        | 10,3 | 11,5 | 11,6 | 10,7 | 9,2  | 7,5 | 6,1 | 5,2 | 5,0 | 5,2  | 5,7  | 6,2  | 6,4  | 6,3  | 5,8  | 5,0  | 4,2 | 3,5 | 3,3 | 3,5 | 4,1 | 5,0  | 5,9  | 6,5  | 6,4  | 5,8  | 4,8  | 3,4  | 2,1 | 1,1 | 0,6 | 1,0 | 2,1  | 3,8  | 6,0  | 8,3  | 10,3 |
| 170                        | 12,3 | 12,8 | 12,0 | 10,2 | 8,0  | 5,7 | 4,0 | 3,0 | 2,9 | 3,4  | 4,2  | 5,0  | 5,7  | 5,9  | 5,8  | 5,3  | 4,5 | 3,9 | 3,6 | 3,7 | 4,1 | 4,7  | 5,2  | 5,4  | 5,1  | 4,3  | 3,2  | 1,9  | 0,7 | 0,0 | 0,0 | 0,9 | 2,7  | 5,2  | 8,0  | 10,5 | 12,3 |
| 180                        | 13,3 | 12,6 | 10,7 | 8,0  | 5,3  | 2,9 | 1,4 | 0,8 | 1,1 | 2,0  | 3,1  | 4,1  | 5,0  | 5,4  | 5,5  | 5,1  | 4,6 | 4,1 | 3,9 | 4,1 | 4,6 | 5,1  | 5,5  | 5,4  | 5,0  | 4,1  | 3,1  | 2,0  | 1,1 | 0,8 | 1,4 | 2,9 | 5,3  | 8,0  | 10,7 | 12,6 | 13,3 |
| 190                        | 12,3 | 10,5 | 8,0  | 5,2  | 2,7  | 0,9 | 0,0 | 0,0 | 0,7 | 1,9  | 3,2  | 4,3  | 5,1  | 5,4  | 5,2  | 4,7  | 4,1 | 3,7 | 3,6 | 3,9 | 4,6 | 5,3  | 5,8  | 5,9  | 5,7  | 5,0  | 4,2  | 3,4  | 2,9 | 3,0 | 4,0 | 5,7 | 8,0  | 10,2 | 12,0 | 12,8 | 12,3 |
| 200                        | 10,3 | 8,3  | 6,0  | 3,8  | 2,1  | 1,0 | 0,6 | 1,1 | 2,1 | 3,4  | 4,8  | 5,8  | 6,4  | 6,5  | 5,9  | 5,0  | 4,1 | 3,5 | 3,3 | 3,5 | 4,2 | 5,0  | 5,8  | 6,3  | 6,4  | 6,2  | 5,7  | 5,2  | 5,0 | 5,2 | 6,1 | 7,5 | 9,2  | 10,7 | 11,6 | 11,5 | 10,3 |
| 210                        | 9,1  | 7,5  | 5,9  | 4,3  | 2,9  | 2,0 | 1,8 | 2,4 | 3,6 | 5,2  | 6,8  | 8,2  | 8,7  | 8,3  | 7,5  | 6,3  | 5,1 | 4,2 | 3,8 | 3,8 | 4,3 | 5,2  | 6,1  | 6,8  | 7,2  | 7,3  | 7,1  | 6,8  | 6,6 | 6,8 | 7,4 | 8,4 | 9,5  | 10,5 | 10,8 | 10,2 | 9,1  |
| 220                        | 9,1  | 8,1  | 6,6  | 5,2  | 4,0  | 3,3 | 3,2 | 3,9 | 5,1 | 6,6  | 8,3  | 9,8  | 10,6 | 10,4 | 9,4  | 8,0  | 6,7 | 5,7 | 5,1 | 5,0 | 5,4 | 6,2  | 7,1  | 7,9  | 8,5  | 8,7  | 8,5  | 8,2  | 8,0 | 8,0 | 8,3 | 9,0 | 9,7  | 10,2 | 10,2 | 9,8  | 9,1  |
| 230                        | 9,5  | 8,5  | 7,4  | 6,1  | 5,1  | 4,5 | 4,5 | 5,2 | 6,4 | 8,0  | 9,6  | 10,9 | 11,8 | 11,8 | 11,0 | 9,7  | 8,4 | 7,3 | 6,6 | 6,5 | 6,8 | 7,6  | 8,6  | 9,4  | 9,9  | 10,1 | 9,9  | 9,5  | 9,1 | 8,8 | 8,8 | 9,1 | 9,5  | 9,9  | 10,1 | 10,0 | 9,5  |
| 240                        | 9,4  | 8,7  | 7,6  | 6,3  | 5,2  | 4,6 | 4,6 | 5,4 | 6,7 | 8,4  | 10,1 | 11,4 | 12,3 | 12,4 | 11,8 | 10,7 | 9,4 | 8,4 | 7,7 | 7,6 | 8,0 | 8,8  | 9,7  | 10,5 | 11,0 | 11,0 | 10,7 | 10,1 | 9,4 | 8,8 | 8,5 | 8,6 | 8,8  | 9,2  | 9,5  | 9,6  | 9,4  |
| 250                        | 8,8  | 8,1  | 7,0  | 5,8  | 4,7  | 4,2 | 4,4 | 5,2 | 6,5 | 8,2  | 9,9  | 11,3 | 12,2 | 12,3 | 11,7 | 10,7 | 9,6 | 8,6 | 8,0 | 8,0 | 8,6 | 9,4  | 10,3 | 11,1 | 11,4 | 11,3 | 10,7 | 9,8  | 8,8 | 8,0 | 7,4 | 7,3 | 7,5  | 8,0  | 8,6  | 8,9  | 8,8  |
| 260                        | 7,9  | 7,3  | 6,4  | 5,4  | 4,5  | 4,1 | 4,3 | 5,1 | 6,4 | 8,0  | 9,7  | 11,0 | 11,8 | 11,8 | 11,3 | 10,3 | 9,2 | 8,3 | 7,9 | 8,0 | 8,7 | 9,6  | 10,6 | 11,2 | 11,5 | 11,1 | 10,3 | 9,1  | 7,8 | 6,7 | 6,0 | 5,8 | 6,1  | 6,8  | 7,5  | 7,9  | 7,9  |
| 270                        | 7,5  | 7,2  | 6,5  | 5,7  | 4,9  | 4,6 | 4,7 | 5,5 | 6,7 | 8,3  | 9,8  | 11,0 | 11,5 | 11,5 | 10,8 | 9,9  | 8,9 | 8,1 | 7,8 | 8,1 | 8,9 | 9,9  | 10,8 | 11,4 | 11,5 | 11,0 | 9,8  | 8,4  | 6,9 | 5,7 | 4,9 | 4,8 | 5,2  | 5,9  | 6,7  | 7,3  | 7,5  |
| 280                        | 7,8  | 7,8  | 7,3  | 6,6  | 5,9  | 5,5 | 5,7 | 6,5 | 7,7 | 9,0  | 10,2 | 11,1 | 11,5 | 11,3 | 10,6 | 9,6  | 8,7 | 8,1 | 7,9 | 8,3 | 9,2 | 10,3 | 11,2 | 11,8 | 11,7 | 11,0 | 9,7  | 8,1  | 6,5 | 5,2 | 4,4 | 4,3 | 4,7  | 5,5  | 6,5  | 7,3  | 7,8  |
| 290                        | 8,7  | 8,8  | 8,4  | 7,8  | 7,3  | 7,1 | 7,3 | 7,9 | 8,8 | 9,8  | 10,7 | 11,3 | 11,4 | 11,1 | 10,3 | 9,4  | 8,6 | 8,0 | 8,0 | 8,6 | 9,5 | 10,7 | 11,7 | 12,3 | 12,1 | 11,3 | 9,9  | 8,3  | 6,6 | 5,3 | 4,4 | 4,3 | 4,8  | 5,8  | 7,0  | 8,0  | 8,7  |
| 300                        | 9,4  | 9,6  | 9,5  | 9,2  | 8,9  | 8,7 | 8,6 | 8,9 | 9,4 | 10,1 | 10,7 | 11,0 | 11,0 | 10,5 | 9,7  | 8,8  | 8,0 | 7,6 | 7,7 | 8,3 | 9,4 | 10,7 | 11,8 | 12,4 | 12,3 | 11,4 | 10,0 | 8,4  | 6,7 | 5,4 | 4,6 | 4,5 | 5,2  | 6,3  | 7,6  | 8,7  | 9,4  |
| 310                        | 9,6  | 10,1 | 10,3 | 10,2 | 9,8  | 9,4 | 9,0 | 8,9 | 9,1 | 9,5  | 9,9  | 10,1 | 9,9  | 9,3  | 8,5  | 7,6  | 6,8 | 6,4 | 6,6 | 7,3 | 8,4 | 9,7  | 11,0 | 11,8 | 11,8 | 10,9 | 9,5  | 7,9  | 6,3 | 5,1 | 4,4 | 4,4 | 5,1  | 6,2  | 7,4  | 8,6  | 9,6  |
| 320                        | 9,4  | 10,2 | 10,6 | 10,5 | 10,0 | 9,1 | 8,4 | 8,0 | 7,9 | 8,1  | 8,4  | 8,6  | 8,4  | 7,9  | 7,1  | 6,2  | 5,4 | 4,9 | 5,1 | 5,7 | 6,7 | 7,9  | 9,3  | 10,3 | 10,5 | 9,7  | 8,3  | 6,6  | 5,1 | 3,9 | 3,3 | 3,3 | 4,0  | 5,3  | 6,8  | 8,3  | 9,4  |
| 330                        | 9,5  | 10,6 | 11,1 | 10,6 | 9,6  | 8,3 | 7,2 | 6,6 | 6,4 | 6,6  | 6,9  | 7,2  | 7,1  | 6,7  | 6,1  | 5,2  | 4,3 | 3,8 | 3,8 | 4,2 | 5,0 | 6,1  | 7,3  | 8,2  | 8,5  | 8,0  | 6,7  | 5,1  | 3,5 | 2,4 | 1,9 | 2,1 | 3,1  | 4,5  | 6,2  | 7,9  | 9,5  |
| 340                        | 10,6 | 11,7 | 11,6 | 10,6 | 9,0  | 7,3 | 5,9 | 5,0 | 4,8 | 5,1  | 5,6  | 6,1  | 6,4  | 6,3  | 5,8  | 5,0  | 4,2 | 3,5 | 3,3 | 3,4 | 4,0 | 4,9  | 5,8  | 6,3  | 6,3  | 5,8  | 4,8  | 3,5  | 2,1 | 1,2 | 0,8 | 1,2 | 2,3  | 4,1  | 6,3  | 8,6  | 10,6 |
| 350                        | 12,3 | 12,8 | 11,9 | 10,1 | 7,8  | 5,5 | 3,8 | 2,9 | 2,8 | 3,3  | 4,1  | 5,0  | 5,7  | 6,0  | 5,9  | 5,3  | 4,6 | 3,9 | 3,6 | 3,6 | 4,1 | 4,6  | 5,1  | 5,3  | 5,1  | 4,3  | 3,2  | 1,9  | 0,8 | 0,1 | 0,2 | 1,1 | 2,9  | 5,4  | 8,2  | 10,7 | 12,3 |
| 360                        | 13,3 | 12,6 | 10,7 | 8,0  | 5,2  | 2,9 | 1,4 | 0,9 | 1,2 | 2,0  | 3,1  | 4,1  | 4,9  | 5,4  | 5,5  | 5,1  | 4,6 | 4,1 | 3,9 | 4,1 | 4,6 | 5,1  | 5,5  | 5,4  | 4,9  | 4,1  | 3,1  | 2,0  | 1,2 | 0,9 | 1,4 | 2,9 | 5,2  | 8,0  | 10,7 | 12,6 | 13,3 |
