# Supplementary material for: Weak intramolecular and intermolecular hydrogen bonding of benzyl alcohol, 2-phenylethanol and 2-phenylethylamine in the adsorption on graphitized thermal carbon black
Source: Royal Society of Chemistry journal article supplement (doi:10.1039/c5cp04295j), 2015-01-01
Supplement: c5cp04295j11.pdf [file c5cp04295j11.pdf]

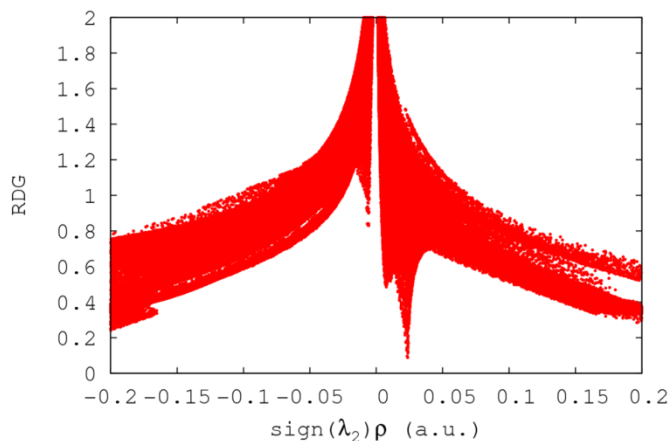

Plot of the RDG vs.  $\text{sign}(\lambda_2)\rho$  of the **BA1**

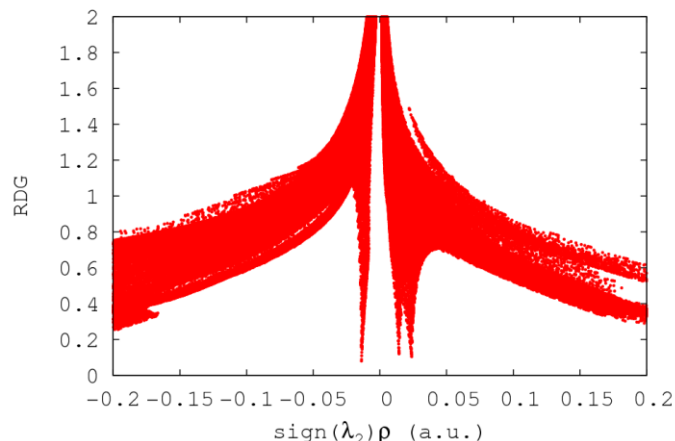

Plot of the RDG vs.  $\text{sign}(\lambda_2)\rho$  of the **BA2**

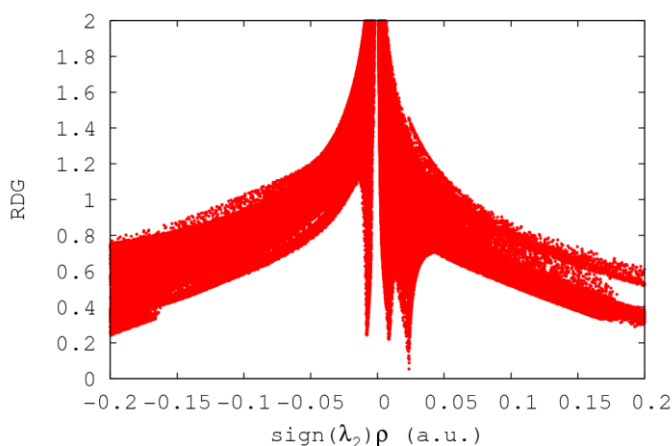

Plot of the RDG vs.  $\text{sign}(\lambda_2)\rho$  of the **PE1**

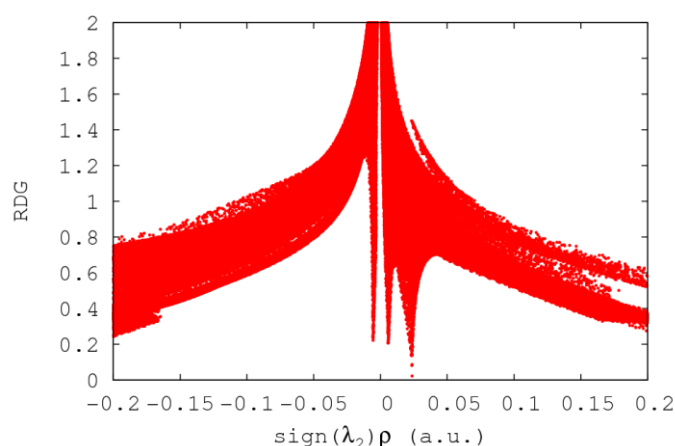

Plot of the RDG vs.  $\text{sign}(\lambda_2)\rho$  of the **PE4**

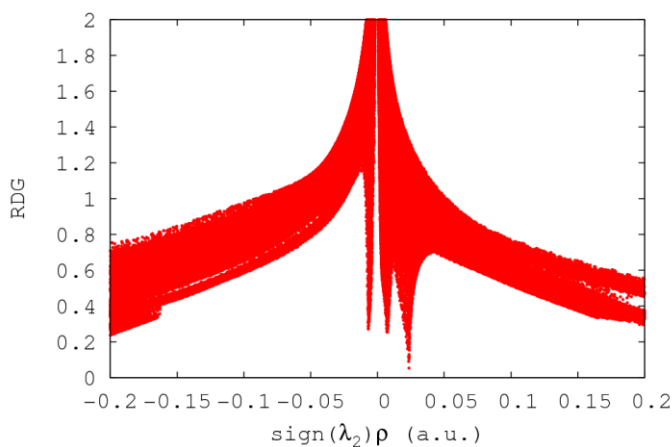

Plot of the RDG vs.  $\text{sign}(\lambda_2)\rho$  of the **PEA3**

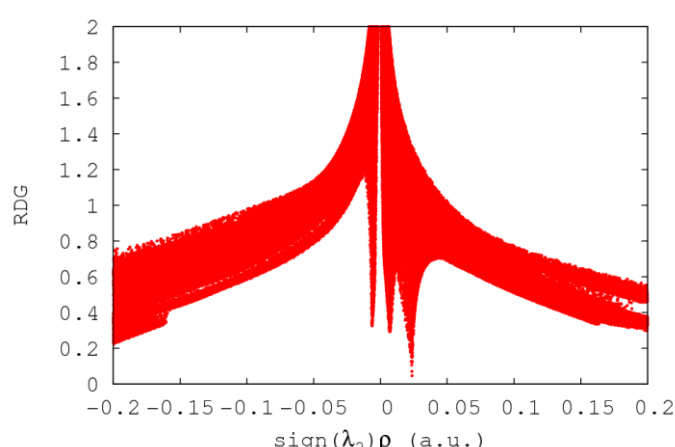

Plot of the RDG vs.  $\text{sign}(\lambda_2)\rho$  of the **PEA4**

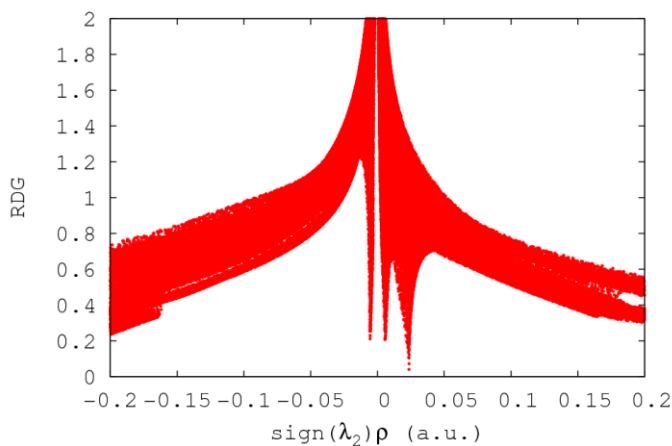

Plot of the RDG vs.  $\text{sign}(\lambda_2)\rho$  of the **PEA5**

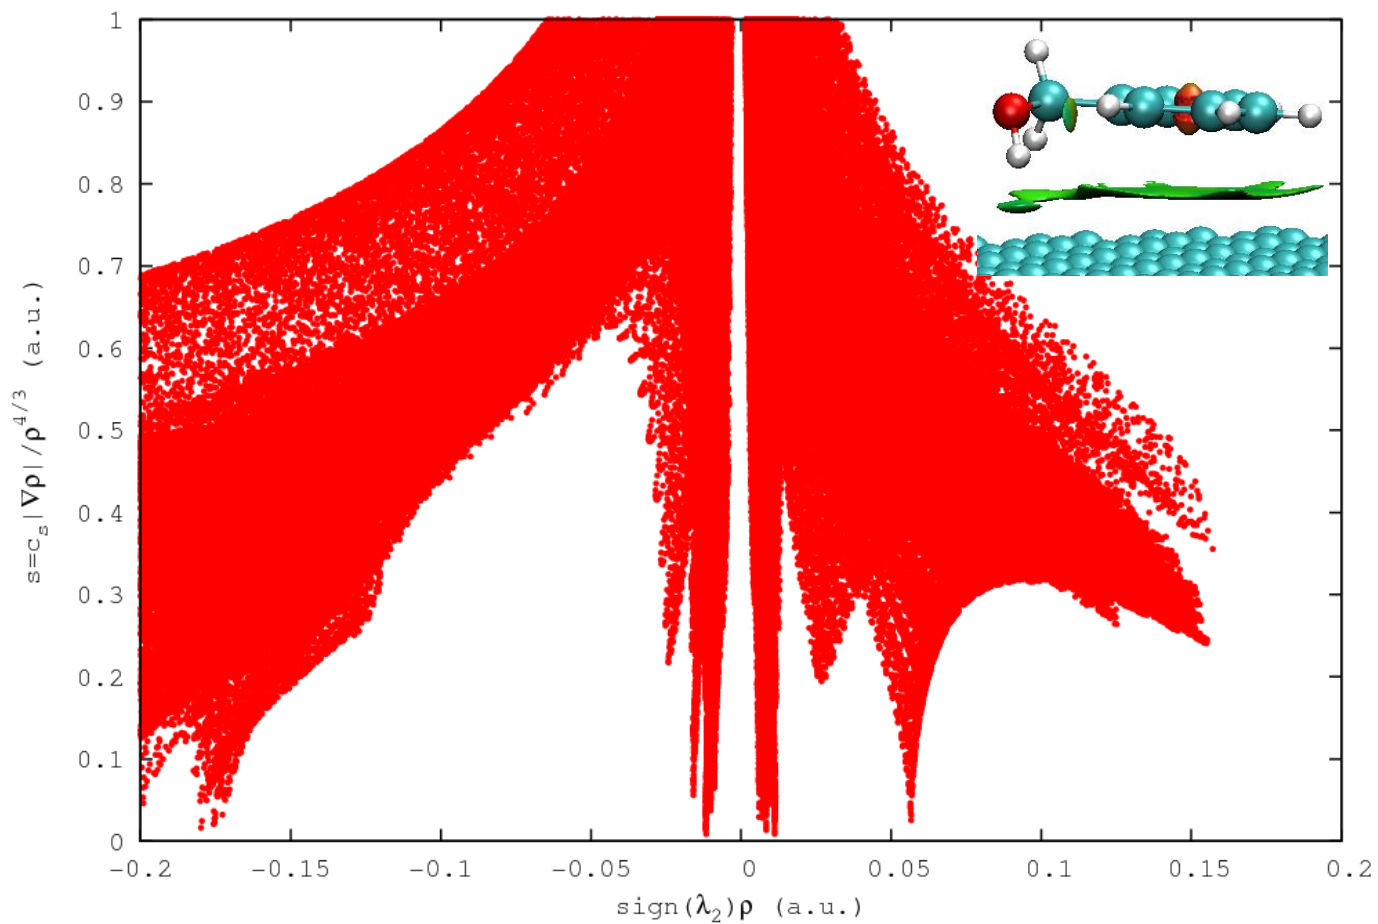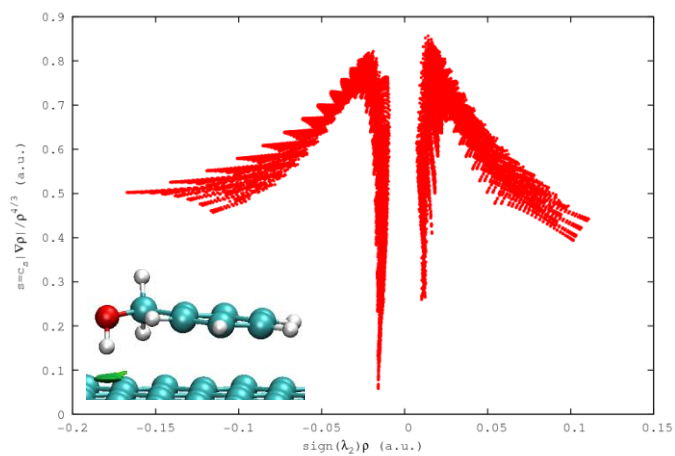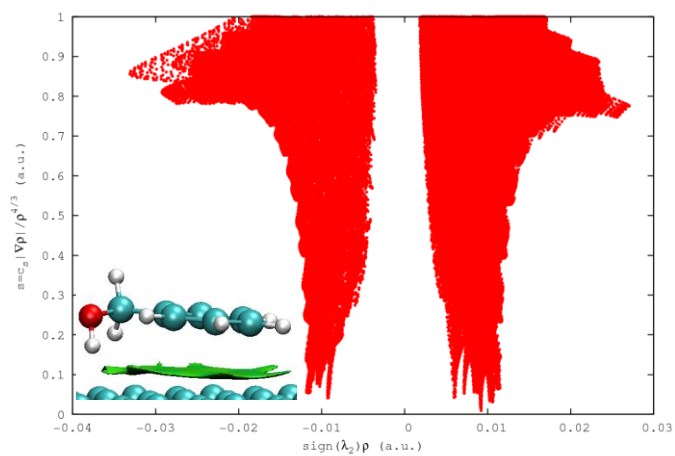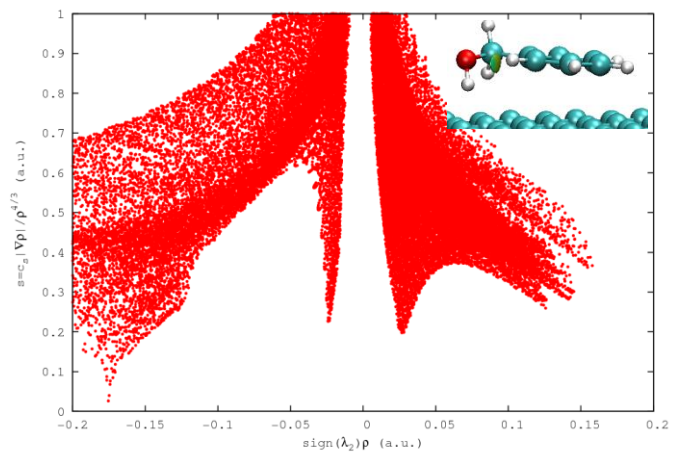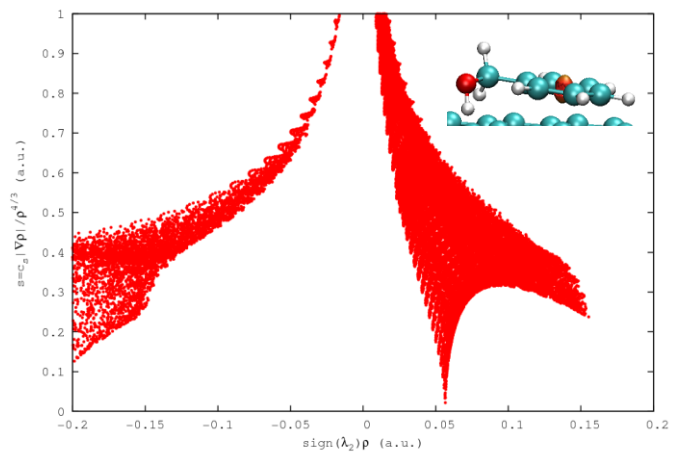

Plot of the RDG vs.  $\text{sign}(\lambda_2)\rho$  of the **BA1<sup>ads</sup>**

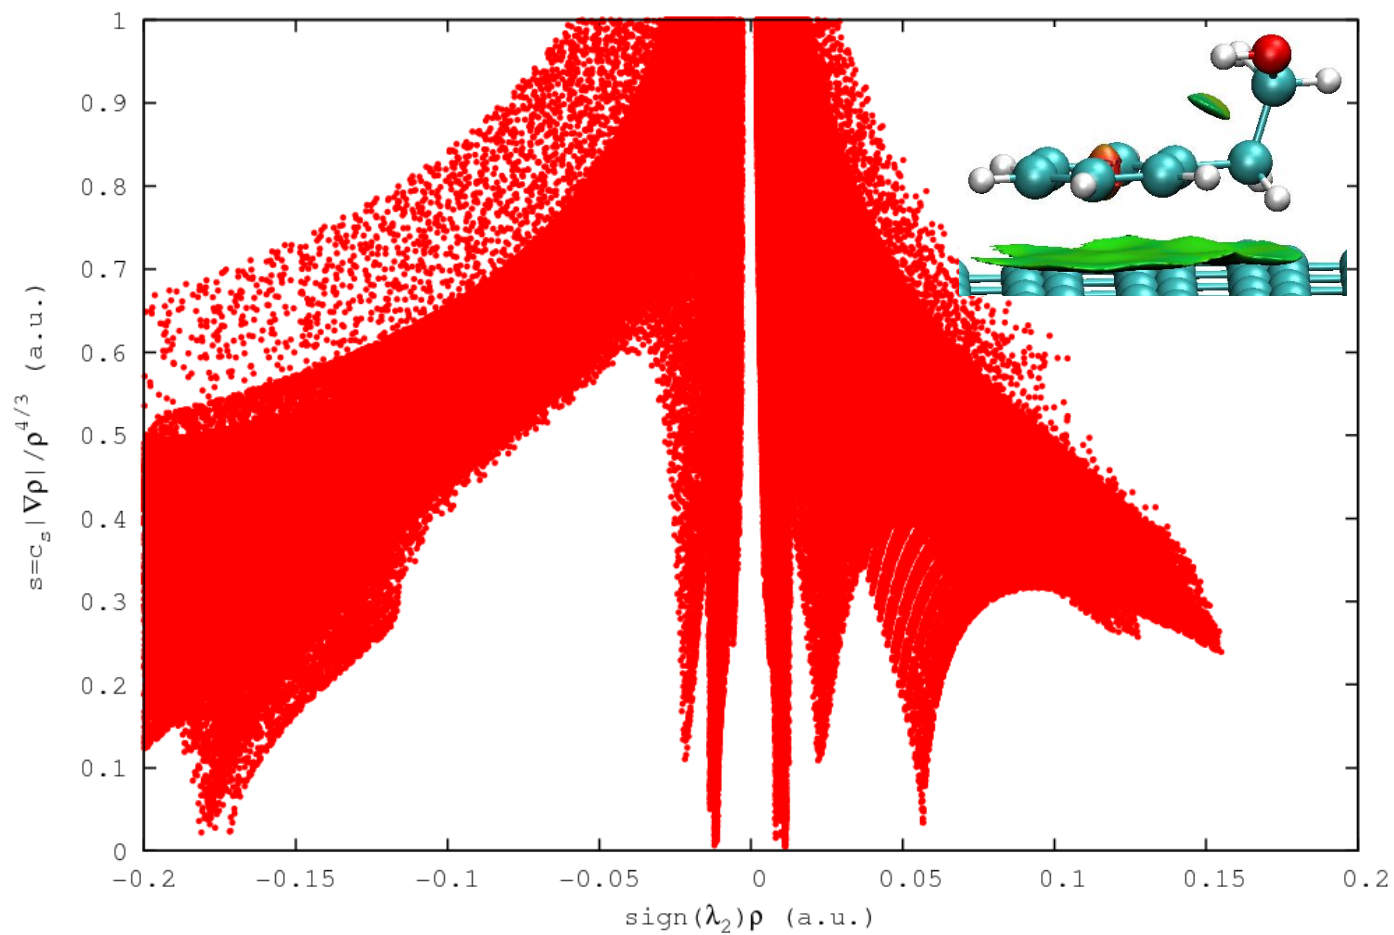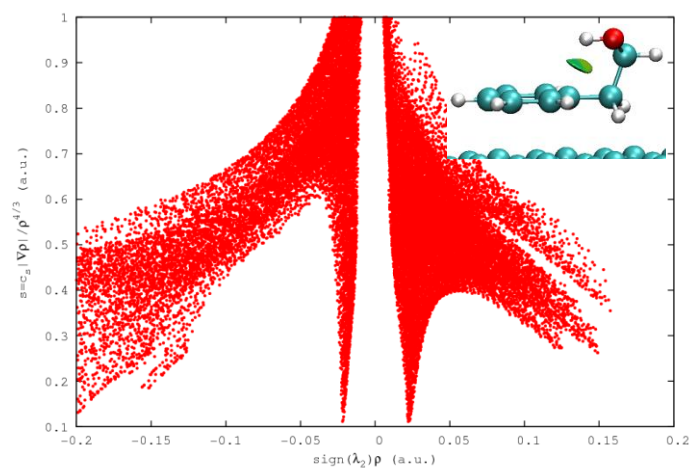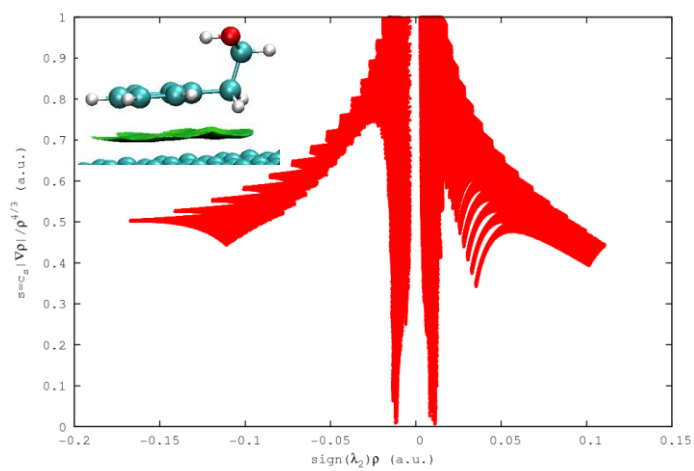

Plot of the RDG vs.  $\text{sign}(\lambda_2)\rho$  of the **PE1<sup>ads</sup>**

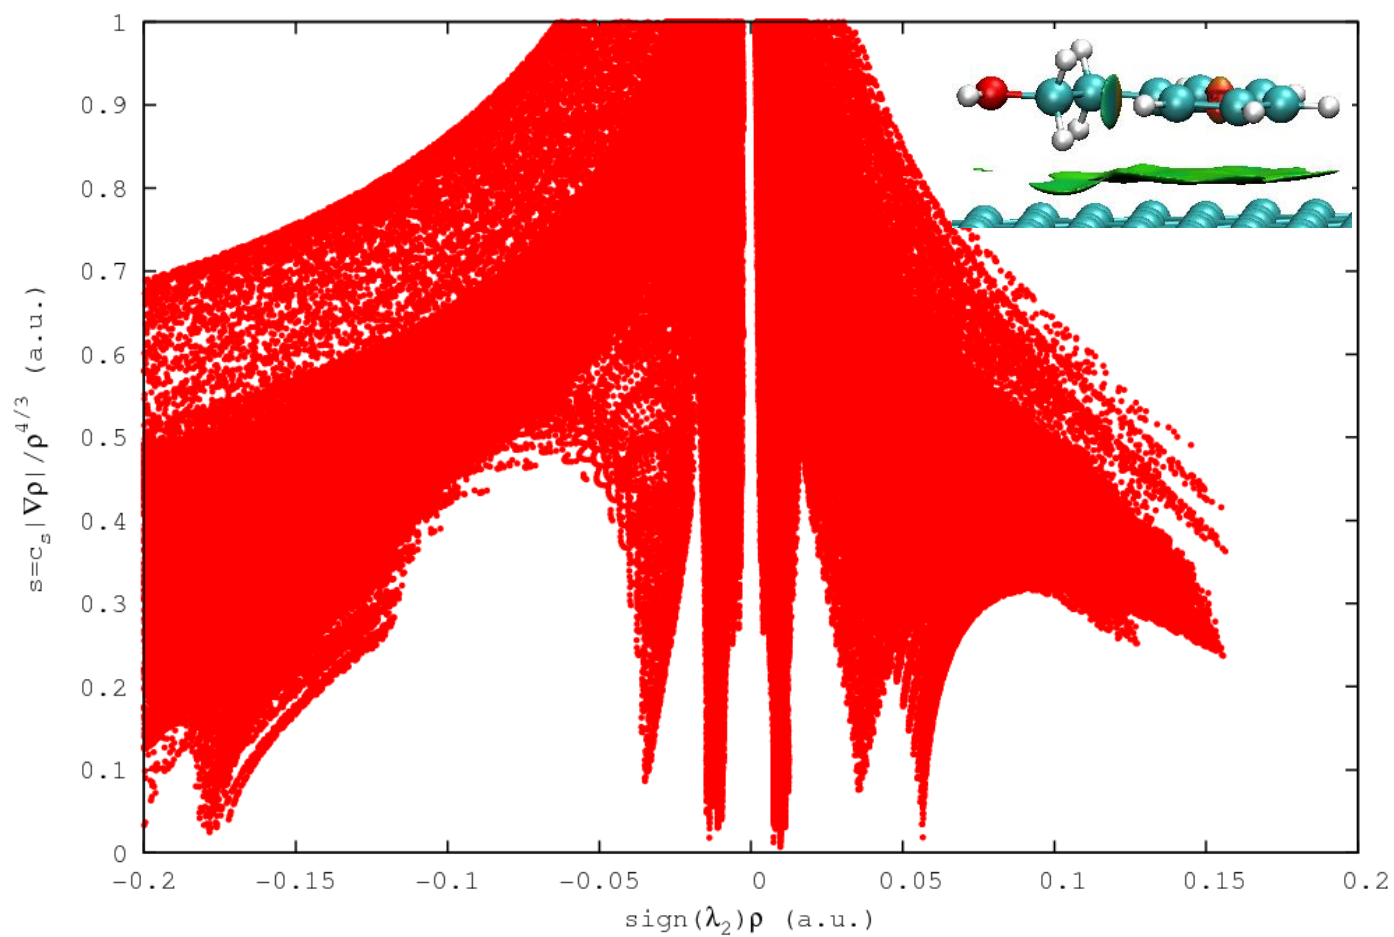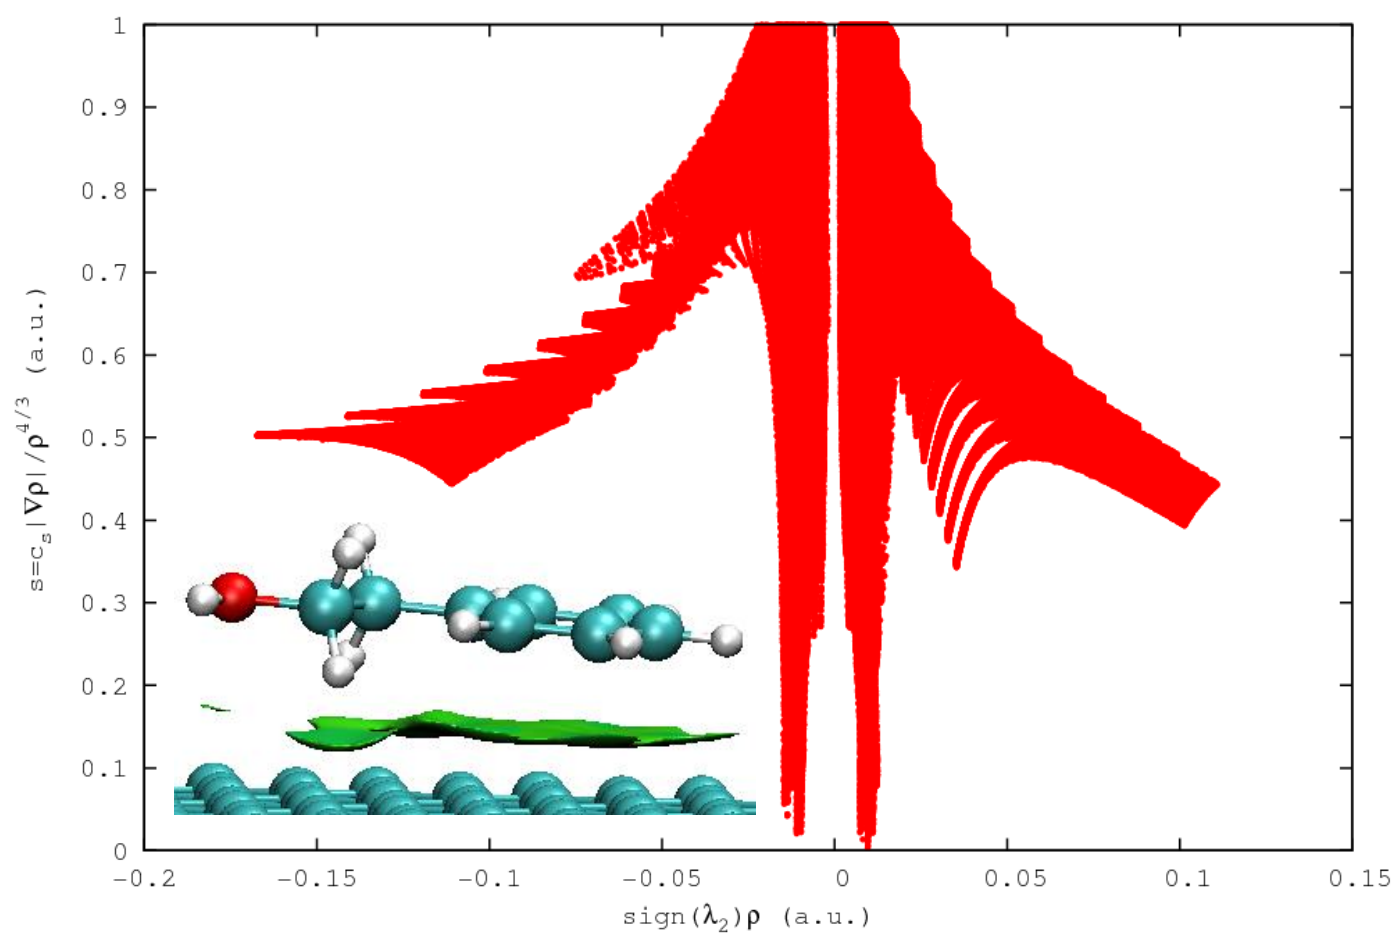

Plot of the RDG vs.  $\text{sign}(\lambda_2)\rho$  of the  $\text{PE}_2^{\text{ads}}$

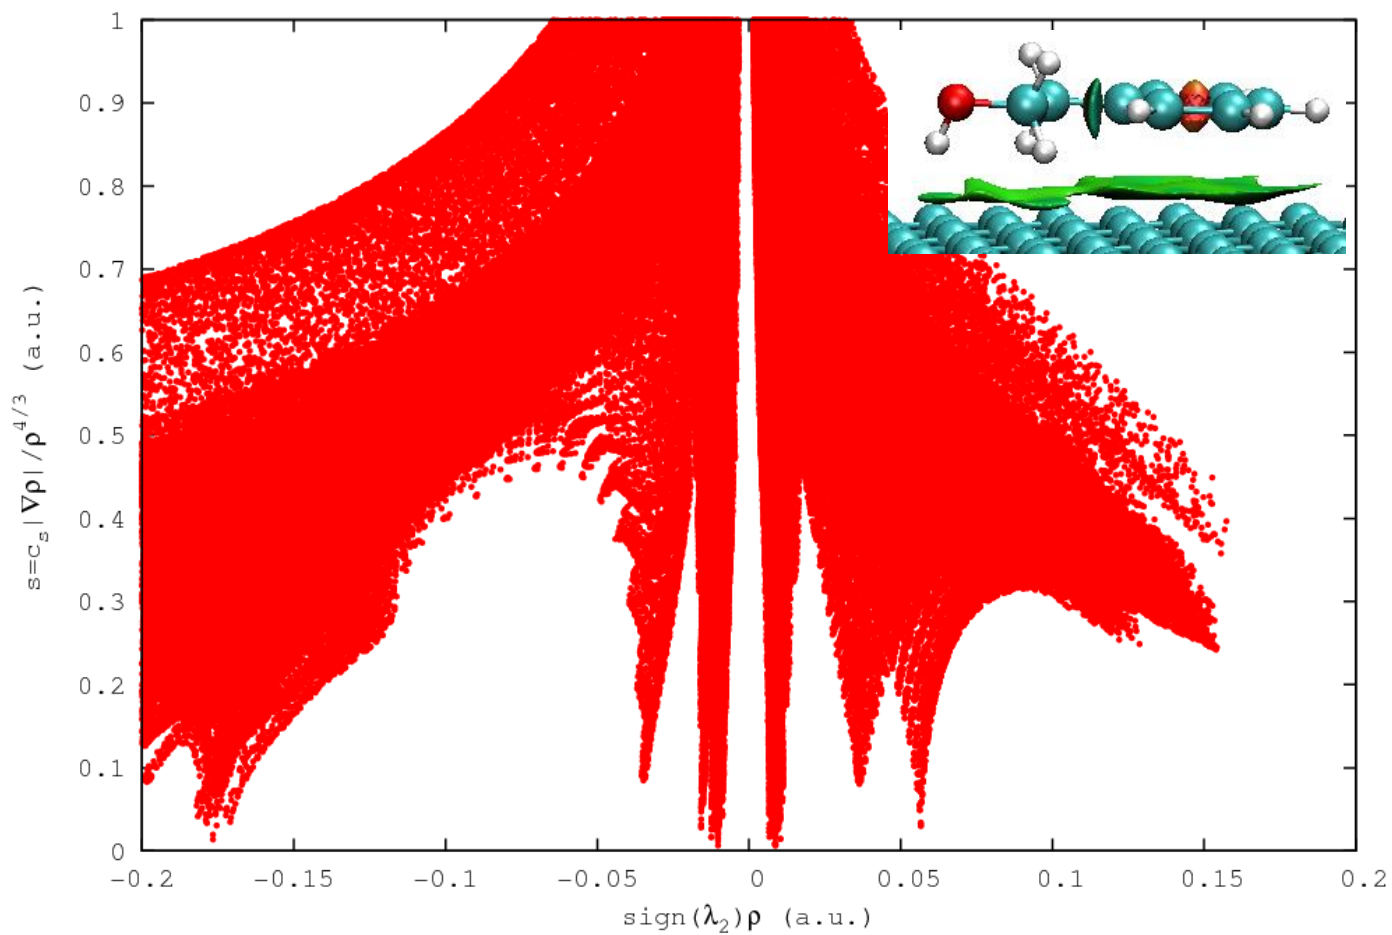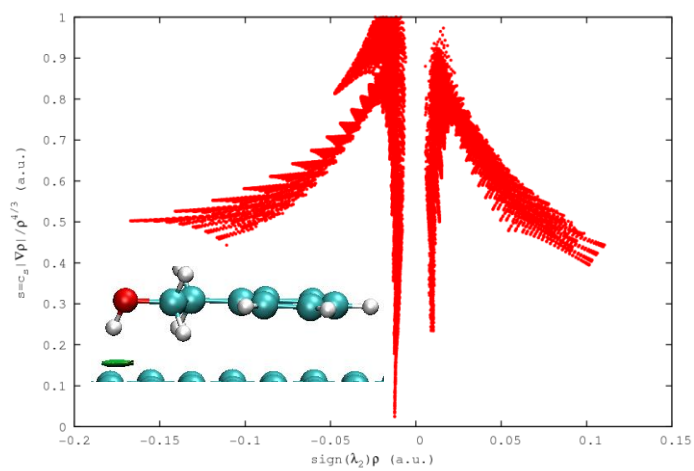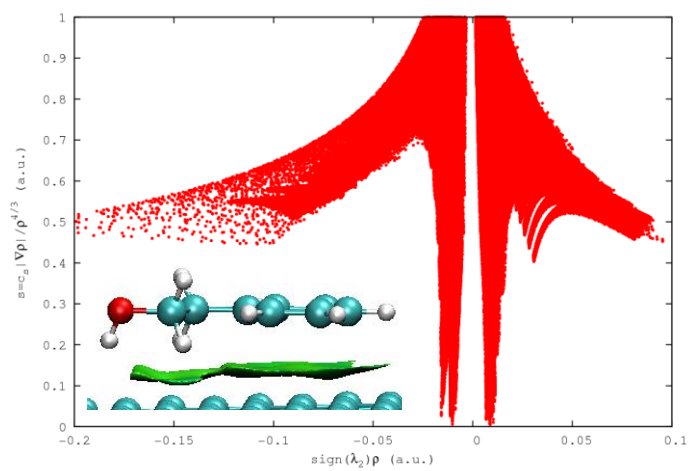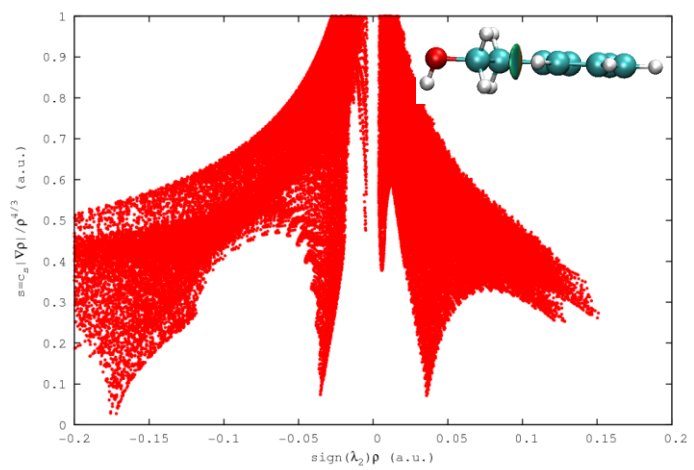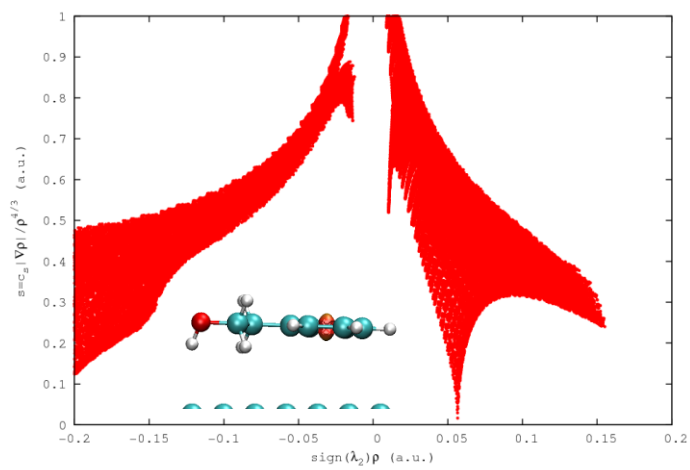

Plot of the RDG vs.  $\text{sign}(\lambda_2)\rho$  of the **PE3<sup>ads</sup>**

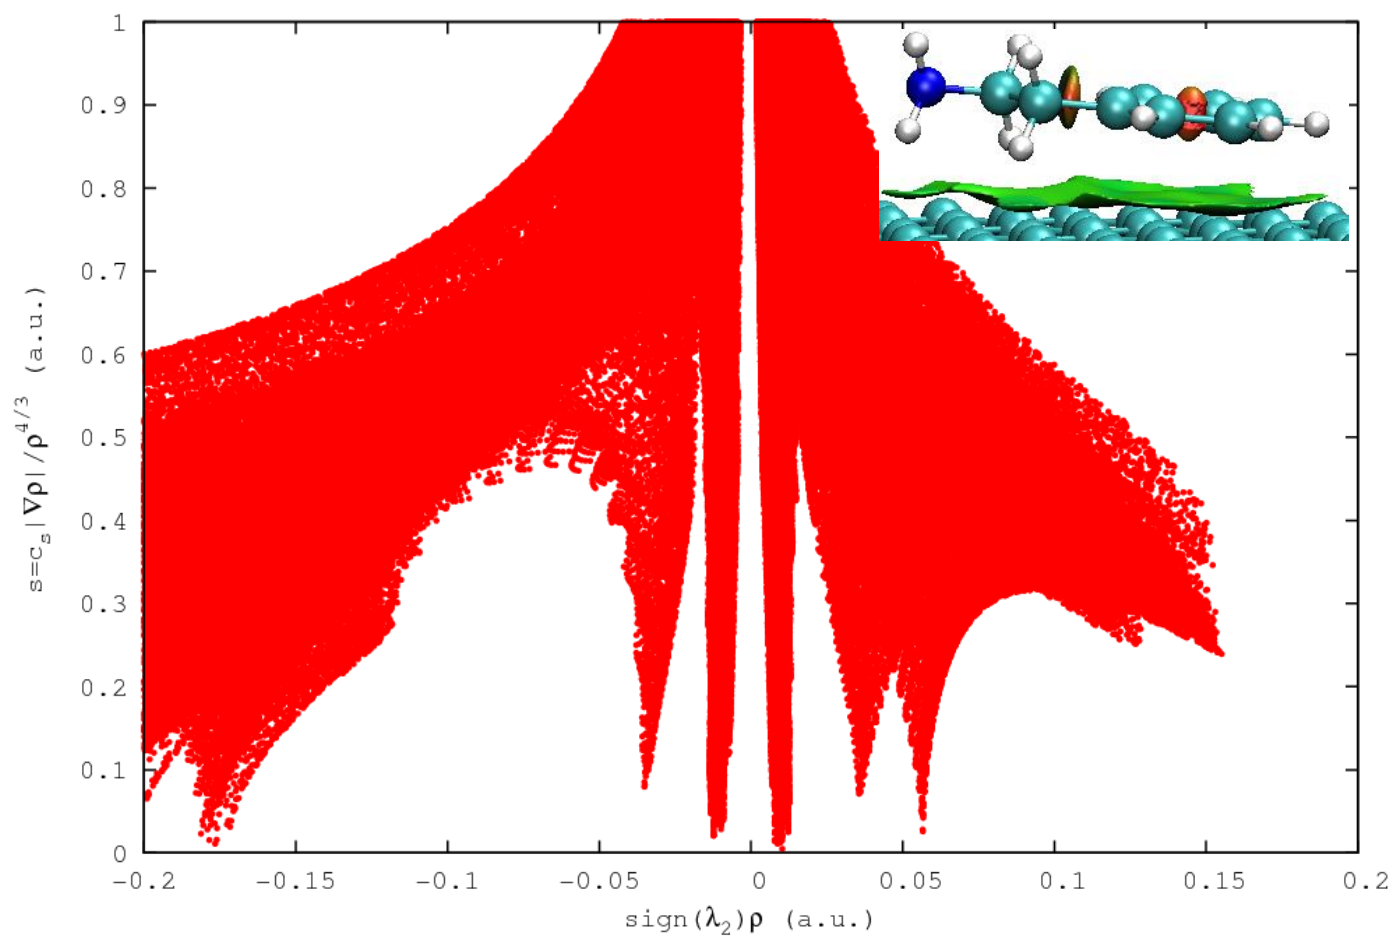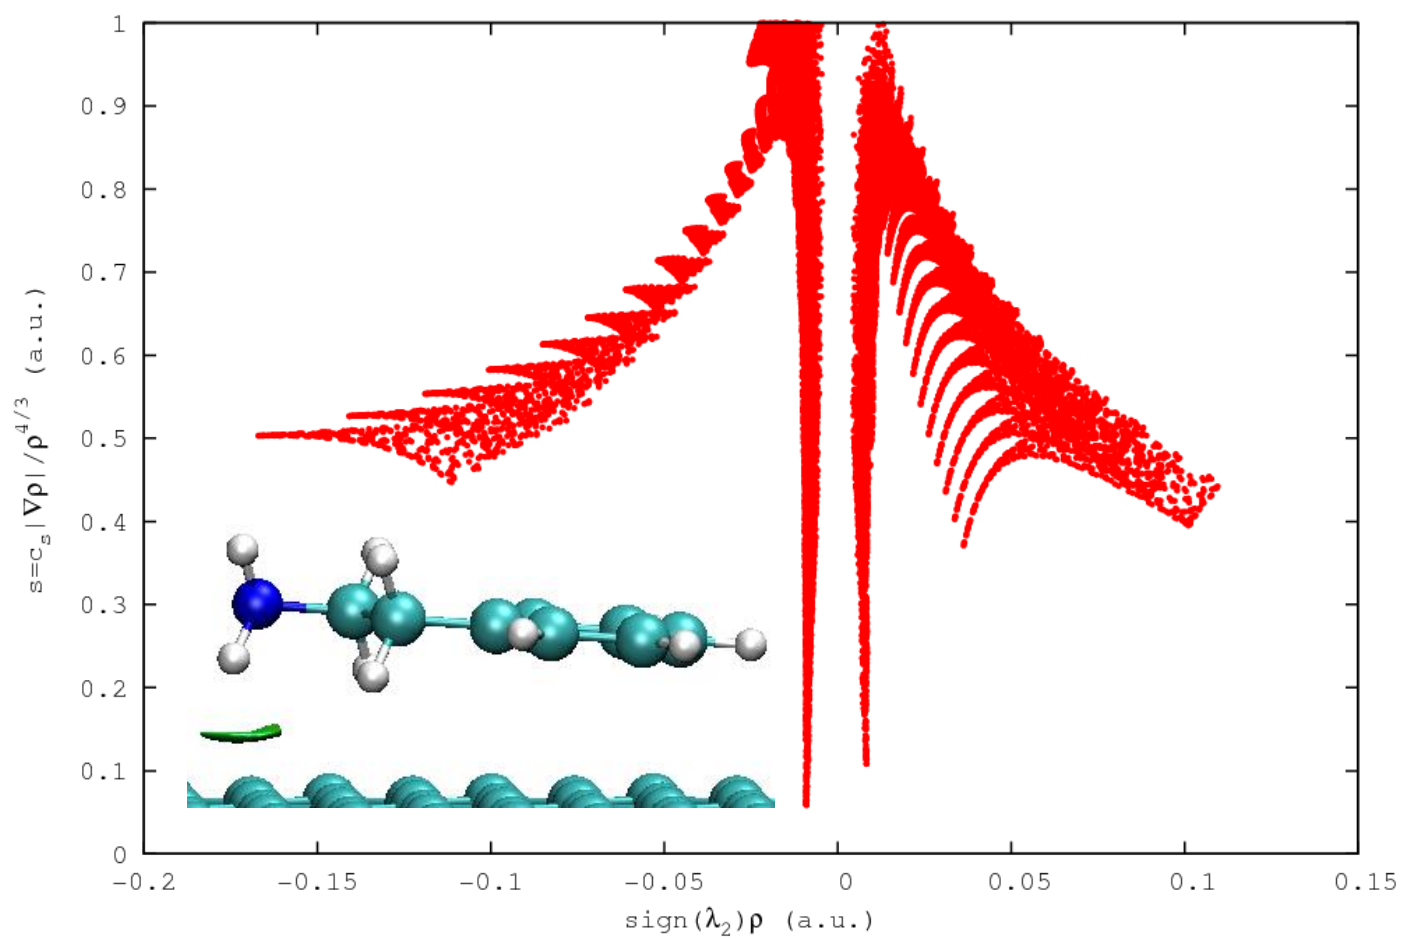

Plot of the RDG vs.  $\text{sign}(\lambda_2)\rho$  of the **PEA1<sup>ads</sup>**

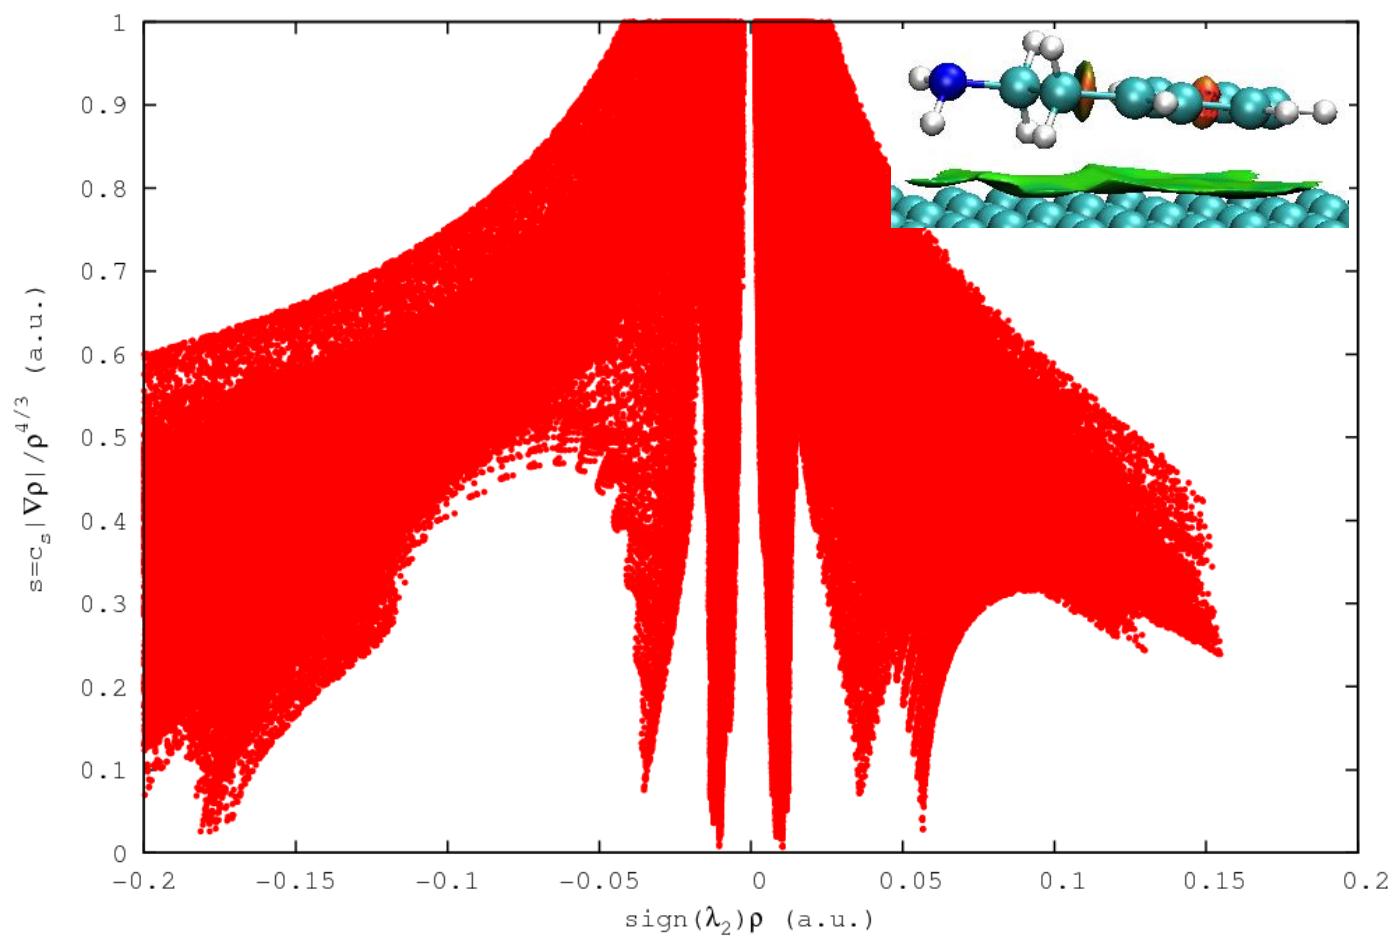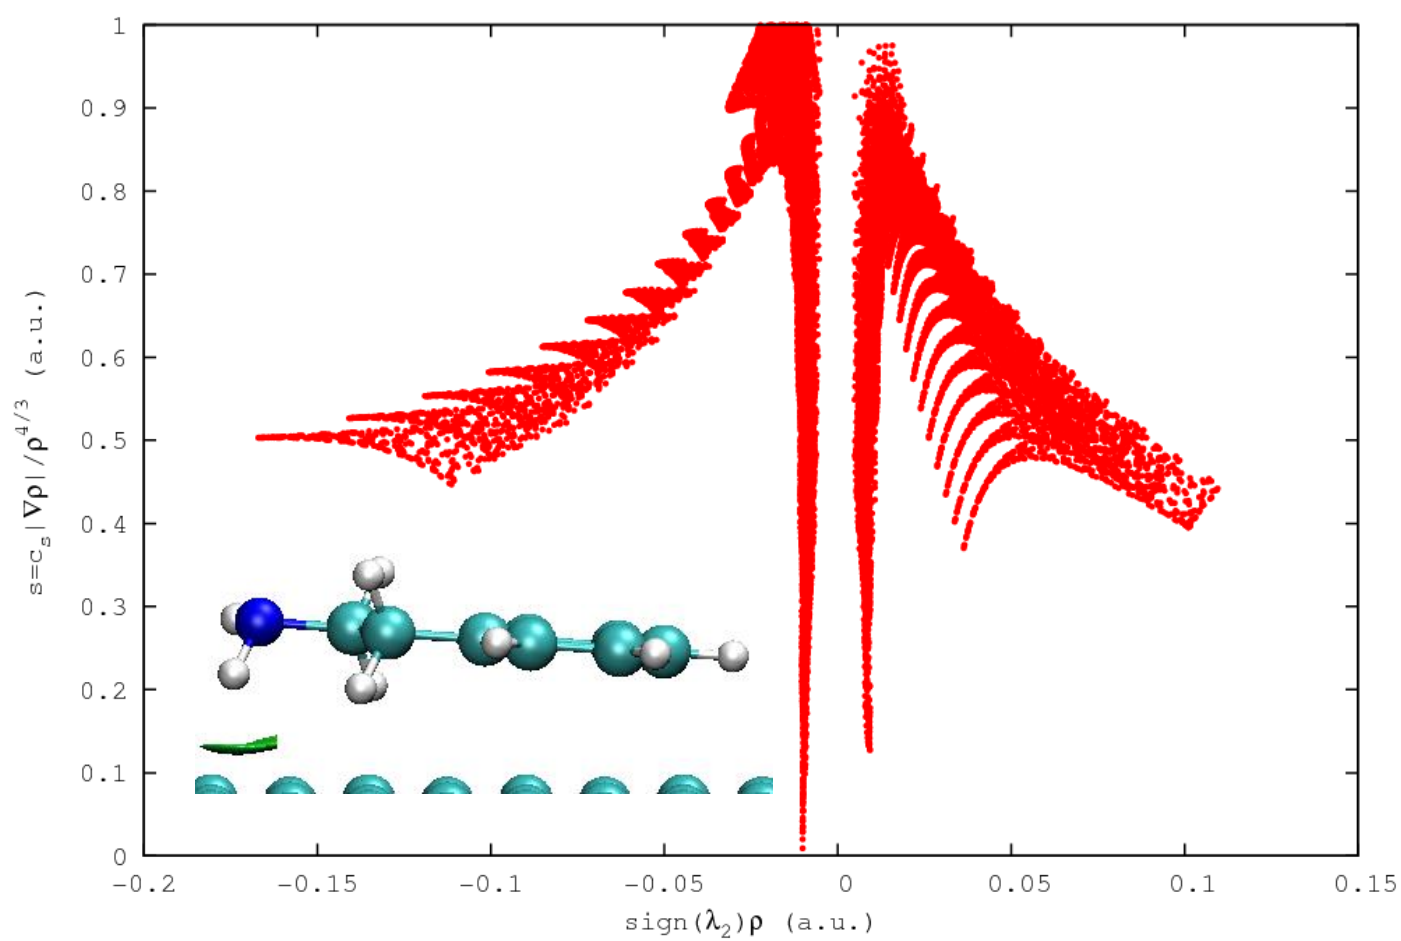

Plot of the RDG vs.  $\text{sign}(\lambda_2)\rho$  of the **PEA2<sup>ads</sup>**

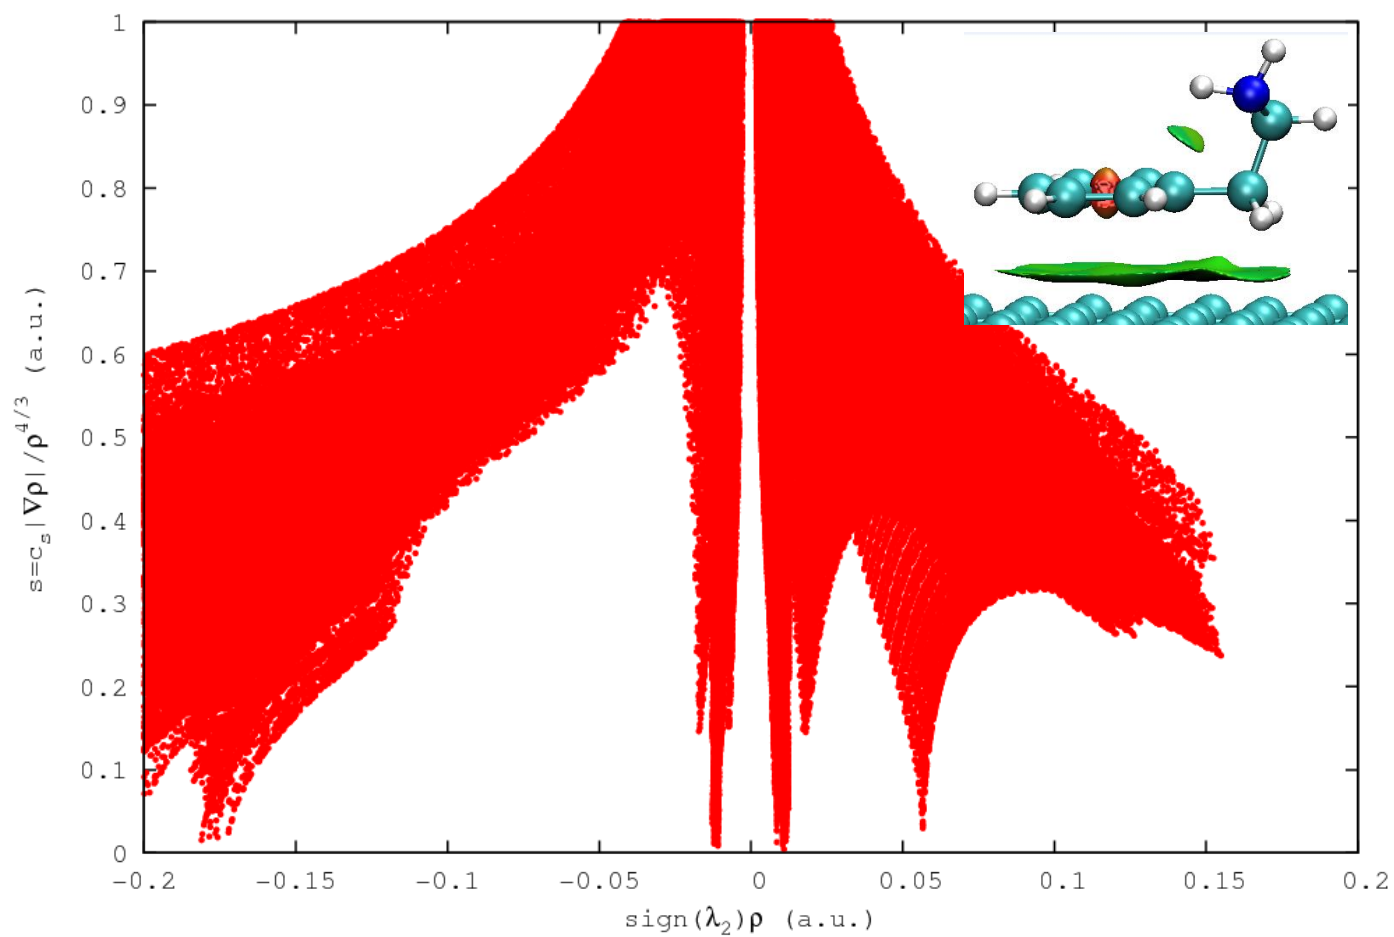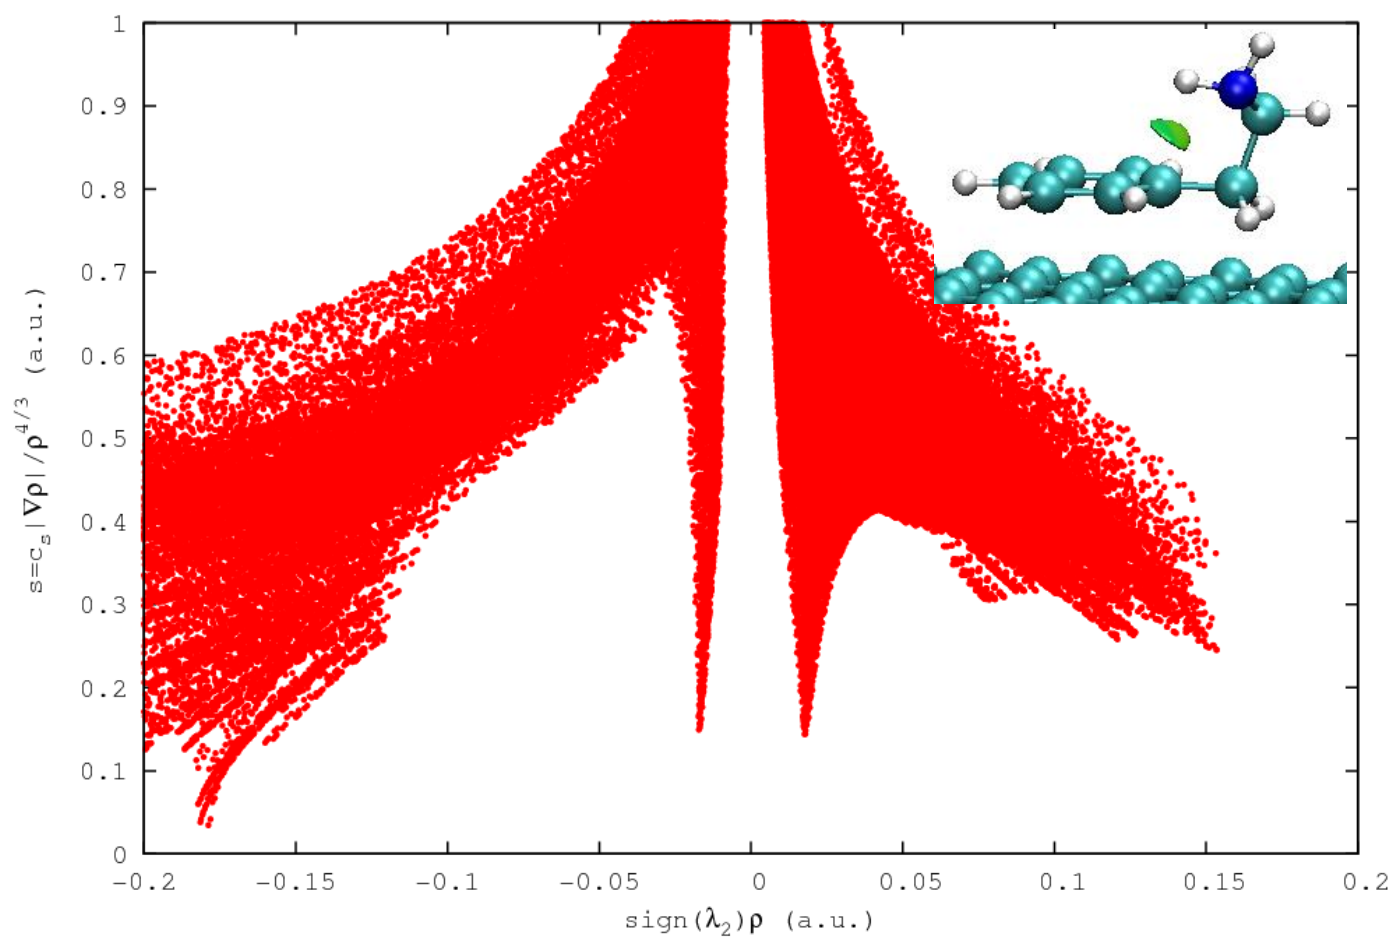

Plot of the RDG vs.  $\text{sign}(\lambda_2)\rho$  of the **PEA3<sup>ads</sup>**



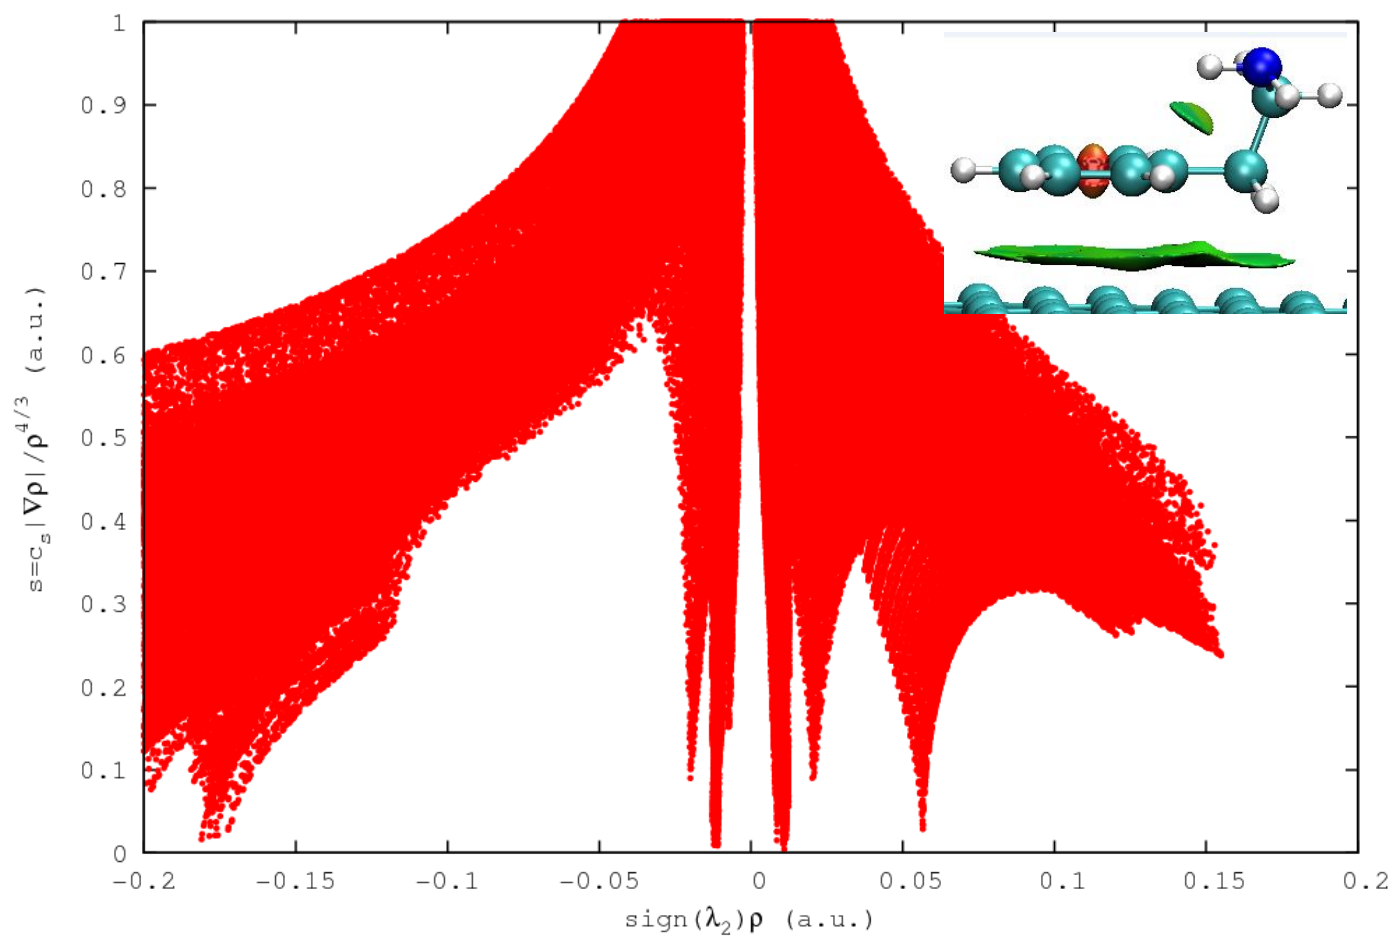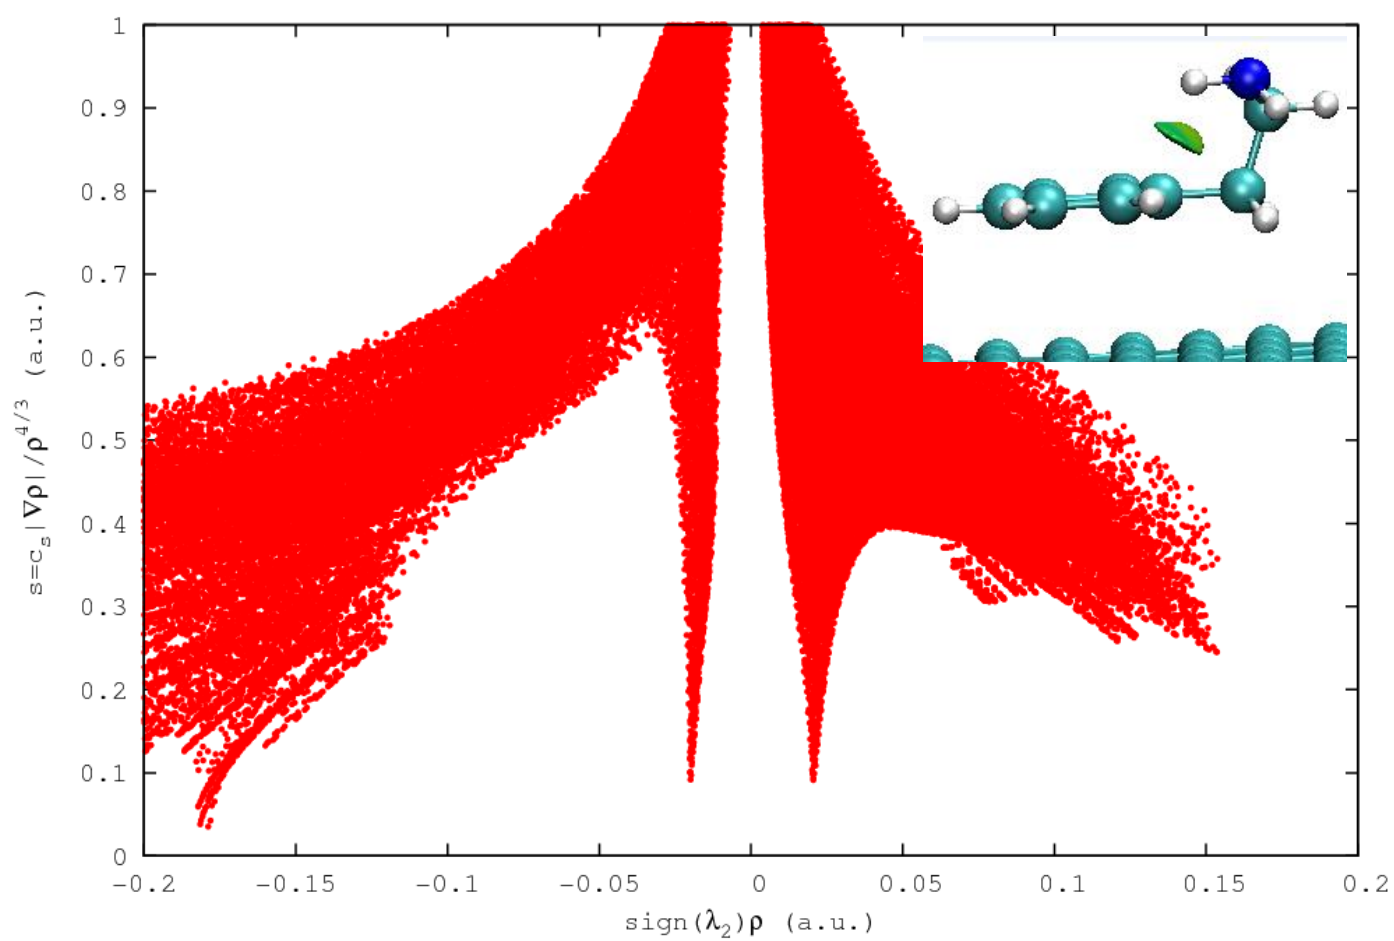

Plot of the RDG vs.  $\text{sign}(\lambda_2)\rho$  of the **PEA4<sup>ads</sup>**
